# Supplementary material for: Unravelling the chain growth mechanism in Cr/NNN-catalysed ethylene oligomerization
Source: Royal Society of Chemistry journal article supplement (doi:10.1039/d3cy00954h), 2023-01-01
Supplement: d3cy00954h1.pdf [file d3cy00954h1.pdf]

**Unravelling the chain growth mechanism in Cr/NNN-catalysed ethylene  
oligomerization**

Jiale Peng, Mengyu Zhu, Long Chen and Zhen Liu\*

School of Chemical Engineering, East China University of Science and Technology, Shanghai 200237, China

\*Corresponding author:

Zhen Liu, Email: [liuzhen@ecust.edu.cn](mailto:liuzhen@ecust.edu.cn)

### *S1. Determination of the ground spin state*

**Table S1.** Free energies (kcal mol<sup>-1</sup>) of all intermediates and transition states via Cossee-Arlman mechanism under possible spin states.

|                 | triplet | quintet |
|-----------------|---------|---------|
| 1A <sup>a</sup> | 31.6    | 0.0     |
| 2A              | 10.4    | 0.9     |
| TS[2A-3A]       | 12.4    | 6.1     |
| 3A              | 12.1    | -14.2   |
| 4A              | -6.9    | -14.0   |
| TS[4A-5A]       | 3.1     | 1.3     |
| 5A              | 0.0     | -28.8   |
| TS[5A-12A]      | -3.9    | -9.8    |
| 6A              | -24.7   | -29.0   |
| TS[6A-7A]       | -10.7   | -11.9   |
| 7A              | -30.8   | -40.8   |
| TS[7A-13A]      | -16.9   | -23.5   |
| 8A              | -32.7   | -40.6   |
| TS[8A-9A]       | -24.4   | -24.9   |
| 9A              | -43.6   | -53.5   |
| TS[9A-14A]      | -30.0   | -35.4   |
| 10A             | -45.8   | -52.7   |
| TS[10A-11A]     | -36.1   | -36.1   |
| 11A             | -37.9   | -65.4   |

<sup>a</sup> Quintet 1A was chosen as the energy reference.

**Table S2.** Free energies (kcal mol<sup>-1</sup>) of all intermediates and transition states via metallacycle mechanism under possible spin states.

|                 | quartet | sextet <sup>c</sup> |
|-----------------|---------|---------------------|
| 1B <sup>a</sup> | 0.0     | 4.1                 |
| 2B              | -8.9    | -7.2                |
| 3B              | -12.3   | -3.7                |
| TS[3B-4B]       | 0.1     | — <sup>b</sup>      |
| 4B              | -13.5   | 8.8                 |
| 5B              | -14.3   | 13.8                |
| TS[5B-6B]       | 8.8     | — <sup>b</sup>      |
| 6B              | -24.7   | 0.1                 |
| TS[6B-11B]      | -7.5    | 9.7                 |
| 7B              | -22.6   | — <sup>b</sup>      |
| TS[7B-8B]       | 0.4     | — <sup>b</sup>      |
| 8B              | -32.8   | -0.3                |
| TS[8B-12B]      | -18.1   | 0.1                 |
| 9B              | -31.9   | -13.7               |
| TS[9B-10B]      | -11.5   | — <sup>b</sup>      |
| 10B             | -48.6   | -24.5               |
| 11B             | -40.5   | -37.4               |
| 12B             | -51.9   | -50.2               |

<sup>a</sup> Quartet 1B was chosen as the energy reference.

<sup>b</sup> Not successfully located.

<sup>c</sup> The intermediates and transition states under the sextet are energetically disfavoured and most of the chromacycle species can not maintain cyclic structure.

## S2. The formation of Cr-butyl species and comparison of two possible chain termination processes

As illustrated in Figure S1, coordination and insertion of two molecule ethylene monomers to generate a Cr-butyl specie was exoergic by 28.8 kcal mol<sup>-1</sup>. It is necessary to consider the two potential termination routes ( $\beta$ -H elimination versus  $\beta$ -H transfer) to decide which one can occur. Figure S2 shows these two possibilities and the activation barrier of  $\beta$ -H transfer route via <sup>5</sup>TS[6A-16A] was calculated to be 0.7 kcal mol<sup>-1</sup>. Due to the relatively high energy barrier (10.7 kcal mol<sup>-1</sup>) compared to  $\beta$ -H elimination, the  $\beta$ -H transfer route can be immediately ruled out. It is notable that the original  $\beta$ -H elimination to give a Cr-hydride (<sup>5</sup>5A  $\rightarrow$  <sup>5</sup>12A) was endergonic by 10.5 kcal mol<sup>-1</sup>, which means this reaction is not spontaneous and will return to Cr-butyl in the absence of ethylene. Similar results have been observed in all calculations towards Cossee-Arlman mechanism involving  $\beta$ -H elimination step.<sup>1-4</sup> Aiming at this phenomenon, a supplemental route was first proposed by McGuinness and co-workers.<sup>1</sup> Once the  $\beta$ -H elimination is achieved, the chromium centre tends to capture an incoming monomer to form a more stable Cr-ethyl species due to the relative low energy barrier of ethylene insertion. This process was also considered in this work and was found to do not impact the overall selectivity.

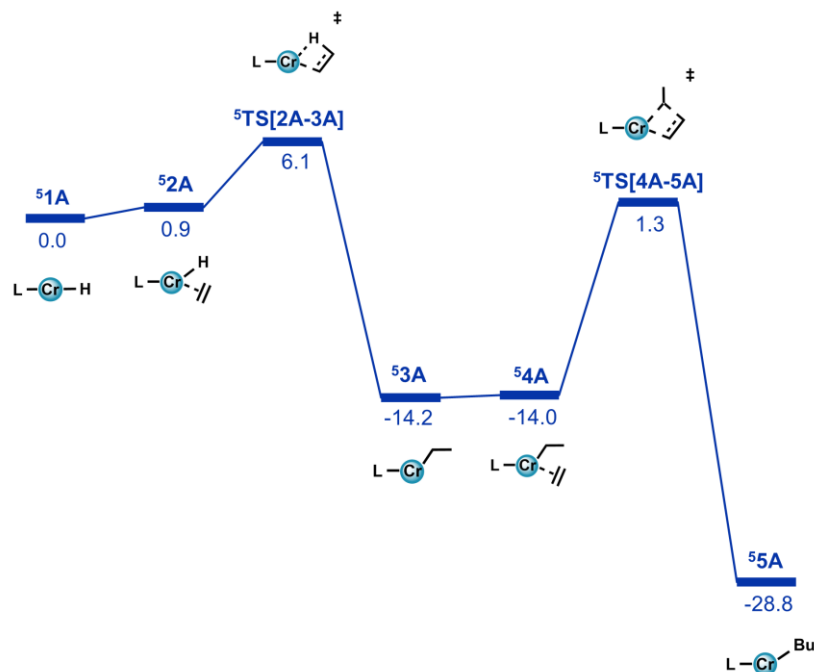

**Figure S1.** Calculated free energy diagrams for the formation of Cr-butyl species. The relative Gibbs free energies calculated at the M06L-D3/def2-TZVP//B3LYP-D3/def2-SVP level are given in kcal mol<sup>-1</sup>. The superscript numbers in the diagrams refer to the spin multiplicity.

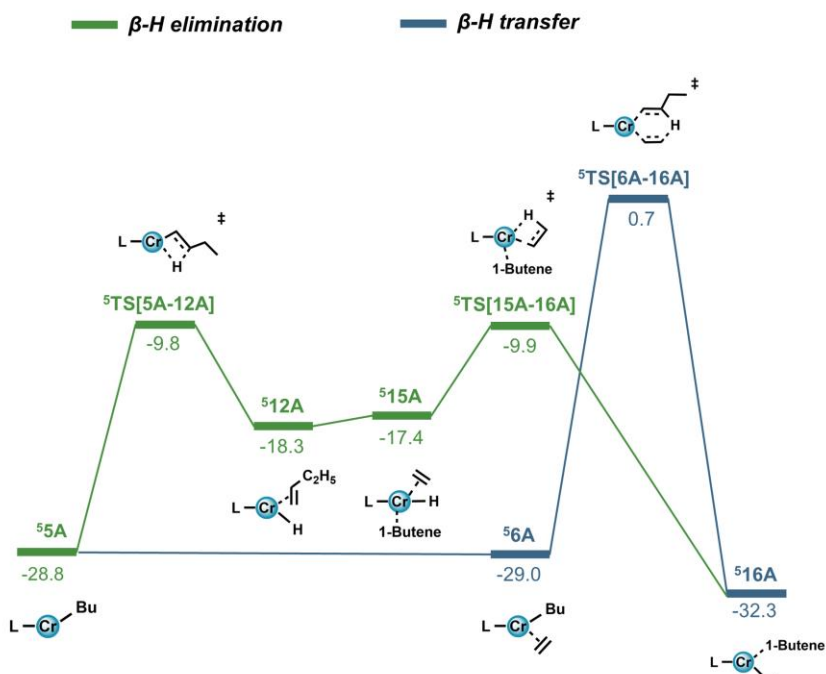

**Figure S2.** Calculated free energy diagrams for chain termination via stepwise  $\beta$ -H elimination (green line) and concerted  $\beta$ -H transfer (gray line). The relative Gibbs free energies calculated at the M06L-D3/def2-TZVP//B3LYP-D3/def2-SVP level are given in kcal mol<sup>-1</sup>. The superscript numbers in the diagrams refer to the spin multiplicity.

*S3. The formation of metallacyclopentane*

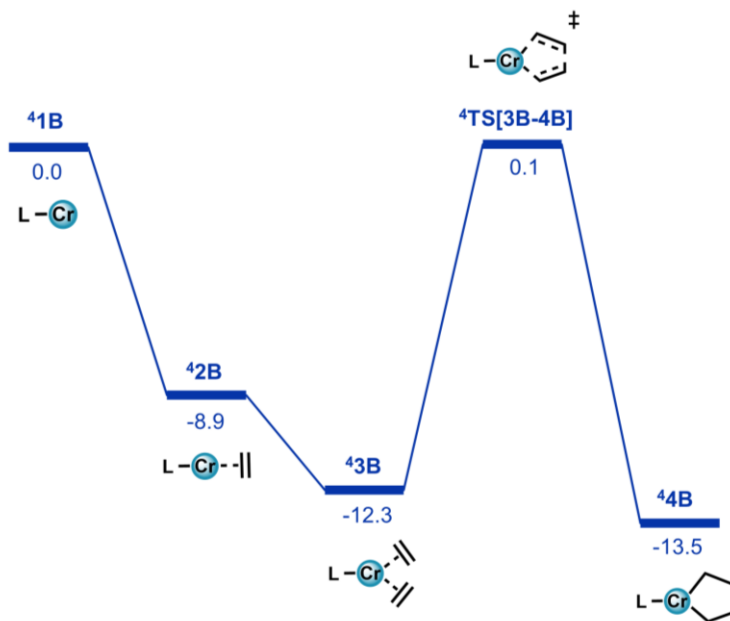

**Figure S3.** Calculated free energy diagrams for the formation of metallacyclopentane. The relative Gibbs free energies calculated at the M06L-D3/def2-TZVP//B3LYP-D3/def2-SVP level are given in kcal mol<sup>-1</sup>. The superscript numbers in the diagrams refer to the spin multiplicity.

#### *S4. Conformational searching*

Various conformers exist for the key intermediate due to the flexibility of alkyl groups. The capture of lowest conformer is critical for the establishment of decisive free energy surface.<sup>5</sup> As for 3,7-H shift structure <sup>4</sup>TS[6B-11B], conformational searching furnished three unique conformers which were called chair conformation, half-chair conformation, and boat conformation (Figure S4). Among them, chair form was found to be most stable. The results of conformational searching along the Cossee-Arlman route and metallacycle route are listed in Table S3 and Table S4, respectively.

**Table S3.** Various conformers of key intermediates and transition states for Cr/NNN-catalysed ethylene oligomerization via a Cossee-Arlman mechanism.

| Structure                | Number of conformers |
|--------------------------|----------------------|
| <sup>5</sup> 5A          | 43                   |
| <sup>5</sup> 6A          | 46                   |
| <sup>5</sup> 7A          | 616                  |
| <sup>5</sup> 8A          | 173                  |
| <sup>5</sup> 9A          | 622                  |
| <sup>5</sup> 10A         | 1230                 |
| <sup>5</sup> TS[6A-7A]   | 62                   |
| <sup>5</sup> TS[5A-12A]  | 6                    |
| <sup>5</sup> TS[8A-9A]   | 277                  |
| <sup>5</sup> TS[7A-13A]  | 30                   |
| <sup>5</sup> TS[10A-11A] | 799                  |
| <sup>5</sup> TS[9A-14A]  | 215                  |
| <sup>5</sup> TS[6A-16A]  | 198                  |
| <sup>5</sup> TS[15A-16A] | 7                    |

**Table S4.** Various conformers of key intermediates and transition states for Cr/NNN-catalysed ethylene oligomerization via a metallacycle mechanism.

| Structure               | Number of conformers |
|-------------------------|----------------------|
| <sup>4</sup> 6B         | 11                   |
| <sup>4</sup> 7B         | 14                   |
| <sup>4</sup> 8B         | 67                   |
| <sup>4</sup> 9B         | 72                   |
| <sup>4</sup> 10B        | 187                  |
| <sup>4</sup> TS[7B-8B]  | 18                   |
| <sup>4</sup> TS[6B-11B] | 3                    |
| <sup>4</sup> TS[9B-10B] | 58                   |
| <sup>4</sup> TS[8B-12B] | 10                   |

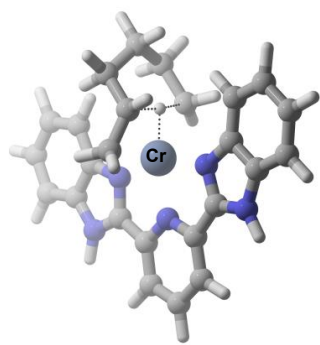

**Chair form**

***-11.5 kcal mol<sup>-1</sup>***

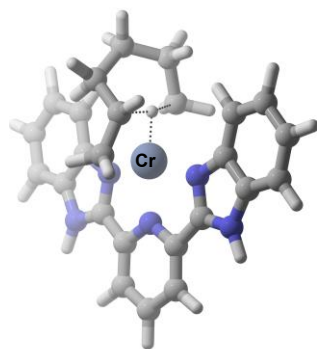

**Half-chair form**

***-8.8 kcal mol<sup>-1</sup>***

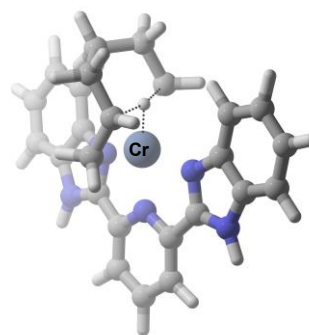

**Boat form**

***-7.4 kcal mol<sup>-1</sup>***

**Figure S4.** Three unique conformers for the 3,7-H shift structure.



*S5. Lowest energy conformers of key intermediates and transition states along the catalytic cycle*

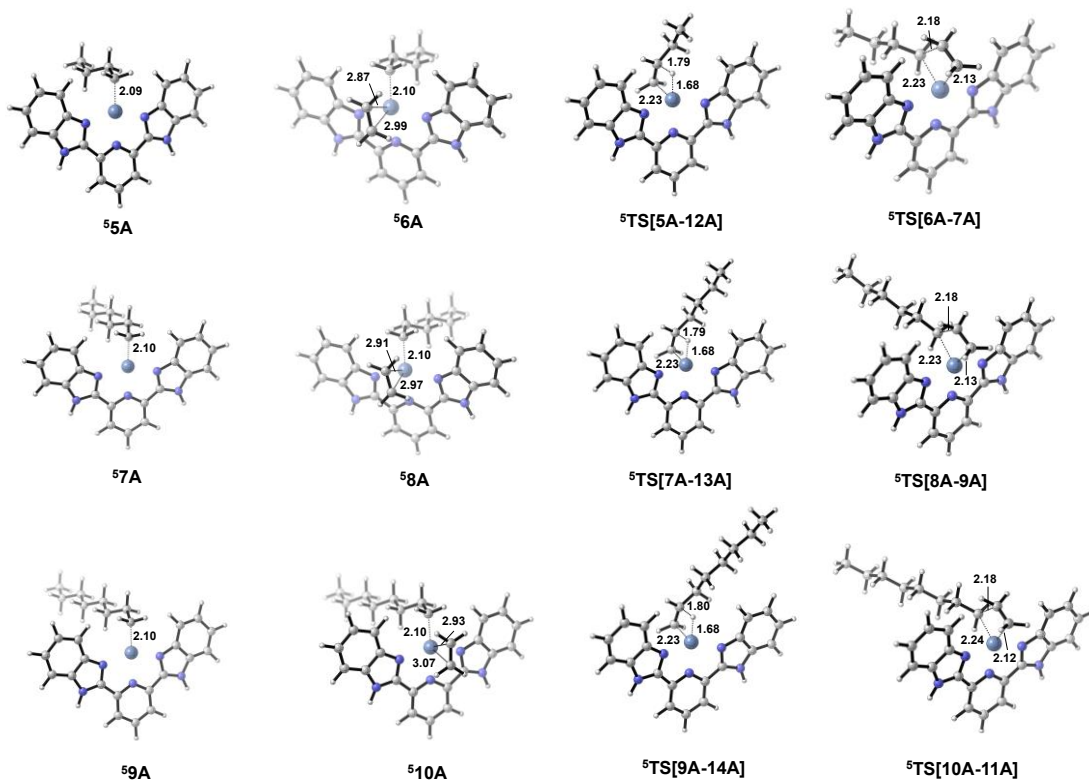

**Figure S5.** Lowest energy conformers of key intermediates and transition states for the catalytic cycle involving a Cossee-Arlman mechanism.

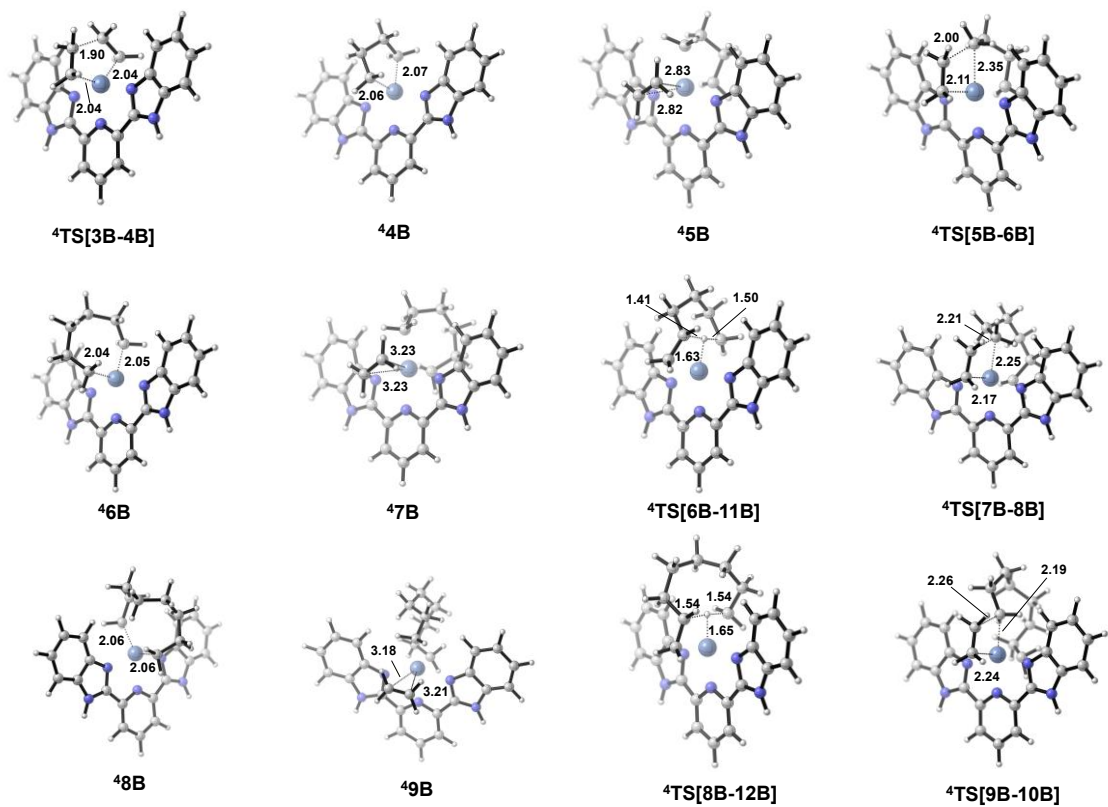

**Figure S6.** Lowest energy conformers of key intermediates and transition states for the catalytic cycle involving a metallacycle mechanism.

### S6. Kinetic Isotope Effect on the 3,7-H shift process

Isotope effect on the 3,7-H shift process of Cr/NNN system was further examined and DFT calculation results (Figure S7) revealed a relatively small KIE value (1.9) compared to  $\beta$ -H elimination step (4.4). It is reasonable to speculate that two types of hydrogen transform mode will lead to different KIE. The presence of KIE causes a deviation of isotopic products distribution from the ideal. However, no matter how large the kinetic isotope effect is, metallacycle routes always deliver even-numbered isotopomers since concerted H-shift process occurs inside the chromacycle.

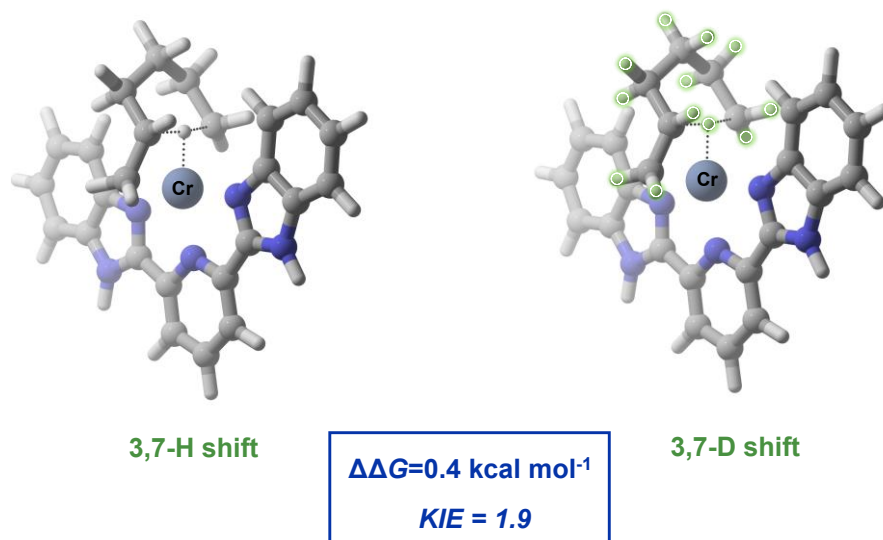

Figure S7. KIE on the 3,7-H shift process of metallacycle mechanism.

*S7. The formation of isotopic metallacycloheptane via a metallacycle mechanism and theoretical distribution of 1-hexene*

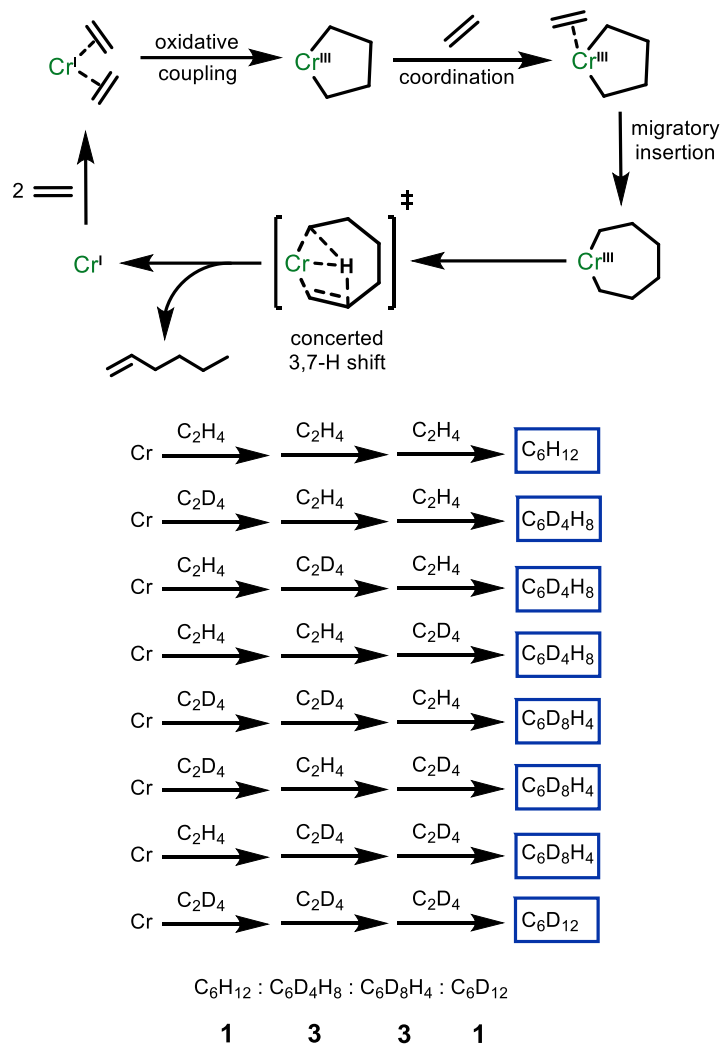

**Figure S8.** Proposed metallacycle mechanism for 1-hexene formation (top) and expected isotopomers distribution from a 1:1 C<sub>2</sub>D<sub>4</sub> / C<sub>2</sub>H<sub>4</sub> mixture with negligible KIE (bottom).

**S8.** *Expected isotopomeric 1-hexene via a Cossee-Arlman mechanism in this case*

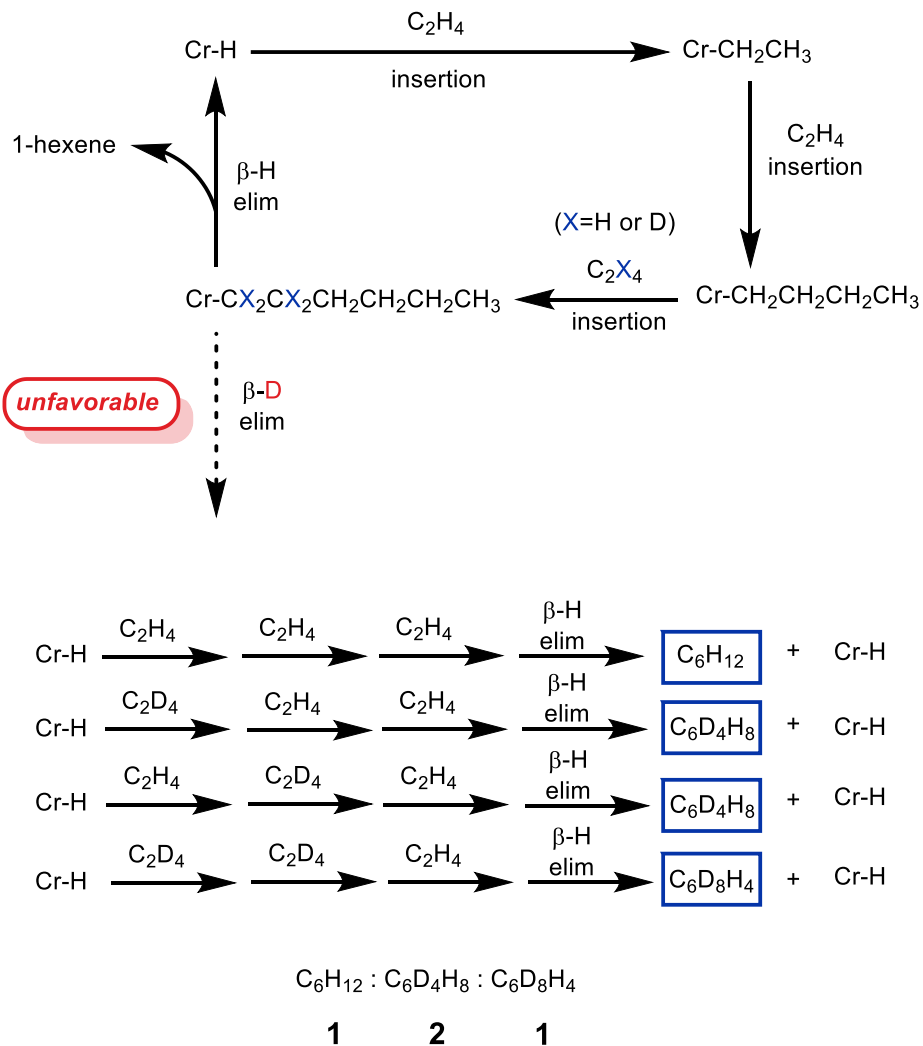

**Figure S9.** Proposed Cossee-Arlman mechanism for 1-hexene formation (top) and expected isotopomers distribution from a 1:1 C<sub>2</sub>D<sub>4</sub> / C<sub>2</sub>H<sub>4</sub> mixture when KIE is considered (bottom).

### ***S9. Explanation of the gas chromatography data in Cr/NNN system***

As for 1-C<sub>10</sub> products, metallacycle mechanism with negligible KIE is supposed to form isotopic C<sub>10</sub>D<sub>20</sub>, C<sub>10</sub>D<sub>16</sub>H<sub>4</sub>, C<sub>10</sub>D<sub>12</sub>H<sub>8</sub>, C<sub>10</sub>D<sub>8</sub>H<sub>12</sub>, C<sub>10</sub>D<sub>4</sub>H<sub>16</sub>, C<sub>10</sub>H<sub>20</sub> products in a ratio of 1:5:10:10:5:1. And this distribution will transform to a ratio of 2:7:9:5:1 of C<sub>10</sub>D<sub>16</sub>H<sub>4</sub>, C<sub>10</sub>D<sub>12</sub>H<sub>8</sub>, C<sub>10</sub>D<sub>8</sub>H<sub>12</sub>, C<sub>10</sub>D<sub>4</sub>H<sub>16</sub>, C<sub>10</sub>H<sub>20</sub> when KIE is included. It can be seen that Cossee-type isotopomers distribution are quite similar to metallacycle routes when KIE is both considered in these two proposals. However, the C<sub>10</sub>D<sub>16</sub>H<sub>4</sub>, C<sub>10</sub>D<sub>12</sub>H<sub>8</sub>, C<sub>10</sub>D<sub>8</sub>H<sub>12</sub>, C<sub>10</sub>D<sub>4</sub>H<sub>16</sub>, C<sub>10</sub>H<sub>20</sub> products delivered by a Cossee-Arlman mechanism (KIE included) in a ratio of 1:4:6:4:1 (Figure S10) are in great agreement of original data in the literature.<sup>6</sup> In addition, the peaks of isotopic 1-C<sub>12</sub> and 1-C<sub>14</sub> from an oligomerization of 1:1 C<sub>2</sub>H<sub>4</sub> / C<sub>2</sub>D<sub>4</sub> also give a best fit to the Cossee-Arlman mechanism when an isotope effect was considered (Figure S11).

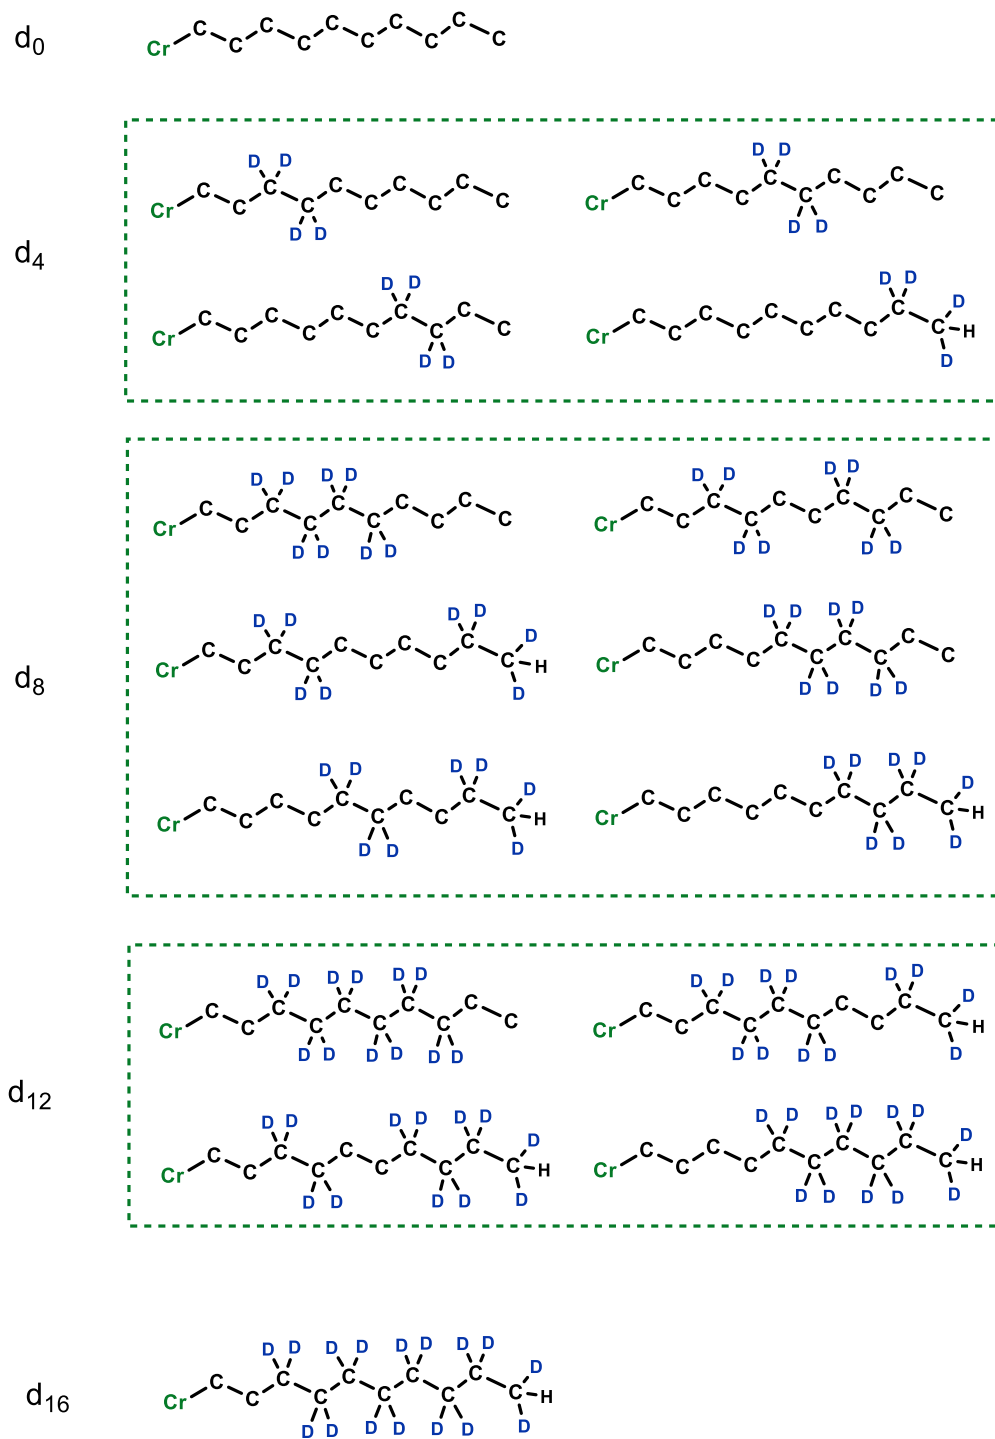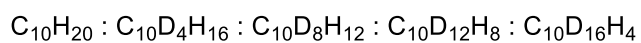

1            4            6            4            1

**Figure S10.** All expected isotopomers of 1-C<sub>10</sub> and their statistical distribution for a Cossee-Arlman mechanism when KIE is considered.

|                      | <i>Metallacycle</i>                                                                                                                                                                                                                                                                                                                                                                                                                               | <i>Cossee-Arlman</i> |   |                   |    |                      |    |                      |    |                                                                                                                                                                                                                                               |                |                                                                                                                                                                                                                                                                                                                       |                   |                                                                                                                                                                                                                                                                                                                                                                                     |                   |                                                                                                                                                                                                                                                                                                                                                                                                                                                  |                   |   |                      |    |                      |    |                      |    |                   |    |                   |   |                |   |
|----------------------|---------------------------------------------------------------------------------------------------------------------------------------------------------------------------------------------------------------------------------------------------------------------------------------------------------------------------------------------------------------------------------------------------------------------------------------------------|----------------------|---|-------------------|----|----------------------|----|----------------------|----|-----------------------------------------------------------------------------------------------------------------------------------------------------------------------------------------------------------------------------------------------|----------------|-----------------------------------------------------------------------------------------------------------------------------------------------------------------------------------------------------------------------------------------------------------------------------------------------------------------------|-------------------|-------------------------------------------------------------------------------------------------------------------------------------------------------------------------------------------------------------------------------------------------------------------------------------------------------------------------------------------------------------------------------------|-------------------|--------------------------------------------------------------------------------------------------------------------------------------------------------------------------------------------------------------------------------------------------------------------------------------------------------------------------------------------------------------------------------------------------------------------------------------------------|-------------------|---|----------------------|----|----------------------|----|----------------------|----|-------------------|----|-------------------|---|----------------|---|
| 1-C8                 | <table border="1"> <tr><td><math>C_8D_{12}H_4</math></td><td>2</td></tr> <tr><td><math>C_8D_8H_8</math></td><td>5</td></tr> <tr><td><math>C_8D_4H_{12}</math></td><td>4</td></tr> <tr><td><math>C_8H_{16}</math></td><td>1</td></tr> </table>                                                                                                                                                                                                     | $C_8D_{12}H_4$       | 2 | $C_8D_8H_8$       | 5  | $C_8D_4H_{12}$       | 4  | $C_8H_{16}$          | 1  | <table border="1"> <tr><td><math>C_8D_{12}H_4</math></td><td>1</td></tr> <tr><td><math>C_8D_8H_8</math></td><td>3</td></tr> <tr><td><math>C_8D_4H_{12}</math></td><td>3</td></tr> <tr><td><math>C_8H_{16}</math></td><td>1</td></tr> </table> | $C_8D_{12}H_4$ | 1                                                                                                                                                                                                                                                                                                                     | $C_8D_8H_8$       | 3                                                                                                                                                                                                                                                                                                                                                                                   | $C_8D_4H_{12}$    | 3                                                                                                                                                                                                                                                                                                                                                                                                                                                | $C_8H_{16}$       | 1 |                      |    |                      |    |                      |    |                   |    |                   |   |                |   |
| $C_8D_{12}H_4$       | 2                                                                                                                                                                                                                                                                                                                                                                                                                                                 |                      |   |                   |    |                      |    |                      |    |                                                                                                                                                                                                                                               |                |                                                                                                                                                                                                                                                                                                                       |                   |                                                                                                                                                                                                                                                                                                                                                                                     |                   |                                                                                                                                                                                                                                                                                                                                                                                                                                                  |                   |   |                      |    |                      |    |                      |    |                   |    |                   |   |                |   |
| $C_8D_8H_8$          | 5                                                                                                                                                                                                                                                                                                                                                                                                                                                 |                      |   |                   |    |                      |    |                      |    |                                                                                                                                                                                                                                               |                |                                                                                                                                                                                                                                                                                                                       |                   |                                                                                                                                                                                                                                                                                                                                                                                     |                   |                                                                                                                                                                                                                                                                                                                                                                                                                                                  |                   |   |                      |    |                      |    |                      |    |                   |    |                   |   |                |   |
| $C_8D_4H_{12}$       | 4                                                                                                                                                                                                                                                                                                                                                                                                                                                 |                      |   |                   |    |                      |    |                      |    |                                                                                                                                                                                                                                               |                |                                                                                                                                                                                                                                                                                                                       |                   |                                                                                                                                                                                                                                                                                                                                                                                     |                   |                                                                                                                                                                                                                                                                                                                                                                                                                                                  |                   |   |                      |    |                      |    |                      |    |                   |    |                   |   |                |   |
| $C_8H_{16}$          | 1                                                                                                                                                                                                                                                                                                                                                                                                                                                 |                      |   |                   |    |                      |    |                      |    |                                                                                                                                                                                                                                               |                |                                                                                                                                                                                                                                                                                                                       |                   |                                                                                                                                                                                                                                                                                                                                                                                     |                   |                                                                                                                                                                                                                                                                                                                                                                                                                                                  |                   |   |                      |    |                      |    |                      |    |                   |    |                   |   |                |   |
| $C_8D_{12}H_4$       | 1                                                                                                                                                                                                                                                                                                                                                                                                                                                 |                      |   |                   |    |                      |    |                      |    |                                                                                                                                                                                                                                               |                |                                                                                                                                                                                                                                                                                                                       |                   |                                                                                                                                                                                                                                                                                                                                                                                     |                   |                                                                                                                                                                                                                                                                                                                                                                                                                                                  |                   |   |                      |    |                      |    |                      |    |                   |    |                   |   |                |   |
| $C_8D_8H_8$          | 3                                                                                                                                                                                                                                                                                                                                                                                                                                                 |                      |   |                   |    |                      |    |                      |    |                                                                                                                                                                                                                                               |                |                                                                                                                                                                                                                                                                                                                       |                   |                                                                                                                                                                                                                                                                                                                                                                                     |                   |                                                                                                                                                                                                                                                                                                                                                                                                                                                  |                   |   |                      |    |                      |    |                      |    |                   |    |                   |   |                |   |
| $C_8D_4H_{12}$       | 3                                                                                                                                                                                                                                                                                                                                                                                                                                                 |                      |   |                   |    |                      |    |                      |    |                                                                                                                                                                                                                                               |                |                                                                                                                                                                                                                                                                                                                       |                   |                                                                                                                                                                                                                                                                                                                                                                                     |                   |                                                                                                                                                                                                                                                                                                                                                                                                                                                  |                   |   |                      |    |                      |    |                      |    |                   |    |                   |   |                |   |
| $C_8H_{16}$          | 1                                                                                                                                                                                                                                                                                                                                                                                                                                                 |                      |   |                   |    |                      |    |                      |    |                                                                                                                                                                                                                                               |                |                                                                                                                                                                                                                                                                                                                       |                   |                                                                                                                                                                                                                                                                                                                                                                                     |                   |                                                                                                                                                                                                                                                                                                                                                                                                                                                  |                   |   |                      |    |                      |    |                      |    |                   |    |                   |   |                |   |
| 1-C10                | <table border="1"> <tr><td><math>C_{10}D_{16}H_4</math></td><td>2</td></tr> <tr><td><math>C_{10}D_{12}H_8</math></td><td>7</td></tr> <tr><td><math>C_{10}D_8H_{12}</math></td><td>9</td></tr> <tr><td><math>C_{10}D_4H_{16}</math></td><td>5</td></tr> <tr><td><math>C_{10}H_{20}</math></td><td>1</td></tr> </table>                                                                                                                             | $C_{10}D_{16}H_4$    | 2 | $C_{10}D_{12}H_8$ | 7  | $C_{10}D_8H_{12}$    | 9  | $C_{10}D_4H_{16}$    | 5  | $C_{10}H_{20}$                                                                                                                                                                                                                                | 1              | <table border="1"> <tr><td><math>C_{10}D_{16}H_4</math></td><td>1</td></tr> <tr><td><math>C_{10}D_{12}H_8</math></td><td>4</td></tr> <tr><td><math>C_{10}D_8H_{12}</math></td><td>6</td></tr> <tr><td><math>C_{10}D_4H_{16}</math></td><td>4</td></tr> <tr><td><math>C_{10}H_{20}</math></td><td>1</td></tr> </table> | $C_{10}D_{16}H_4$ | 1                                                                                                                                                                                                                                                                                                                                                                                   | $C_{10}D_{12}H_8$ | 4                                                                                                                                                                                                                                                                                                                                                                                                                                                | $C_{10}D_8H_{12}$ | 6 | $C_{10}D_4H_{16}$    | 4  | $C_{10}H_{20}$       | 1  |                      |    |                   |    |                   |   |                |   |
| $C_{10}D_{16}H_4$    | 2                                                                                                                                                                                                                                                                                                                                                                                                                                                 |                      |   |                   |    |                      |    |                      |    |                                                                                                                                                                                                                                               |                |                                                                                                                                                                                                                                                                                                                       |                   |                                                                                                                                                                                                                                                                                                                                                                                     |                   |                                                                                                                                                                                                                                                                                                                                                                                                                                                  |                   |   |                      |    |                      |    |                      |    |                   |    |                   |   |                |   |
| $C_{10}D_{12}H_8$    | 7                                                                                                                                                                                                                                                                                                                                                                                                                                                 |                      |   |                   |    |                      |    |                      |    |                                                                                                                                                                                                                                               |                |                                                                                                                                                                                                                                                                                                                       |                   |                                                                                                                                                                                                                                                                                                                                                                                     |                   |                                                                                                                                                                                                                                                                                                                                                                                                                                                  |                   |   |                      |    |                      |    |                      |    |                   |    |                   |   |                |   |
| $C_{10}D_8H_{12}$    | 9                                                                                                                                                                                                                                                                                                                                                                                                                                                 |                      |   |                   |    |                      |    |                      |    |                                                                                                                                                                                                                                               |                |                                                                                                                                                                                                                                                                                                                       |                   |                                                                                                                                                                                                                                                                                                                                                                                     |                   |                                                                                                                                                                                                                                                                                                                                                                                                                                                  |                   |   |                      |    |                      |    |                      |    |                   |    |                   |   |                |   |
| $C_{10}D_4H_{16}$    | 5                                                                                                                                                                                                                                                                                                                                                                                                                                                 |                      |   |                   |    |                      |    |                      |    |                                                                                                                                                                                                                                               |                |                                                                                                                                                                                                                                                                                                                       |                   |                                                                                                                                                                                                                                                                                                                                                                                     |                   |                                                                                                                                                                                                                                                                                                                                                                                                                                                  |                   |   |                      |    |                      |    |                      |    |                   |    |                   |   |                |   |
| $C_{10}H_{20}$       | 1                                                                                                                                                                                                                                                                                                                                                                                                                                                 |                      |   |                   |    |                      |    |                      |    |                                                                                                                                                                                                                                               |                |                                                                                                                                                                                                                                                                                                                       |                   |                                                                                                                                                                                                                                                                                                                                                                                     |                   |                                                                                                                                                                                                                                                                                                                                                                                                                                                  |                   |   |                      |    |                      |    |                      |    |                   |    |                   |   |                |   |
| $C_{10}D_{16}H_4$    | 1                                                                                                                                                                                                                                                                                                                                                                                                                                                 |                      |   |                   |    |                      |    |                      |    |                                                                                                                                                                                                                                               |                |                                                                                                                                                                                                                                                                                                                       |                   |                                                                                                                                                                                                                                                                                                                                                                                     |                   |                                                                                                                                                                                                                                                                                                                                                                                                                                                  |                   |   |                      |    |                      |    |                      |    |                   |    |                   |   |                |   |
| $C_{10}D_{12}H_8$    | 4                                                                                                                                                                                                                                                                                                                                                                                                                                                 |                      |   |                   |    |                      |    |                      |    |                                                                                                                                                                                                                                               |                |                                                                                                                                                                                                                                                                                                                       |                   |                                                                                                                                                                                                                                                                                                                                                                                     |                   |                                                                                                                                                                                                                                                                                                                                                                                                                                                  |                   |   |                      |    |                      |    |                      |    |                   |    |                   |   |                |   |
| $C_{10}D_8H_{12}$    | 6                                                                                                                                                                                                                                                                                                                                                                                                                                                 |                      |   |                   |    |                      |    |                      |    |                                                                                                                                                                                                                                               |                |                                                                                                                                                                                                                                                                                                                       |                   |                                                                                                                                                                                                                                                                                                                                                                                     |                   |                                                                                                                                                                                                                                                                                                                                                                                                                                                  |                   |   |                      |    |                      |    |                      |    |                   |    |                   |   |                |   |
| $C_{10}D_4H_{16}$    | 4                                                                                                                                                                                                                                                                                                                                                                                                                                                 |                      |   |                   |    |                      |    |                      |    |                                                                                                                                                                                                                                               |                |                                                                                                                                                                                                                                                                                                                       |                   |                                                                                                                                                                                                                                                                                                                                                                                     |                   |                                                                                                                                                                                                                                                                                                                                                                                                                                                  |                   |   |                      |    |                      |    |                      |    |                   |    |                   |   |                |   |
| $C_{10}H_{20}$       | 1                                                                                                                                                                                                                                                                                                                                                                                                                                                 |                      |   |                   |    |                      |    |                      |    |                                                                                                                                                                                                                                               |                |                                                                                                                                                                                                                                                                                                                       |                   |                                                                                                                                                                                                                                                                                                                                                                                     |                   |                                                                                                                                                                                                                                                                                                                                                                                                                                                  |                   |   |                      |    |                      |    |                      |    |                   |    |                   |   |                |   |
| 1-C12                | <table border="1"> <tr><td><math>C_{12}D_{20}H_4</math></td><td>2</td></tr> <tr><td><math>C_{12}D_{16}H_8</math></td><td>9</td></tr> <tr><td><math>C_{12}D_{12}H_{12}</math></td><td>16</td></tr> <tr><td><math>C_{12}D_8H_{16}</math></td><td>14</td></tr> <tr><td><math>C_{12}D_4H_{20}</math></td><td>6</td></tr> <tr><td><math>C_{12}H_{24}</math></td><td>1</td></tr> </table>                                                               | $C_{12}D_{20}H_4$    | 2 | $C_{12}D_{16}H_8$ | 9  | $C_{12}D_{12}H_{12}$ | 16 | $C_{12}D_8H_{16}$    | 14 | $C_{12}D_4H_{20}$                                                                                                                                                                                                                             | 6              | $C_{12}H_{24}$                                                                                                                                                                                                                                                                                                        | 1                 | <table border="1"> <tr><td><math>C_{12}D_{20}H_4</math></td><td>1</td></tr> <tr><td><math>C_{12}D_{16}H_8</math></td><td>5</td></tr> <tr><td><math>C_{12}D_{12}H_{12}</math></td><td>10</td></tr> <tr><td><math>C_{12}D_8H_{16}</math></td><td>10</td></tr> <tr><td><math>C_{12}D_4H_{20}</math></td><td>5</td></tr> <tr><td><math>C_{12}H_{24}</math></td><td>1</td></tr> </table> | $C_{12}D_{20}H_4$ | 1                                                                                                                                                                                                                                                                                                                                                                                                                                                | $C_{12}D_{16}H_8$ | 5 | $C_{12}D_{12}H_{12}$ | 10 | $C_{12}D_8H_{16}$    | 10 | $C_{12}D_4H_{20}$    | 5  | $C_{12}H_{24}$    | 1  |                   |   |                |   |
| $C_{12}D_{20}H_4$    | 2                                                                                                                                                                                                                                                                                                                                                                                                                                                 |                      |   |                   |    |                      |    |                      |    |                                                                                                                                                                                                                                               |                |                                                                                                                                                                                                                                                                                                                       |                   |                                                                                                                                                                                                                                                                                                                                                                                     |                   |                                                                                                                                                                                                                                                                                                                                                                                                                                                  |                   |   |                      |    |                      |    |                      |    |                   |    |                   |   |                |   |
| $C_{12}D_{16}H_8$    | 9                                                                                                                                                                                                                                                                                                                                                                                                                                                 |                      |   |                   |    |                      |    |                      |    |                                                                                                                                                                                                                                               |                |                                                                                                                                                                                                                                                                                                                       |                   |                                                                                                                                                                                                                                                                                                                                                                                     |                   |                                                                                                                                                                                                                                                                                                                                                                                                                                                  |                   |   |                      |    |                      |    |                      |    |                   |    |                   |   |                |   |
| $C_{12}D_{12}H_{12}$ | 16                                                                                                                                                                                                                                                                                                                                                                                                                                                |                      |   |                   |    |                      |    |                      |    |                                                                                                                                                                                                                                               |                |                                                                                                                                                                                                                                                                                                                       |                   |                                                                                                                                                                                                                                                                                                                                                                                     |                   |                                                                                                                                                                                                                                                                                                                                                                                                                                                  |                   |   |                      |    |                      |    |                      |    |                   |    |                   |   |                |   |
| $C_{12}D_8H_{16}$    | 14                                                                                                                                                                                                                                                                                                                                                                                                                                                |                      |   |                   |    |                      |    |                      |    |                                                                                                                                                                                                                                               |                |                                                                                                                                                                                                                                                                                                                       |                   |                                                                                                                                                                                                                                                                                                                                                                                     |                   |                                                                                                                                                                                                                                                                                                                                                                                                                                                  |                   |   |                      |    |                      |    |                      |    |                   |    |                   |   |                |   |
| $C_{12}D_4H_{20}$    | 6                                                                                                                                                                                                                                                                                                                                                                                                                                                 |                      |   |                   |    |                      |    |                      |    |                                                                                                                                                                                                                                               |                |                                                                                                                                                                                                                                                                                                                       |                   |                                                                                                                                                                                                                                                                                                                                                                                     |                   |                                                                                                                                                                                                                                                                                                                                                                                                                                                  |                   |   |                      |    |                      |    |                      |    |                   |    |                   |   |                |   |
| $C_{12}H_{24}$       | 1                                                                                                                                                                                                                                                                                                                                                                                                                                                 |                      |   |                   |    |                      |    |                      |    |                                                                                                                                                                                                                                               |                |                                                                                                                                                                                                                                                                                                                       |                   |                                                                                                                                                                                                                                                                                                                                                                                     |                   |                                                                                                                                                                                                                                                                                                                                                                                                                                                  |                   |   |                      |    |                      |    |                      |    |                   |    |                   |   |                |   |
| $C_{12}D_{20}H_4$    | 1                                                                                                                                                                                                                                                                                                                                                                                                                                                 |                      |   |                   |    |                      |    |                      |    |                                                                                                                                                                                                                                               |                |                                                                                                                                                                                                                                                                                                                       |                   |                                                                                                                                                                                                                                                                                                                                                                                     |                   |                                                                                                                                                                                                                                                                                                                                                                                                                                                  |                   |   |                      |    |                      |    |                      |    |                   |    |                   |   |                |   |
| $C_{12}D_{16}H_8$    | 5                                                                                                                                                                                                                                                                                                                                                                                                                                                 |                      |   |                   |    |                      |    |                      |    |                                                                                                                                                                                                                                               |                |                                                                                                                                                                                                                                                                                                                       |                   |                                                                                                                                                                                                                                                                                                                                                                                     |                   |                                                                                                                                                                                                                                                                                                                                                                                                                                                  |                   |   |                      |    |                      |    |                      |    |                   |    |                   |   |                |   |
| $C_{12}D_{12}H_{12}$ | 10                                                                                                                                                                                                                                                                                                                                                                                                                                                |                      |   |                   |    |                      |    |                      |    |                                                                                                                                                                                                                                               |                |                                                                                                                                                                                                                                                                                                                       |                   |                                                                                                                                                                                                                                                                                                                                                                                     |                   |                                                                                                                                                                                                                                                                                                                                                                                                                                                  |                   |   |                      |    |                      |    |                      |    |                   |    |                   |   |                |   |
| $C_{12}D_8H_{16}$    | 10                                                                                                                                                                                                                                                                                                                                                                                                                                                |                      |   |                   |    |                      |    |                      |    |                                                                                                                                                                                                                                               |                |                                                                                                                                                                                                                                                                                                                       |                   |                                                                                                                                                                                                                                                                                                                                                                                     |                   |                                                                                                                                                                                                                                                                                                                                                                                                                                                  |                   |   |                      |    |                      |    |                      |    |                   |    |                   |   |                |   |
| $C_{12}D_4H_{20}$    | 5                                                                                                                                                                                                                                                                                                                                                                                                                                                 |                      |   |                   |    |                      |    |                      |    |                                                                                                                                                                                                                                               |                |                                                                                                                                                                                                                                                                                                                       |                   |                                                                                                                                                                                                                                                                                                                                                                                     |                   |                                                                                                                                                                                                                                                                                                                                                                                                                                                  |                   |   |                      |    |                      |    |                      |    |                   |    |                   |   |                |   |
| $C_{12}H_{24}$       | 1                                                                                                                                                                                                                                                                                                                                                                                                                                                 |                      |   |                   |    |                      |    |                      |    |                                                                                                                                                                                                                                               |                |                                                                                                                                                                                                                                                                                                                       |                   |                                                                                                                                                                                                                                                                                                                                                                                     |                   |                                                                                                                                                                                                                                                                                                                                                                                                                                                  |                   |   |                      |    |                      |    |                      |    |                   |    |                   |   |                |   |
| 1-C14                | <table border="1"> <tr><td><math>C_{14}D_{24}H_4</math></td><td>2</td></tr> <tr><td><math>C_{14}D_{20}H_8</math></td><td>11</td></tr> <tr><td><math>C_{14}D_{16}H_{12}</math></td><td>25</td></tr> <tr><td><math>C_{14}D_{12}H_{16}</math></td><td>30</td></tr> <tr><td><math>C_{14}D_8H_{20}</math></td><td>20</td></tr> <tr><td><math>C_{14}D_4H_{24}</math></td><td>7</td></tr> <tr><td><math>C_{14}H_{28}</math></td><td>1</td></tr> </table> | $C_{14}D_{24}H_4$    | 2 | $C_{14}D_{20}H_8$ | 11 | $C_{14}D_{16}H_{12}$ | 25 | $C_{14}D_{12}H_{16}$ | 30 | $C_{14}D_8H_{20}$                                                                                                                                                                                                                             | 20             | $C_{14}D_4H_{24}$                                                                                                                                                                                                                                                                                                     | 7                 | $C_{14}H_{28}$                                                                                                                                                                                                                                                                                                                                                                      | 1                 | <table border="1"> <tr><td><math>C_{14}D_{24}H_4</math></td><td>1</td></tr> <tr><td><math>C_{14}D_{20}H_8</math></td><td>6</td></tr> <tr><td><math>C_{14}D_{16}H_{12}</math></td><td>15</td></tr> <tr><td><math>C_{14}D_{12}H_{16}</math></td><td>20</td></tr> <tr><td><math>C_{14}D_8H_{20}</math></td><td>15</td></tr> <tr><td><math>C_{14}D_4H_{24}</math></td><td>6</td></tr> <tr><td><math>C_{14}H_{28}</math></td><td>1</td></tr> </table> | $C_{14}D_{24}H_4$ | 1 | $C_{14}D_{20}H_8$    | 6  | $C_{14}D_{16}H_{12}$ | 15 | $C_{14}D_{12}H_{16}$ | 20 | $C_{14}D_8H_{20}$ | 15 | $C_{14}D_4H_{24}$ | 6 | $C_{14}H_{28}$ | 1 |
| $C_{14}D_{24}H_4$    | 2                                                                                                                                                                                                                                                                                                                                                                                                                                                 |                      |   |                   |    |                      |    |                      |    |                                                                                                                                                                                                                                               |                |                                                                                                                                                                                                                                                                                                                       |                   |                                                                                                                                                                                                                                                                                                                                                                                     |                   |                                                                                                                                                                                                                                                                                                                                                                                                                                                  |                   |   |                      |    |                      |    |                      |    |                   |    |                   |   |                |   |
| $C_{14}D_{20}H_8$    | 11                                                                                                                                                                                                                                                                                                                                                                                                                                                |                      |   |                   |    |                      |    |                      |    |                                                                                                                                                                                                                                               |                |                                                                                                                                                                                                                                                                                                                       |                   |                                                                                                                                                                                                                                                                                                                                                                                     |                   |                                                                                                                                                                                                                                                                                                                                                                                                                                                  |                   |   |                      |    |                      |    |                      |    |                   |    |                   |   |                |   |
| $C_{14}D_{16}H_{12}$ | 25                                                                                                                                                                                                                                                                                                                                                                                                                                                |                      |   |                   |    |                      |    |                      |    |                                                                                                                                                                                                                                               |                |                                                                                                                                                                                                                                                                                                                       |                   |                                                                                                                                                                                                                                                                                                                                                                                     |                   |                                                                                                                                                                                                                                                                                                                                                                                                                                                  |                   |   |                      |    |                      |    |                      |    |                   |    |                   |   |                |   |
| $C_{14}D_{12}H_{16}$ | 30                                                                                                                                                                                                                                                                                                                                                                                                                                                |                      |   |                   |    |                      |    |                      |    |                                                                                                                                                                                                                                               |                |                                                                                                                                                                                                                                                                                                                       |                   |                                                                                                                                                                                                                                                                                                                                                                                     |                   |                                                                                                                                                                                                                                                                                                                                                                                                                                                  |                   |   |                      |    |                      |    |                      |    |                   |    |                   |   |                |   |
| $C_{14}D_8H_{20}$    | 20                                                                                                                                                                                                                                                                                                                                                                                                                                                |                      |   |                   |    |                      |    |                      |    |                                                                                                                                                                                                                                               |                |                                                                                                                                                                                                                                                                                                                       |                   |                                                                                                                                                                                                                                                                                                                                                                                     |                   |                                                                                                                                                                                                                                                                                                                                                                                                                                                  |                   |   |                      |    |                      |    |                      |    |                   |    |                   |   |                |   |
| $C_{14}D_4H_{24}$    | 7                                                                                                                                                                                                                                                                                                                                                                                                                                                 |                      |   |                   |    |                      |    |                      |    |                                                                                                                                                                                                                                               |                |                                                                                                                                                                                                                                                                                                                       |                   |                                                                                                                                                                                                                                                                                                                                                                                     |                   |                                                                                                                                                                                                                                                                                                                                                                                                                                                  |                   |   |                      |    |                      |    |                      |    |                   |    |                   |   |                |   |
| $C_{14}H_{28}$       | 1                                                                                                                                                                                                                                                                                                                                                                                                                                                 |                      |   |                   |    |                      |    |                      |    |                                                                                                                                                                                                                                               |                |                                                                                                                                                                                                                                                                                                                       |                   |                                                                                                                                                                                                                                                                                                                                                                                     |                   |                                                                                                                                                                                                                                                                                                                                                                                                                                                  |                   |   |                      |    |                      |    |                      |    |                   |    |                   |   |                |   |
| $C_{14}D_{24}H_4$    | 1                                                                                                                                                                                                                                                                                                                                                                                                                                                 |                      |   |                   |    |                      |    |                      |    |                                                                                                                                                                                                                                               |                |                                                                                                                                                                                                                                                                                                                       |                   |                                                                                                                                                                                                                                                                                                                                                                                     |                   |                                                                                                                                                                                                                                                                                                                                                                                                                                                  |                   |   |                      |    |                      |    |                      |    |                   |    |                   |   |                |   |
| $C_{14}D_{20}H_8$    | 6                                                                                                                                                                                                                                                                                                                                                                                                                                                 |                      |   |                   |    |                      |    |                      |    |                                                                                                                                                                                                                                               |                |                                                                                                                                                                                                                                                                                                                       |                   |                                                                                                                                                                                                                                                                                                                                                                                     |                   |                                                                                                                                                                                                                                                                                                                                                                                                                                                  |                   |   |                      |    |                      |    |                      |    |                   |    |                   |   |                |   |
| $C_{14}D_{16}H_{12}$ | 15                                                                                                                                                                                                                                                                                                                                                                                                                                                |                      |   |                   |    |                      |    |                      |    |                                                                                                                                                                                                                                               |                |                                                                                                                                                                                                                                                                                                                       |                   |                                                                                                                                                                                                                                                                                                                                                                                     |                   |                                                                                                                                                                                                                                                                                                                                                                                                                                                  |                   |   |                      |    |                      |    |                      |    |                   |    |                   |   |                |   |
| $C_{14}D_{12}H_{16}$ | 20                                                                                                                                                                                                                                                                                                                                                                                                                                                |                      |   |                   |    |                      |    |                      |    |                                                                                                                                                                                                                                               |                |                                                                                                                                                                                                                                                                                                                       |                   |                                                                                                                                                                                                                                                                                                                                                                                     |                   |                                                                                                                                                                                                                                                                                                                                                                                                                                                  |                   |   |                      |    |                      |    |                      |    |                   |    |                   |   |                |   |
| $C_{14}D_8H_{20}$    | 15                                                                                                                                                                                                                                                                                                                                                                                                                                                |                      |   |                   |    |                      |    |                      |    |                                                                                                                                                                                                                                               |                |                                                                                                                                                                                                                                                                                                                       |                   |                                                                                                                                                                                                                                                                                                                                                                                     |                   |                                                                                                                                                                                                                                                                                                                                                                                                                                                  |                   |   |                      |    |                      |    |                      |    |                   |    |                   |   |                |   |
| $C_{14}D_4H_{24}$    | 6                                                                                                                                                                                                                                                                                                                                                                                                                                                 |                      |   |                   |    |                      |    |                      |    |                                                                                                                                                                                                                                               |                |                                                                                                                                                                                                                                                                                                                       |                   |                                                                                                                                                                                                                                                                                                                                                                                     |                   |                                                                                                                                                                                                                                                                                                                                                                                                                                                  |                   |   |                      |    |                      |    |                      |    |                   |    |                   |   |                |   |
| $C_{14}H_{28}$       | 1                                                                                                                                                                                                                                                                                                                                                                                                                                                 |                      |   |                   |    |                      |    |                      |    |                                                                                                                                                                                                                                               |                |                                                                                                                                                                                                                                                                                                                       |                   |                                                                                                                                                                                                                                                                                                                                                                                     |                   |                                                                                                                                                                                                                                                                                                                                                                                                                                                  |                   |   |                      |    |                      |    |                      |    |                   |    |                   |   |                |   |

**Figure S11.** All expected isotopomers of 1-C<sub>8</sub>, 1-C<sub>10</sub>, 1-C<sub>12</sub>, 1-C<sub>14</sub> and their statistical distribution for a metallacycle mechanism (left) and a Cossee-Arlman mechanism (right) involving strong KIE.



## References

1. R. Robinson, D. S. McGuinness and B. F. Yates, *ACS Catal.*, 2013, **3**, 3006-3015.
2. V. Tognetti, A. Buchard, A. Auffrant, I. Ciofini, P. Le Floch and C. Adamo, *J. Mol. Model.*, 2013, **19**, 2107-2118.
3. J. Zhang, P. Qiu, Z. Liu, B. Liu, R. J. Batrice, M. Botoshansky and M. S. Eisen, *ACS Catal.*, 2015, **5**, 3562-3574.
4. L. Liu, Z. Liu, R. Cheng, X. He and B. Liu, *Organometallics*, 2021, **40**, 1682-1691.
5. J. N. Harvey, F. Himo, F. Maseras and L. Perrin, *ACS Catal.*, 2019, **9**, 6803-6813.
6. A. K. Tomov, J. J. Chirinos, D. J. Jones, R. J. Long and V. C. Gibson, *J. Am. Chem. Soc.*, 2005, **127**, 10166-10167.

## S9. List of Cartesian Coordinates

<sup>3</sup>1A

Geometry with 39 atoms:

Total energy: -2049.813599870

|    |           |           |           |
|----|-----------|-----------|-----------|
| C  | -4.865876 | -2.726193 | -0.000117 |
| C  | -3.521136 | -2.364557 | -0.000227 |
| C  | -3.225042 | -0.994813 | -0.000016 |
| C  | -4.263304 | -0.029317 | 0.000272  |
| C  | -5.613694 | -0.391302 | 0.000400  |
| C  | -5.893937 | -1.756851 | 0.000199  |
| H  | -5.135441 | -3.784755 | -0.000243 |
| H  | -2.719378 | -3.105120 | -0.000482 |
| H  | -6.408744 | 0.356655  | 0.000628  |
| H  | -6.935459 | -2.086178 | 0.000317  |
| N  | -3.627631 | 1.204147  | 0.000476  |
| H  | -4.082058 | 2.111716  | 0.000789  |
| N  | -2.010273 | -0.325760 | 0.000033  |
| C  | -2.289533 | 0.991331  | 0.000107  |
| C  | 1.184853  | 1.928915  | -0.000061 |
| C  | 1.214161  | 3.322090  | -0.000312 |
| C  | 0.000004  | 4.027192  | -0.000434 |
| C  | -1.214153 | 3.322102  | -0.000314 |
| C  | -1.184858 | 1.928922  | -0.000062 |
| N  | -0.000003 | 1.242653  | 0.000031  |
| H  | 0.000010  | 5.118104  | -0.000490 |
| H  | 2.167045  | 3.855259  | -0.000370 |
| H  | -2.167034 | 3.855276  | -0.000374 |
| C  | 2.289526  | 0.991316  | 0.000113  |
| C  | 3.521150  | -2.364560 | -0.000235 |
| C  | 4.865893  | -2.726186 | -0.000129 |
| C  | 5.893948  | -1.756837 | 0.000192  |
| C  | 5.613696  | -0.391290 | 0.000403  |
| C  | 4.263303  | -0.029316 | 0.000278  |
| C  | 3.225046  | -0.994818 | -0.000014 |
| H  | 2.719398  | -3.105128 | -0.000496 |
| H  | 5.135466  | -3.784746 | -0.000265 |
| H  | 6.935472  | -2.086157 | 0.000304  |
| H  | 6.408740  | 0.356673  | 0.000635  |
| N  | 3.627620  | 1.204143  | 0.000491  |
| H  | 4.082041  | 2.111715  | 0.000810  |
| N  | 2.010273  | -0.325774 | 0.000041  |
| Cr | -0.000011 | -0.762973 | -0.000315 |
| H  | 0.000009  | -2.412797 | -0.000964 |

<sup>3</sup>2A

Geometry with 45 atoms:

Total energy: -2128.397355920

|   |           |           |           |
|---|-----------|-----------|-----------|
| C | -4.908137 | -2.589245 | -0.334534 |
| C | -3.561042 | -2.244344 | -0.312241 |
| C | -3.250858 | -0.878962 | -0.222687 |
| C | -4.278991 | 0.097011  | -0.164341 |
| C | -5.634444 | -0.249764 | -0.188632 |

|    |           |           |           |
|----|-----------|-----------|-----------|
| C  | -5.926786 | -1.608811 | -0.273011 |
| H  | -5.191190 | -3.641963 | -0.404367 |
| H  | -2.766064 | -2.989736 | -0.368123 |
| H  | -6.422394 | 0.504333  | -0.144686 |
| H  | -6.971432 | -1.927479 | -0.294655 |
| N  | -3.626816 | 1.317306  | -0.087709 |
| H  | -4.069005 | 2.229625  | -0.037942 |
| N  | -2.030724 | -0.231103 | -0.176125 |
| C  | -2.291476 | 1.079200  | -0.099886 |
| C  | 1.176016  | 2.017167  | -0.037905 |
| C  | 1.213426  | 3.413824  | 0.000640  |
| C  | -0.000006 | 4.112670  | 0.027816  |
| C  | -1.213428 | 3.413804  | 0.000580  |
| C  | -1.175996 | 2.017146  | -0.037959 |
| N  | 0.000013  | 1.349109  | -0.032590 |
| H  | -0.000016 | 5.203647  | 0.060101  |
| H  | 2.165875  | 3.946857  | 0.003112  |
| H  | -2.165883 | 3.946826  | 0.003004  |
| C  | 2.291502  | 1.079234  | -0.099800 |
| C  | 3.560994  | -2.244347 | -0.312153 |
| C  | 4.908081  | -2.589273 | -0.334509 |
| C  | 5.926751  | -1.608856 | -0.273057 |
| C  | 5.634439  | -0.249802 | -0.188686 |
| C  | 4.278993  | 0.096999  | -0.164332 |
| C  | 3.250842  | -0.878958 | -0.222612 |
| H  | 2.765987  | -2.989711 | -0.367980 |
| H  | 5.191110  | -3.641998 | -0.404339 |
| H  | 6.971390  | -1.927544 | -0.294753 |
| H  | 6.422406  | 0.504280  | -0.144793 |
| N  | 3.626846  | 1.317312  | -0.087688 |
| H  | 4.069055  | 2.229623  | -0.037976 |
| N  | 2.030724  | -0.231068 | -0.176002 |
| Cr | 0.000096  | -0.699449 | -0.137729 |
| H  | 0.000803  | -2.220919 | -0.729001 |
| C  | -0.000212 | -1.914773 | 1.610565  |
| H  | 0.922824  | -2.501838 | 1.613015  |
| H  | -0.923427 | -2.501565 | 1.612684  |
| C  | -0.000086 | -0.584121 | 2.033516  |
| H  | -0.924832 | -0.100549 | 2.361051  |
| H  | 0.924725  | -0.100828 | 2.361280  |

<sup>3</sup>TS[2A-3A]

Geometry with 45 atoms:

Total energy: -2128.392994380

|   |          |           |           |
|---|----------|-----------|-----------|
| C | 4.904634 | -2.568444 | -0.347965 |
| C | 3.557232 | -2.217678 | -0.326442 |
| C | 3.247921 | -0.853767 | -0.226640 |
| C | 4.279414 | 0.117822  | -0.157738 |
| C | 5.632795 | -0.233070 | -0.181135 |
| C | 5.924472 | -1.592949 | -0.275668 |
| H | 5.183287 | -3.621870 | -0.424889 |

|    |           |           |           |    |           |           |           |
|----|-----------|-----------|-----------|----|-----------|-----------|-----------|
| H  | 2.764906  | -2.965383 | -0.390864 | N  | -2.062908 | -0.096423 | -0.078858 |
| H  | 6.422067  | 0.519209  | -0.128953 | C  | -2.295778 | 1.219875  | -0.013332 |
| H  | 6.968689  | -1.913005 | -0.296236 | C  | 1.174845  | 2.156905  | 0.017023  |
| N  | 3.632551  | 1.341178  | -0.072766 | C  | 1.215635  | 3.552639  | 0.105219  |
| H  | 4.078344  | 2.251038  | -0.016516 | C  | 0.000680  | 4.247823  | 0.146541  |
| N  | 2.028409  | -0.200366 | -0.177758 | C  | -1.214446 | 3.552942  | 0.105443  |
| C  | 2.294679  | 1.112721  | -0.090806 | C  | -1.173998 | 2.157200  | 0.017216  |
| C  | -1.183108 | 2.041847  | -0.022447 | N  | 0.000341  | 1.499125  | -0.027617 |
| C  | -1.213335 | 3.432978  | 0.059728  | H  | 0.000822  | 5.337226  | 0.216657  |
| C  | 0.000006  | 4.136953  | 0.104468  | H  | 2.166400  | 4.087198  | 0.144787  |
| C  | 1.213341  | 3.432979  | 0.059791  | H  | -2.165096 | 4.087702  | 0.145198  |
| C  | 1.183118  | 2.041842  | -0.022388 | C  | 2.296434  | 1.219326  | -0.013566 |
| N  | 0.000003  | 1.357279  | -0.051008 | C  | 3.656236  | -2.073411 | -0.092648 |
| H  | 0.000005  | 5.225945  | 0.169244  | C  | 5.011565  | -2.381972 | -0.053293 |
| H  | -2.167097 | 3.963844  | 0.084563  | C  | 6.002585  | -1.374627 | 0.017485  |
| H  | 2.167104  | 3.963841  | 0.084676  | C  | 5.670715  | -0.023299 | 0.055504  |
| C  | -2.294674 | 1.112724  | -0.090900 | C  | 4.306399  | 0.285867  | 0.016561  |
| C  | -3.557229 | -2.217674 | -0.326479 | C  | 3.302547  | -0.714695 | -0.060306 |
| C  | -4.904631 | -2.568441 | -0.347929 | H  | 2.891138  | -2.847950 | -0.142075 |
| C  | -5.924469 | -1.592947 | -0.275592 | H  | 5.322400  | -3.428838 | -0.076707 |
| C  | -5.632789 | -0.233067 | -0.181087 | H  | 7.055097  | -1.665811 | 0.045648  |
| C  | -4.279408 | 0.117827  | -0.157762 | H  | 6.435032  | 0.753864  | 0.113351  |
| C  | -3.247917 | -0.853760 | -0.226707 | N  | 3.624541  | 1.489496  | 0.044653  |
| H  | -2.764903 | -2.965376 | -0.390928 | H  | 4.044465  | 2.412138  | 0.097044  |
| H  | -5.183287 | -3.621869 | -0.424823 | N  | 2.063364  | -0.096959 | -0.078876 |
| H  | -6.968685 | -1.913005 | -0.296100 | Cr | 0.000070  | -0.591623 | -0.254765 |
| H  | -6.422061 | 0.519210  | -0.128870 | C  | -0.001032 | -2.660079 | -0.388370 |
| N  | -3.632542 | 1.341183  | -0.072812 | H  | -0.878664 | -2.968570 | -0.991675 |
| H  | -4.078334 | 2.251041  | -0.016527 | H  | 0.878335  | -2.970241 | -0.988226 |
| N  | -2.028405 | -0.200358 | -0.177878 | C  | -0.004186 | -3.395824 | 0.957245  |
| Cr | 0.000005  | -0.637322 | -0.144368 | H  | -0.005236 | -4.499134 | 0.857587  |
| C  | -0.000068 | -0.918678 | 1.986382  | H  | -0.890058 | -3.138086 | 1.566561  |
| H  | 0.927592  | -0.481978 | 2.366075  | H  | 0.880292  | -3.140029 | 1.569405  |
| H  | -0.927799 | -0.482088 | 2.366029  |    |           |           |           |
| C  | 0.000012  | -2.207980 | 1.441236  |    |           |           |           |
| H  | -0.000142 | -2.243152 | -0.428725 |    |           |           |           |
| H  | -0.919843 | -2.799315 | 1.419858  |    |           |           |           |
| H  | 0.919944  | -2.799197 | 1.419851  |    |           |           |           |

<sup>33</sup>A

Geometry with 45 atoms:  
 Total energy: -2128.406344480

|   |           |           |           |
|---|-----------|-----------|-----------|
| C | -5.011496 | -2.380973 | -0.053899 |
| C | -3.656115 | -2.072632 | -0.093151 |
| C | -3.302198 | -0.713987 | -0.060417 |
| C | -4.305882 | 0.286728  | 0.016650  |
| C | -5.670252 | -0.022218 | 0.055494  |
| C | -6.002348 | -1.373481 | 0.017137  |
| H | -5.322509 | -3.427780 | -0.077624 |
| H | -2.891137 | -2.847257 | -0.142812 |
| H | -6.434447 | 0.755053  | 0.113508  |
| H | -7.054911 | -1.664489 | 0.045202  |
| N | -3.623831 | 1.490245  | 0.044958  |
| H | -4.043611 | 2.412943  | 0.097509  |

<sup>34</sup>A

Geometry with 51 atoms:  
 Total energy: -2206.984166580

|   |           |           |           |
|---|-----------|-----------|-----------|
| C | -5.011003 | -2.393998 | 0.021518  |
| C | -3.655266 | -2.078036 | 0.011783  |
| C | -3.305955 | -0.719880 | -0.035422 |
| C | -4.315093 | 0.277565  | -0.068332 |
| C | -5.677572 | -0.037855 | -0.059679 |
| C | -6.005842 | -1.391215 | -0.014385 |
| H | -5.315803 | -3.442275 | 0.058728  |
| H | -2.888184 | -2.851821 | 0.039921  |
| H | -6.446005 | 0.737109  | -0.084562 |
| H | -7.058084 | -1.684441 | -0.004732 |
| N | -3.640547 | 1.486265  | -0.100789 |
| H | -4.065452 | 2.407548  | -0.118060 |
| N | -2.069279 | -0.094401 | -0.047978 |
| C | -2.307807 | 1.225631  | -0.083594 |
| C | 1.170479  | 2.152903  | -0.062241 |
| C | 1.201046  | 3.546852  | -0.127344 |
| C | -0.011235 | 4.249852  | -0.159828 |

|    |           |           |           |
|----|-----------|-----------|-----------|
| C  | -1.221533 | 3.542571  | -0.145835 |
| C  | -1.187364 | 2.148918  | -0.079631 |
| N  | -0.007804 | 1.468172  | -0.009949 |
| H  | -0.012782 | 5.339703  | -0.210503 |
| H  | 2.153920  | 4.079181  | -0.161891 |
| H  | -2.175652 | 4.071393  | -0.195481 |
| C  | 2.293624  | 1.233137  | -0.054543 |
| C  | 3.651649  | -2.066789 | 0.030441  |
| C  | 5.008406  | -2.378634 | 0.027156  |
| C  | 5.999904  | -1.372809 | -0.014563 |
| C  | 5.667182  | -0.020321 | -0.052859 |
| C  | 4.303740  | 0.290934  | -0.049048 |
| C  | 3.297902  | -0.709601 | -0.010287 |
| H  | 2.887141  | -2.842809 | 0.062545  |
| H  | 5.316644  | -3.426100 | 0.058031  |
| H  | 7.053062  | -1.662878 | -0.015912 |
| H  | 6.432964  | 0.757072  | -0.083156 |
| N  | 3.625430  | 1.497559  | -0.077046 |
| H  | 4.047641  | 2.419944  | -0.100432 |
| N  | 2.059092  | -0.087945 | -0.016455 |
| Cr | -0.001895 | -0.576333 | 0.020415  |
| C  | 0.024930  | -2.460059 | -0.817211 |
| H  | -0.899305 | -3.034673 | -0.669291 |
| H  | 0.883606  | -3.092774 | -0.557243 |
| C  | 0.129725  | -1.815367 | -2.191274 |
| H  | 1.073087  | -2.040292 | -2.712933 |
| H  | -0.721929 | -2.037520 | -2.853244 |
| C  | -0.021907 | -1.689582 | 1.961203  |
| H  | -0.947225 | -2.272189 | 1.951117  |
| H  | 0.906808  | -2.266482 | 1.974911  |
| C  | -0.029620 | -0.347141 | 2.297847  |
| H  | 0.894766  | 0.173368  | 2.562785  |
| H  | -0.962119 | 0.169035  | 2.541670  |
| H  | 0.129767  | -0.678103 | -2.149942 |

<sup>3</sup>TS[4A-5A]

Geometry with 51 atoms:

Total energy: -2206.968771500

|   |           |           |           |
|---|-----------|-----------|-----------|
| C | -4.965138 | -2.323744 | -0.055370 |
| C | -3.608218 | -1.999969 | -0.061358 |
| C | -3.260301 | -0.642055 | -0.020412 |
| C | -4.274707 | 0.350669  | 0.014040  |
| C | -5.634020 | 0.028720  | 0.020405  |
| C | -5.961686 | -1.327297 | -0.013176 |
| H | -5.264019 | -3.374030 | -0.085028 |
| H | -2.846020 | -2.777891 | -0.100713 |
| H | -6.404233 | 0.801941  | 0.048441  |
| H | -7.013331 | -1.622567 | -0.008757 |
| N | -3.608980 | 1.565525  | 0.032963  |
| H | -4.039989 | 2.483366  | 0.053620  |
| N | -2.025943 | -0.007209 | -0.017951 |
| C | -2.271914 | 1.318157  | 0.011450  |
| C | 1.226941  | 2.198713  | -0.063653 |
| C | 1.262358  | 3.589256  | -0.077181 |

|    |           |           |           |
|----|-----------|-----------|-----------|
| C  | 0.056790  | 4.313135  | -0.042312 |
| C  | -1.162829 | 3.615945  | -0.002144 |
| C  | -1.155341 | 2.224334  | 0.004635  |
| N  | 0.029664  | 1.513262  | -0.018214 |
| H  | 0.068609  | 5.403625  | -0.050330 |
| H  | 2.220346  | 4.112676  | -0.115512 |
| H  | -2.111264 | 4.158194  | 0.017161  |
| C  | 2.327725  | 1.271618  | -0.088085 |
| C  | 3.647115  | -2.051631 | 0.027100  |
| C  | 5.001797  | -2.381728 | 0.048331  |
| C  | 6.003770  | -1.390801 | 0.007037  |
| C  | 5.681345  | -0.034760 | -0.048077 |
| C  | 4.323156  | 0.291912  | -0.066677 |
| C  | 3.301433  | -0.694066 | -0.041634 |
| H  | 2.883716  | -2.828095 | 0.072530  |
| H  | 5.294205  | -3.432888 | 0.102179  |
| H  | 7.054049  | -1.690451 | 0.024686  |
| H  | 6.454080  | 0.736126  | -0.070409 |
| N  | 3.666368  | 1.510041  | -0.097792 |
| H  | 4.103582  | 2.425169  | -0.102688 |
| N  | 2.069044  | -0.051869 | -0.069174 |
| Cr | 0.006719  | -0.438016 | -0.014808 |
| C  | -0.400630 | -1.832071 | -1.940895 |
| H  | -0.097283 | -0.752317 | -2.039305 |
| H  | -1.481373 | -1.866418 | -2.130250 |
| C  | 0.003099  | -2.552935 | -0.655342 |
| H  | -0.619009 | -3.441270 | -0.515478 |
| H  | 1.054542  | -2.856919 | -0.692506 |
| C  | -0.189907 | -2.259666 | 1.415279  |
| H  | 0.585132  | -3.022339 | 1.531312  |
| H  | -1.205165 | -2.657447 | 1.482153  |
| C  | 0.037422  | -0.964070 | 1.973594  |
| H  | -0.799247 | -0.455803 | 2.461970  |
| H  | 1.027212  | -0.739945 | 2.383036  |
| H  | 0.133589  | -2.284551 | -2.792859 |

<sup>3</sup>5A

Geometry with 51 atoms:

Total energy: -2206.982347080

|   |           |           |           |
|---|-----------|-----------|-----------|
| C | 5.049562  | -2.088608 | -0.708796 |
| C | 3.694815  | -1.780447 | -0.656849 |
| C | 3.345174  | -0.455660 | -0.347155 |
| C | 4.354433  | 0.512125  | -0.102734 |
| C | 5.718484  | 0.203749  | -0.156005 |
| C | 6.045379  | -1.113796 | -0.462870 |
| H | 5.356110  | -3.109955 | -0.945572 |
| H | 2.928114  | -2.529978 | -0.847628 |
| H | 6.485603  | 0.956888  | 0.032630  |
| H | 7.097317  | -1.403625 | -0.515870 |
| N | 3.677190  | 1.688577  | 0.164721  |
| H | 4.099713  | 2.585851  | 0.380516  |
| N | 2.106987  | 0.152952  | -0.221758 |
| C | 2.348592  | 1.432070  | 0.082901  |
| C | -1.104878 | 2.417060  | 0.252229  |

|    |           |           |           |    |           |           |           |
|----|-----------|-----------|-----------|----|-----------|-----------|-----------|
| C  | -1.120812 | 3.790913  | 0.537312  | C  | -1.327472 | 2.268473  | 0.098125  |
| C  | 0.105467  | 4.442883  | 0.691624  | C  | -1.403525 | 3.642343  | 0.311257  |
| C  | 1.309816  | 3.736308  | 0.562989  | C  | -0.214831 | 4.380118  | 0.437156  |
| C  | 1.239331  | 2.369136  | 0.278035  | C  | 1.022161  | 3.723973  | 0.334460  |
| N  | 0.056117  | 1.752678  | 0.134107  | C  | 1.041940  | 2.347169  | 0.120062  |
| H  | 0.126686  | 5.512478  | 0.910272  | N  | -0.118820 | 1.625338  | 0.018862  |
| H  | -2.060821 | 4.338168  | 0.631690  | H  | -0.252499 | 5.457106  | 0.606196  |
| H  | 2.270482  | 4.242099  | 0.676160  | H  | -2.374497 | 4.137937  | 0.374691  |
| C  | -2.240036 | 1.526449  | 0.034355  | H  | 1.955290  | 4.285857  | 0.415135  |
| C  | -3.680799 | -1.648329 | -0.702519 | C  | -2.404467 | 1.317040  | -0.077980 |
| C  | -5.044031 | -1.914090 | -0.770035 | C  | -3.538195 | -2.025647 | -0.621070 |
| C  | -6.010512 | -0.904888 | -0.548734 | C  | -4.871535 | -2.420992 | -0.704650 |
| C  | -5.644105 | 0.404185  | -0.250062 | C  | -5.927654 | -1.491412 | -0.578513 |
| C  | -4.271610 | 0.668868  | -0.180057 | C  | -5.688033 | -0.134141 | -0.365095 |
| C  | -3.290984 | -0.332890 | -0.402976 | C  | -4.349797 | 0.260890  | -0.278753 |
| H  | -2.935263 | -2.424445 | -0.870021 | C  | -3.282412 | -0.665031 | -0.403323 |
| H  | -5.380018 | -2.927986 | -0.998714 | H  | -2.716519 | -2.735940 | -0.727409 |
| H  | -7.070717 | -1.160440 | -0.612952 | H  | -5.108992 | -3.473662 | -0.874551 |
| H  | -6.388143 | 1.184088  | -0.078106 | H  | -6.958796 | -1.844572 | -0.651780 |
| N  | -3.563294 | 1.824438  | 0.092154  | H  | -6.505390 | 0.583331  | -0.271309 |
| H  | -3.961097 | 2.735132  | 0.296914  | N  | -3.750625 | 1.495460  | -0.076112 |
| N  | -2.033463 | 0.235762  | -0.263866 | H  | -4.230949 | 2.381022  | 0.044132  |
| Cr | 0.014257  | -0.308210 | -0.391933 | N  | -2.088891 | 0.024800  | -0.272245 |
| C  | -0.761970 | -3.179020 | 1.386119  | Cr | -0.054909 | -0.351572 | -0.213236 |
| H  | -1.745025 | -3.453625 | 0.963110  | C  | -0.095667 | -0.664706 | 1.932484  |
| H  | -0.873033 | -2.129322 | 1.724069  | H  | 0.847710  | -0.279620 | 2.332249  |
| C  | 0.035438  | -2.319874 | -0.913385 | H  | -1.003308 | -0.144754 | 2.247668  |
| H  | 0.825203  | -2.456687 | -1.680065 | C  | -0.160972 | -1.971759 | 1.457062  |
| H  | -0.905472 | -2.618680 | -1.416123 | H  | -0.077652 | -1.945688 | -0.570838 |
| C  | 0.302467  | -3.251062 | 0.282356  | C  | 0.973222  | -2.954630 | 1.594737  |
| H  | 0.390126  | -4.309970 | -0.037806 | H  | 0.930966  | -3.294241 | 2.648238  |
| H  | 1.283243  | -3.009155 | 0.737170  | H  | 1.936320  | -2.429555 | 1.494472  |
| C  | -0.457431 | -4.065470 | 2.592832  | C  | 0.911422  | -4.174512 | 0.681831  |
| H  | 0.500133  | -3.784249 | 3.064322  | H  | -0.035921 | -4.722972 | 0.814456  |
| H  | -1.242339 | -3.991921 | 3.363703  | H  | 0.978281  | -3.887740 | -0.379418 |
| H  | -0.378475 | -5.126144 | 2.299741  | H  | 1.734100  | -4.871957 | 0.903742  |
|    |           |           |           | H  | -1.155254 | -2.414574 | 1.324943  |

<sup>3</sup>TS[5A-12A]

Geometry with 51 atoms:

|               |                 |           |           |
|---------------|-----------------|-----------|-----------|
| Total energy: | -2206.977801190 |           |           |
| C             | 4.929410        | -2.032583 | -0.835993 |
| C             | 3.570745        | -1.750956 | -0.710586 |
| C             | 3.207658        | -0.425407 | -0.434809 |
| C             | 4.200479        | 0.578982  | -0.303480 |
| C             | 5.564352        | 0.298574  | -0.428608 |
| C             | 5.909767        | -1.025780 | -0.695158 |
| H             | 5.246168        | -3.055743 | -1.050783 |
| H             | 2.810838        | -2.524255 | -0.825636 |
| H             | 6.321581        | 1.078212  | -0.326120 |
| H             | 6.964376        | -1.290248 | -0.801091 |
| N             | 3.509648        | 1.755737  | -0.060024 |
| H             | 3.919755        | 2.675228  | 0.064738  |
| N             | 1.963316        | 0.161498  | -0.260281 |
| C             | 2.181707        | 1.472450  | -0.050066 |

<sup>3</sup>6A

Geometry with 57 atoms:

|               |                 |           |           |
|---------------|-----------------|-----------|-----------|
| Total energy: | -2285.560499710 |           |           |
| C             | 4.986475        | -2.310359 | -0.575786 |
| C             | 3.635139        | -1.980192 | -0.553852 |
| C             | 3.300276        | -0.636410 | -0.323401 |
| C             | 4.320225        | 0.332179  | -0.132513 |
| C             | 5.679398        | 0.001681  | -0.153622 |
| C             | 5.992303        | -1.336792 | -0.376780 |
| H             | 5.280473        | -3.347680 | -0.751036 |
| H             | 2.860994        | -2.731261 | -0.708719 |
| H             | 6.455215        | 0.754849  | -0.004352 |
| H             | 7.040752        | -1.642453 | -0.401035 |
| N             | 3.658910        | 1.533930  | 0.054704  |
| H             | 4.093051        | 2.437439  | 0.212456  |
| N             | 2.071182        | -0.002501 | -0.241361 |

|    |           |           |           |    |           |           |           |
|----|-----------|-----------|-----------|----|-----------|-----------|-----------|
| C  | 2.325830  | 1.293265  | -0.019349 | H  | 5.250975  | -3.210187 | -0.727662 |
| C  | -1.133740 | 2.252083  | 0.091985  | H  | 2.837414  | -2.581469 | -0.644806 |
| C  | -1.158648 | 3.620857  | 0.372388  | H  | 6.448262  | 0.888256  | 0.001563  |
| C  | 0.060279  | 4.296750  | 0.512129  | H  | 7.023905  | -1.509506 | -0.413369 |
| C  | 1.266467  | 3.594037  | 0.392056  | N  | 3.661991  | 1.681823  | 0.115240  |
| C  | 1.216336  | 2.226753  | 0.110165  | H  | 4.104016  | 2.579184  | 0.281500  |
| N  | 0.035800  | 1.587724  | -0.065091 | N  | 2.060289  | 0.155516  | -0.181134 |
| H  | 0.070257  | 5.366311  | 0.728842  | C  | 2.321781  | 1.455702  | 0.061409  |
| H  | -2.107098 | 4.150029  | 0.487331  | C  | -1.167341 | 2.347016  | 0.256696  |
| H  | 2.224941  | 4.101313  | 0.521704  | C  | -1.191997 | 3.708159  | 0.542478  |
| C  | -2.258543 | 1.340373  | -0.054143 | C  | 0.020192  | 4.410346  | 0.668329  |
| C  | -3.605515 | -1.919567 | -0.574732 | C  | 1.233981  | 3.719103  | 0.511769  |
| C  | -4.960781 | -2.230442 | -0.621535 | C  | 1.214350  | 2.356577  | 0.229838  |
| C  | -5.955942 | -1.238366 | -0.463206 | N  | 0.023018  | 1.670139  | 0.091395  |
| C  | -5.628878 | 0.098944  | -0.252763 | H  | 0.018245  | 5.478326  | 0.889034  |
| C  | -4.265851 | 0.410284  | -0.205422 | H  | -2.147162 | 4.224094  | 0.668160  |
| C  | -3.258427 | -0.576328 | -0.363793 | H  | 2.187600  | 4.242857  | 0.613912  |
| H  | -2.835562 | -2.681384 | -0.692113 | C  | -2.276619 | 1.447561  | 0.086702  |
| H  | -5.266758 | -3.266453 | -0.783402 | C  | -3.646051 | -1.766279 | -0.682991 |
| H  | -7.008098 | -1.528790 | -0.507273 | C  | -5.005819 | -2.065132 | -0.765200 |
| H  | -6.397179 | 0.864733  | -0.131037 | C  | -5.992544 | -1.086910 | -0.527503 |
| N  | -3.589085 | 1.603127  | -0.013097 | C  | -5.648449 | 0.226105  | -0.205993 |
| H  | -4.011680 | 2.514865  | 0.127829  | C  | -4.285361 | 0.521265  | -0.126567 |
| N  | -2.021777 | 0.038653  | -0.263238 | C  | -3.278052 | -0.454382 | -0.350438 |
| Cr | 0.012624  | -0.440447 | -0.385850 | H  | -2.896300 | -2.530979 | -0.879992 |
| C  | 0.243237  | -1.399694 | 2.606267  | H  | -5.313649 | -3.081092 | -1.022943 |
| H  | 0.268635  | -0.377581 | 2.169103  | H  | -7.047408 | -1.360949 | -0.601056 |
| H  | 1.295804  | -1.734995 | 2.612738  | H  | -6.408051 | 0.989841  | -0.028668 |
| C  | -0.075902 | -2.404251 | 0.254696  | N  | -3.611106 | 1.698621  | 0.145971  |
| H  | 0.944251  | -2.827567 | 0.230345  | H  | -4.034606 | 2.600018  | 0.336487  |
| H  | -0.706912 | -3.082469 | -0.342602 | N  | -2.035078 | 0.150950  | -0.197874 |
| C  | -0.578680 | -2.337033 | 1.706823  | Cr | 0.025431  | -0.233521 | -0.328461 |
| H  | -1.635659 | -2.011214 | 1.727758  | C  | 0.276098  | -2.035411 | 1.238162  |
| H  | -0.577789 | -3.344307 | 2.169642  | H  | 0.033392  | -0.959397 | 1.496737  |
| C  | -0.285113 | -1.302855 | 4.034973  | H  | 1.350121  | -2.126176 | 1.461813  |
| H  | -1.320286 | -0.921381 | 4.053538  | C  | -0.005726 | -2.441661 | -0.208501 |
| H  | -0.292827 | -2.294826 | 4.517360  | H  | 0.650237  | -3.267283 | -0.499105 |
| H  | 0.331514  | -0.634416 | 4.657913  | H  | -1.046177 | -2.763509 | -0.322472 |
| C  | 0.042854  | -1.269414 | -2.340252 | C  | 0.294287  | -1.676683 | -2.131732 |
| H  | 0.967556  | -1.848075 | -2.428055 | H  | -0.450087 | -2.403354 | -2.468030 |
| H  | -0.880521 | -1.839208 | -2.476898 | H  | 1.323373  | -2.030068 | -2.232500 |
| C  | 0.049104  | 0.117040  | -2.502446 | C  | 0.057526  | -0.288919 | -2.384097 |
| H  | -0.872031 | 0.656424  | -2.740585 | H  | 0.898228  | 0.327460  | -2.715926 |
| H  | 0.979368  | 0.657037  | -2.699791 | H  | -0.923064 | 0.009941  | -2.767742 |

<sup>3</sup>TS[6A-7A]

Geometry with 57 atoms:

Total energy: -2285.549631890

|   |          |           |           |
|---|----------|-----------|-----------|
| C | 4.966477 | -2.170312 | -0.551376 |
| C | 3.614364 | -1.829838 | -0.508813 |
| C | 3.286208 | -0.485835 | -0.282002 |
| C | 4.312818 | 0.476868  | -0.096850 |
| C | 5.667511 | 0.138487  | -0.140078 |
| C | 5.976339 | -1.202793 | -0.371640 |

<sup>3</sup>7A

Geometry with 57 atoms:

|    |           |           |           |
|----|-----------|-----------|-----------|
| H  | 5.250975  | -3.210187 | -0.727662 |
| H  | 2.837414  | -2.581469 | -0.644806 |
| H  | 6.448262  | 0.888256  | 0.001563  |
| H  | 7.023905  | -1.509506 | -0.413369 |
| N  | 3.661991  | 1.681823  | 0.115240  |
| H  | 4.104016  | 2.579184  | 0.281500  |
| N  | 2.060289  | 0.155516  | -0.181134 |
| C  | 2.321781  | 1.455702  | 0.061409  |
| C  | -1.167341 | 2.347016  | 0.256696  |
| C  | -1.191997 | 3.708159  | 0.542478  |
| C  | 0.020192  | 4.410346  | 0.668329  |
| C  | 1.233981  | 3.719103  | 0.511769  |
| C  | 1.214350  | 2.356577  | 0.229838  |
| N  | 0.023018  | 1.670139  | 0.091395  |
| H  | 0.018245  | 5.478326  | 0.889034  |
| H  | -2.147162 | 4.224094  | 0.668160  |
| H  | 2.187600  | 4.242857  | 0.613912  |
| C  | -2.276619 | 1.447561  | 0.086702  |
| C  | -3.646051 | -1.766279 | -0.682991 |
| C  | -5.005819 | -2.065132 | -0.765200 |
| C  | -5.992544 | -1.086910 | -0.527503 |
| C  | -5.648449 | 0.226105  | -0.205993 |
| C  | -4.285361 | 0.521265  | -0.126567 |
| C  | -3.278052 | -0.454382 | -0.350438 |
| H  | -2.896300 | -2.530979 | -0.879992 |
| H  | -5.313649 | -3.081092 | -1.022943 |
| H  | -7.047408 | -1.360949 | -0.601056 |
| H  | -6.408051 | 0.989841  | -0.028668 |
| N  | -3.611106 | 1.698621  | 0.145971  |
| H  | -4.034606 | 2.600018  | 0.336487  |
| N  | -2.035078 | 0.150950  | -0.197874 |
| Cr | 0.025431  | -0.233521 | -0.328461 |
| C  | 0.276098  | -2.035411 | 1.238162  |
| H  | 0.033392  | -0.959397 | 1.496737  |
| H  | 1.350121  | -2.126176 | 1.461813  |
| C  | -0.005726 | -2.441661 | -0.208501 |
| H  | 0.650237  | -3.267283 | -0.499105 |
| H  | -1.046177 | -2.763509 | -0.322472 |
| C  | 0.294287  | -1.676683 | -2.131732 |
| H  | -0.450087 | -2.403354 | -2.468030 |
| H  | 1.323373  | -2.030068 | -2.232500 |
| C  | 0.057526  | -0.288919 | -2.384097 |
| H  | 0.898228  | 0.327460  | -2.715926 |
| H  | -0.923064 | 0.009941  | -2.767742 |
| C  | -0.559746 | -2.837458 | 2.253094  |
| H  | -1.629805 | -2.701198 | 2.021696  |
| H  | -0.343314 | -3.909429 | 2.108612  |
| C  | -0.279214 | -2.434440 | 3.698678  |
| H  | 0.780841  | -2.588161 | 3.960665  |
| H  | -0.515188 | -1.370501 | 3.871598  |
| H  | -0.886015 | -3.028383 | 4.400137  |

Total energy: -2285.590403320  
C -4.248165 -3.612767 -0.650133  
C -2.947144 -3.127104 -0.523922  
C -2.763330 -1.945476 0.205607  
C -3.873872 -1.276845 0.781822  
C -5.177836 -1.762815 0.659250  
C -5.344282 -2.942953 -0.066984  
H -4.425131 -4.531966 -1.213184  
H -2.101173 -3.647195 -0.977993  
H -6.026449 -1.243537 1.108476  
H -6.347929 -3.356744 -0.188060  
N -3.351121 -0.156123 1.410548  
H -3.879147 0.546889 1.916301  
N -1.617026 -1.222139 0.499113  
C -2.004760 -0.153111 1.222906  
C 1.361294 1.148181 1.486755  
C 1.244950 2.327078 2.211291  
C -0.023495 2.750296 2.652488  
C -1.151669 1.963959 2.363278  
C -1.001120 0.788264 1.636900  
N 0.245193 0.387660 1.182259  
H -0.128219 3.676734 3.217899  
H 2.135463 2.917471 2.437078  
H -2.143827 2.268648 2.703987  
C 2.544171 0.536446 0.937377  
C 4.115073 -2.052992 -0.958710  
C 5.475664 -2.127985 -1.253267  
C 6.383403 -1.149165 -0.796081  
C 5.961434 -0.060343 -0.032182  
C 4.596924 0.013962 0.259080  
C 3.676296 -0.967253 -0.189803  
H 3.412848 -2.808545 -1.317581  
H 5.849563 -2.961176 -1.852657  
H 7.441915 -1.244443 -1.048590  
H 6.663623 0.698323 0.318523  
N 3.841722 0.939408 0.964266  
H 4.192996 1.776802 1.416381  
N 2.410992 -0.616092 0.254304  
Cr 0.407060 -1.176557 0.086419  
C -0.696304 1.760713 -1.885809  
H 0.201614 2.155771 -2.395574  
H -0.471911 1.807044 -0.808125  
C 0.211042 -0.629012 -1.851921  
H 0.060007 -1.671893 -2.219875  
H 1.201199 -0.280593 -2.189292  
C -0.907906 0.299219 -2.295198  
H -1.001812 0.251896 -3.398489  
H -1.875384 -0.059853 -1.905188  
C -1.895301 2.663328 -2.179389  
H -2.790214 2.248138 -1.677400  
H -2.122872 2.643685 -3.261225  
C -1.693329 4.111624 -1.725827  
H -0.807481 4.531404 -2.236368  
H -1.449902 4.119577 -0.646877

C -2.905710 5.004670 -1.985015  
H -2.729672 6.039120 -1.647644  
H -3.152057 5.043104 -3.059676  
H -3.799974 4.630191 -1.457406

<sup>3</sup>TS[7A-13A]

Geometry with 57 atoms:

Total energy: -2285.557481440  
C -4.985475 0.528504 -0.992613  
C -3.600700 0.556294 -0.841908  
C -2.959980 -0.649617 -0.525988  
C -3.708847 -1.845112 -0.379566  
C -5.098565 -1.875442 -0.530952  
C -5.722233 -0.666612 -0.837903  
H -5.515494 1.451557 -1.238502  
H -3.027626 1.475089 -0.965437  
H -5.667458 -2.799976 -0.416477  
H -6.806896 -0.644101 -0.965357  
N -2.780276 -2.833098 -0.089252  
H -2.981511 -3.815901 0.062784  
N -1.621081 -0.941558 -0.314897  
C -1.548537 -2.261666 -0.063949  
C 2.046342 -2.253299 0.169871  
C 2.419263 -3.567768 0.440388  
C 1.419968 -4.543994 0.584618  
C 0.070984 -4.182162 0.437090  
C -0.247623 -2.854358 0.161580  
N 0.727205 -1.896929 0.051658  
H 1.690034 -5.578564 0.800616  
H 3.474176 -3.833651 0.536250  
H -0.717587 -4.931937 0.530293  
C 2.889347 -1.094695 -0.036667  
C 3.267330 2.391776 -0.713310  
C 4.482265 3.065586 -0.818209  
C 5.715521 2.395153 -0.659468  
C 5.777480 1.028235 -0.389426  
C 4.557629 0.353743 -0.282310  
C 3.314345 1.017684 -0.441526  
H 2.309523 2.899350 -0.841692  
H 4.484756 4.137146 -1.030592  
H 6.644972 2.961730 -0.751341  
H 6.731441 0.511740 -0.267719  
N 4.241826 -0.972842 -0.027531  
H 4.903761 -1.725071 0.131939  
N 2.299959 0.088601 -0.281950  
Cr 0.229676 0.010379 -0.225609  
C 0.166618 0.341740 1.912117  
H -0.650547 -0.271377 2.304982  
H 1.173345 0.075273 2.242893  
C -0.100343 1.620655 1.429602  
H -0.126076 1.560826 -0.595614  
C -1.453519 2.271700 1.541750  
H -1.518594 2.620490 2.591569  
H -2.246142 1.513018 1.435790

|   |           |          |           |
|---|-----------|----------|-----------|
| C | -1.713998 | 3.460526 | 0.618144  |
| H | -0.912917 | 4.210388 | 0.751970  |
| H | -1.637864 | 3.129768 | -0.432669 |
| H | 0.745521  | 2.307594 | 1.310935  |
| C | -3.075862 | 4.117213 | 0.855007  |
| C | -3.354193 | 5.280432 | -0.095554 |
| H | -3.135462 | 4.468696 | 1.900885  |
| H | -3.868054 | 3.353485 | 0.749633  |
| H | -3.341752 | 4.949360 | -1.148237 |
| H | -4.338446 | 5.736365 | 0.098393  |
| H | -2.594095 | 6.073296 | 0.008212  |

<sup>38</sup>A

Geometry with 63 atoms:

Total energy: -2364.140217630

|    |           |           |           |
|----|-----------|-----------|-----------|
| C  | -5.016307 | -1.676703 | -1.835155 |
| C  | -3.665757 | -1.542821 | -1.528925 |
| C  | -3.332262 | -0.817864 | -0.373974 |
| C  | -4.352702 | -0.260269 | 0.440014  |
| C  | -5.711171 | -0.392277 | 0.132689  |
| C  | -6.022619 | -1.109110 | -1.019940 |
| H  | -5.309347 | -2.234258 | -2.727628 |
| H  | -2.890110 | -1.981657 | -2.156269 |
| H  | -6.487146 | 0.042976  | 0.765133  |
| H  | -7.070413 | -1.238405 | -1.300645 |
| N  | -3.693050 | 0.362883  | 1.485520  |
| H  | -4.128532 | 0.857268  | 2.257322  |
| N  | -2.104275 | -0.514833 | 0.191454  |
| C  | -2.359641 | 0.186639  | 1.303013  |
| C  | 1.099983  | 0.579685  | 2.183256  |
| C  | 1.129890  | 1.347795  | 3.349694  |
| C  | -0.085380 | 1.758708  | 3.911331  |
| C  | -1.292186 | 1.413742  | 3.289920  |
| C  | -1.248640 | 0.637071  | 2.129179  |
| N  | -0.071787 | 0.207893  | 1.614823  |
| H  | -0.091811 | 2.359240  | 4.822453  |
| H  | 2.080767  | 1.628008  | 3.807247  |
| H  | -2.246347 | 1.748352  | 3.701211  |
| C  | 2.224105  | 0.087248  | 1.401478  |
| C  | 3.565371  | -1.657168 | -1.402900 |
| C  | 4.919821  | -1.852951 | -1.654050 |
| C  | 5.916373  | -1.350668 | -0.785219 |
| C  | 5.591911  | -0.635618 | 0.365096  |
| C  | 4.229686  | -0.440636 | 0.617130  |
| C  | 3.221049  | -0.939531 | -0.247350 |
| H  | 2.793604  | -2.041037 | -2.069575 |
| H  | 5.224318  | -2.408249 | -2.544037 |
| H  | 6.967708  | -1.529074 | -1.022432 |
| H  | 6.360671  | -0.248707 | 1.036629  |
| N  | 3.554828  | 0.202192  | 1.641531  |
| H  | 3.979095  | 0.667694  | 2.437255  |
| N  | 1.985845  | -0.588624 | 0.270173  |
| Cr | -0.052464 | -0.845564 | -0.149504 |
| C  | -0.055848 | 1.555517  | -2.044828 |

|   |           |           |           |
|---|-----------|-----------|-----------|
| H | -0.001358 | 1.488162  | -0.935417 |
| H | -1.135371 | 1.550852  | -2.281613 |
| C | 0.029522  | -1.003836 | -2.212715 |
| H | -1.009225 | -1.108479 | -2.575066 |
| H | 0.594147  | -1.852266 | -2.632723 |
| C | 0.616099  | 0.333694  | -2.690096 |
| H | 1.698717  | 0.370762  | -2.470353 |
| H | 0.537522  | 0.436161  | -3.790802 |
| C | 0.557963  | 2.897591  | -2.442904 |
| H | 1.640772  | 2.882220  | -2.217896 |
| H | 0.480854  | 3.015775  | -3.539452 |
| C | -0.102461 | -2.970299 | -0.181152 |
| H | -1.020781 | -3.267341 | -0.697221 |
| H | 0.826068  | -3.315538 | -0.644695 |
| C | -0.126045 | -2.597263 | 1.163326  |
| H | 0.786205  | -2.621286 | 1.766067  |
| H | -1.064187 | -2.571324 | 1.724644  |
| C | -0.087024 | 4.100770  | -1.750315 |
| C | 0.540105  | 5.437293  | -2.143840 |
| H | -0.014875 | 3.966699  | -0.654123 |
| H | -1.168044 | 4.115258  | -1.980712 |
| H | 0.056696  | 6.282335  | -1.626989 |
| H | 1.614780  | 5.464275  | -1.894634 |
| H | 0.450843  | 5.616104  | -3.228667 |

<sup>3</sup>TS[8A-9A]

Geometry with 63 atoms:

Total energy: -2364.128433500

|   |           |           |           |
|---|-----------|-----------|-----------|
| C | 4.979240  | -1.577392 | -1.660301 |
| C | 3.643698  | -1.214688 | -1.485477 |
| C | 3.363747  | -0.156309 | -0.610022 |
| C | 4.419969  | 0.500908  | 0.074029  |
| C | 5.758300  | 0.140822  | -0.100748 |
| C | 6.019539  | -0.909667 | -0.981834 |
| H | 5.226368  | -2.398246 | -2.337399 |
| H | 2.842736  | -1.738011 | -2.006849 |
| H | 6.562507  | 0.655633  | 0.428387  |
| H | 7.052892  | -1.222858 | -1.147171 |
| N | 3.812701  | 1.467676  | 0.859681  |
| H | 4.282592  | 2.115068  | 1.482850  |
| N | 2.164110  | 0.427225  | -0.229185 |
| C | 2.469494  | 1.395565  | 0.657587  |
| C | -0.979257 | 2.306875  | 1.192763  |
| C | -0.955519 | 3.315312  | 2.150544  |
| C | 0.278641  | 3.759897  | 2.656950  |
| C | 1.464948  | 3.166925  | 2.191463  |
| C | 1.396967  | 2.156483  | 1.238085  |
| N | 0.184922  | 1.730329  | 0.729991  |
| H | 0.314516  | 4.552726  | 3.404970  |
| H | -1.890569 | 3.756565  | 2.503004  |
| H | 2.435361  | 3.490843  | 2.573973  |
| C | -2.117513 | 1.708335  | 0.549919  |
| C | -3.591037 | -0.561346 | -1.790283 |
| C | -4.957090 | -0.685244 | -2.042763 |



|    |           |           |           |
|----|-----------|-----------|-----------|
| C  | -5.908463 | 0.100221  | -1.360858 |
| C  | -5.521233 | 1.041236  | -0.406729 |
| C  | -4.152047 | 1.162785  | -0.157552 |
| C  | -3.180481 | 0.371824  | -0.826779 |
| H  | -2.868985 | -1.170059 | -2.332698 |
| H  | -5.298438 | -1.406343 | -2.788880 |
| H  | -6.969622 | -0.027187 | -1.586692 |
| H  | -6.253169 | 1.657406  | 0.119159  |
| N  | -3.439854 | 1.986824  | 0.696311  |
| H  | -3.830806 | 2.687905  | 1.315935  |
| N  | -1.920723 | 0.728409  | -0.356793 |
| Cr | 0.122854  | 0.319007  | -0.614988 |
| C  | 0.211369  | -2.047873 | -0.182907 |
| H  | 0.005477  | -1.249753 | 0.592406  |
| H  | 1.267401  | -2.309799 | -0.017175 |
| C  | -0.014500 | -1.633368 | -1.638790 |
| H  | 0.618730  | -2.234932 | -2.297418 |
| H  | -1.061277 | -1.784356 | -1.921648 |
| C  | 0.413117  | -0.019511 | -2.895904 |
| H  | -0.354170 | -0.416080 | -3.566305 |
| H  | 1.423870  | -0.345453 | -3.152666 |
| C  | 0.267387  | 1.316572  | -2.406783 |
| H  | 1.157976  | 1.950375  | -2.359460 |
| H  | -0.672074 | 1.842362  | -2.604336 |
| C  | -0.708493 | -3.203425 | 0.250058  |
| H  | -1.759551 | -2.908018 | 0.087813  |
| H  | -0.521619 | -4.065384 | -0.413338 |
| C  | -0.505316 | -3.615716 | 1.709054  |
| H  | 0.553743  | -3.889723 | 1.868982  |
| H  | -0.695062 | -2.743827 | 2.363365  |
| C  | -1.401391 | -4.778437 | 2.143546  |
| C  | -1.198656 | -5.179923 | 3.603758  |
| H  | -1.208325 | -5.648120 | 1.489653  |
| H  | -2.458709 | -4.503417 | 1.976468  |
| H  | -1.419077 | -4.340136 | 4.284749  |
| H  | -1.854259 | -6.018893 | 3.887443  |
| H  | -0.157590 | -5.492855 | 3.792397  |

<sup>3</sup>9A

Geometry with 63 atoms:

Total energy: -2364.170928590

|   |           |          |           |
|---|-----------|----------|-----------|
| C | -3.243104 | 3.764104 | -0.369967 |
| C | -2.351614 | 2.692142 | -0.340355 |
| C | -0.983362 | 2.985739 | -0.275954 |
| C | -0.539758 | 4.332691 | -0.248421 |
| C | -1.430605 | 5.408652 | -0.277937 |
| C | -2.790372 | 5.099765 | -0.338073 |
| H | -4.316387 | 3.566540 | -0.418290 |
| H | -2.704467 | 1.660792 | -0.364205 |
| H | -1.079681 | 6.442078 | -0.255555 |
| H | -3.520936 | 5.911572 | -0.361559 |
| N | 0.844597  | 4.270008 | -0.191595 |
| H | 1.477919  | 5.061473 | -0.155661 |
| N | 0.127659  | 2.156504 | -0.229677 |

|    |           |           |           |
|----|-----------|-----------|-----------|
| C  | 1.210832  | 2.960521  | -0.182698 |
| C  | 3.537782  | 0.186015  | -0.156651 |
| C  | 4.801564  | 0.761403  | -0.132439 |
| C  | 4.924572  | 2.163384  | -0.105077 |
| C  | 3.766204  | 2.959394  | -0.112519 |
| C  | 2.514948  | 2.352699  | -0.141128 |
| N  | 2.400241  | 0.973381  | -0.155236 |
| H  | 5.910815  | 2.627941  | -0.082705 |
| H  | 5.690167  | 0.126373  | -0.136007 |
| H  | 3.843635  | 4.048374  | -0.100483 |
| C  | 3.174599  | -1.207278 | -0.192026 |
| C  | 0.692000  | -3.779062 | -0.259179 |
| C  | 0.949073  | -5.149588 | -0.267304 |
| C  | 2.267099  | -5.652879 | -0.252041 |
| C  | 3.373794  | -4.803112 | -0.226888 |
| C  | 3.113898  | -3.430427 | -0.217013 |
| C  | 1.793068  | -2.912580 | -0.234263 |
| H  | -0.328507 | -3.391774 | -0.270548 |
| H  | 0.112343  | -5.851684 | -0.285888 |
| H  | 2.425659  | -6.733600 | -0.259721 |
| H  | 4.393645  | -5.192259 | -0.214852 |
| N  | 3.949220  | -2.323584 | -0.190912 |
| H  | 4.962838  | -2.340506 | -0.166540 |
| N  | 1.866081  | -1.527871 | -0.220103 |
| Cr | 0.670560  | 0.163502  | -0.087886 |
| C  | -1.858776 | -0.867558 | 1.035933  |
| H  | -1.483347 | -1.899176 | 1.158418  |
| H  | -1.586280 | -0.576468 | -0.014052 |
| C  | 0.358672  | 0.037536  | 1.908775  |
| H  | 0.856916  | 0.866482  | 2.432867  |
| H  | 0.803571  | -0.918715 | 2.229311  |
| C  | -1.159776 | 0.054609  | 2.048895  |
| H  | -1.457948 | -0.261965 | 3.066810  |
| H  | -1.544560 | 1.081184  | 1.928294  |
| C  | -3.385001 | -0.868753 | 1.120921  |
| H  | -3.760771 | 0.165890  | 1.027315  |
| H  | -3.672930 | -1.200499 | 2.134624  |
| C  | -4.059199 | -1.759494 | 0.075898  |
| H  | -3.674101 | -2.791634 | 0.173649  |
| H  | -3.764252 | -1.422529 | -0.936454 |
| C  | -5.585904 | -1.777071 | 0.176022  |
| H  | -5.880243 | -2.112167 | 1.187894  |
| H  | -5.970116 | -0.744394 | 0.078426  |
| C  | -6.261686 | -2.669141 | -0.868677 |
| C  | -7.785631 | -2.681958 | -0.758408 |
| H  | -5.874488 | -3.699810 | -0.769190 |
| H  | -5.965861 | -2.332356 | -1.879450 |
| H  | -8.242642 | -3.332753 | -1.521449 |
| H  | -8.112304 | -3.048021 | 0.229872  |
| H  | -8.205623 | -1.670030 | -0.889493 |

<sup>3</sup>TS[9A-14A]

Geometry with 63 atoms:

Total energy: -2364.136104750

|    |           |           |           |                         |                 |           |           |
|----|-----------|-----------|-----------|-------------------------|-----------------|-----------|-----------|
| C  | 4.312119  | 1.880614  | -0.724801 | H                       | 4.469693        | -3.982920 | -0.013490 |
| C  | 3.068571  | 1.259817  | -0.632031 | H                       | 4.546817        | -2.584667 | -1.084335 |
| C  | 1.953277  | 2.075237  | -0.395085 | C                       | 6.320889        | -2.867573 | 0.119858  |
| C  | 2.103937  | 3.480167  | -0.273694 | C                       | 7.090350        | -3.682325 | -0.919015 |
| C  | 3.351321  | 4.105320  | -0.364768 | H                       | 6.578471        | -3.221529 | 1.134677  |
| C  | 4.452056  | 3.279514  | -0.589808 | H                       | 6.647309        | -1.811820 | 0.078105  |
| H  | 5.200780  | 1.272735  | -0.909726 | H                       | 8.179187        | -3.619265 | -0.760342 |
| H  | 2.956810  | 0.182256  | -0.744925 | H                       | 6.810002        | -4.748734 | -0.879637 |
| H  | 3.458149  | 5.187414  | -0.267986 | H                       | 6.882178        | -3.325728 | -1.942482 |
| H  | 5.445901  | 3.725824  | -0.669016 |                         |                 |           |           |
| N  | 0.824382  | 3.976233  | -0.076563 | <sup>31</sup> O         |                 |           |           |
| H  | 0.572472  | 4.953023  | 0.031116  | Geometry with 69 atoms: |                 |           |           |
| N  | 0.608997  | 1.763664  | -0.256099 | Total energy:           | -2442.718267000 |           |           |
| C  | -0.039945 | 2.929176  | -0.081057 | C                       | -4.427040       | -3.059015 | -1.656304 |
| C  | -3.292061 | 1.382298  | -0.004688 | C                       | -3.119290       | -2.657030 | -1.404605 |
| C  | -4.210303 | 2.419899  | 0.134875  | C                       | -2.887612       | -1.911205 | -0.238926 |
| C  | -3.737987 | 3.738552  | 0.240799  | C                       | -3.957003       | -1.589314 | 0.636141  |
| C  | -2.356393 | 3.986547  | 0.187284  | C                       | -5.272709       | -1.992862 | 0.383658  |
| C  | -1.481900 | 2.911968  | 0.041805  | C                       | -5.485924       | -2.732144 | -0.777395 |
| N  | -1.942383 | 1.623730  | -0.033609 | H                       | -4.645476       | -3.640014 | -2.555160 |
| H  | -4.440446 | 4.565606  | 0.352403  | H                       | -2.299079       | -2.900748 | -2.079511 |
| H  | -5.281427 | 2.207811  | 0.152628  | H                       | -6.090628       | -1.740564 | 1.061015  |
| H  | -1.970287 | 5.006370  | 0.250530  | H                       | -6.497554       | -3.068234 | -1.016076 |
| C  | -3.539913 | -0.036583 | -0.147158 | N                       | -3.386538       | -0.856365 | 1.663773  |
| C  | -2.330065 | -3.373477 | -0.545243 | H                       | -3.874945       | -0.470426 | 2.465019  |
| C  | -3.123674 | -4.516968 | -0.603530 | N                       | -1.722265       | -1.370518 | 0.274598  |
| C  | -4.531448 | -4.445437 | -0.510736 | C                       | -2.056216       | -0.749886 | 1.412969  |
| C  | -5.195133 | -3.228431 | -0.357381 | C                       | 1.289908        | 0.363937  | 2.095819  |
| C  | -4.397751 | -2.081649 | -0.297157 | C                       | 1.221977        | 1.140432  | 3.255039  |
| C  | -2.983668 | -2.143618 | -0.388386 | C                       | -0.018149       | 1.288056  | 3.889569  |
| H  | -1.242524 | -3.417629 | -0.624496 | C                       | -1.157103       | 0.682211  | 3.345325  |
| H  | -2.649325 | -5.493293 | -0.726510 | C                       | -1.017968       | -0.078323 | 2.181248  |
| H  | -5.115526 | -5.367209 | -0.561115 | N                       | 0.191864        | -0.252078 | 1.596185  |
| H  | -6.283103 | -3.174892 | -0.286906 | H                       | -0.099340       | 1.887469  | 4.797848  |
| N  | -4.703393 | -0.736594 | -0.147447 | H                       | 2.112713        | 1.630872  | 3.652301  |
| H  | -5.633791 | -0.341704 | -0.059985 | H                       | -2.134133       | 0.809351  | 3.814817  |
| N  | -2.483635 | -0.856086 | -0.290255 | C                       | 2.450049        | 0.106802  | 1.254214  |
| Cr | -0.661482 | 0.104947  | -0.181930 | C                       | 3.988930        | -1.344908 | -1.615858 |
| C  | -0.553408 | -0.139913 | 1.973477  | C                       | 5.344731        | -1.276718 | -1.920491 |
| H  | -0.081717 | 0.766836  | 2.365211  | C                       | 6.259090        | -0.588667 | -1.089584 |
| H  | -1.590743 | -0.313298 | 2.269081  | C                       | 5.848059        | 0.052155  | 0.076515  |
| C  | 0.240538  | -1.194179 | 1.532200  | C                       | 4.484920        | -0.018670 | 0.382786  |
| H  | 0.285326  | -1.177343 | -0.518941 | C                       | 3.556332        | -0.702042 | -0.445273 |
| C  | 1.739942  | -1.204926 | 1.675908  | H                       | 3.284130        | -1.876320 | -2.255334 |
| H  | 1.931081  | -1.513657 | 2.722843  | H                       | 5.715332        | -1.767112 | -2.823446 |
| H  | 2.125797  | -0.175428 | 1.598542  | H                       | 7.314889        | -0.561654 | -1.368602 |
| C  | 2.507065  | -2.139401 | 0.741229  | H                       | 6.554289        | 0.579074  | 0.720827  |
| H  | 2.138048  | -3.173257 | 0.868019  | N                       | 3.742352        | 0.477217  | 1.440932  |
| H  | 2.274355  | -1.869393 | -0.303314 | H                       | 4.102137        | 1.012682  | 2.224230  |
| H  | -0.233250 | -2.174776 | 1.408406  | N                       | 2.299995        | -0.599295 | 0.126838  |
| C  | 4.021395  | -2.098913 | 0.956339  | Cr                      | 0.316159        | -1.240030 | -0.201517 |
| C  | 4.802385  | -2.929476 | -0.064330 | C                       | -0.202236       | 1.212567  | -1.895605 |
| H  | 4.261878  | -2.445209 | 1.978147  | H                       | 0.823155        | 1.467431  | -2.219191 |
| H  | 4.364496  | -1.048921 | 0.908178  | H                       | -0.113258       | 1.027300  | -0.801754 |

|   |           |           |           |
|---|-----------|-----------|-----------|
| C | 0.182457  | -1.290309 | -2.268537 |
| H | -0.226011 | -2.201939 | -2.734547 |
| H | 1.207949  | -1.164446 | -2.662505 |
| C | -0.668947 | -0.059657 | -2.620709 |
| H | -0.667244 | 0.138770  | -3.710793 |
| H | -1.726355 | -0.245958 | -2.359618 |
| C | -1.119770 | 2.423710  | -2.056622 |
| H | -2.147260 | 2.139208  | -1.762959 |
| H | -1.176280 | 2.696435  | -3.126108 |
| C | -0.673230 | 3.633938  | -1.232958 |
| H | 0.349120  | 3.926577  | -1.536439 |
| H | -0.595246 | 3.334853  | -0.169373 |
| C | -1.601435 | 4.844860  | -1.343850 |
| H | -1.667442 | 5.160115  | -2.401538 |
| H | -2.627059 | 4.546038  | -1.055997 |
| C | -1.163507 | 6.035717  | -0.486602 |
| C | -2.099665 | 7.238703  | -0.592905 |
| H | -0.140327 | 6.335739  | -0.778463 |
| H | -1.092795 | 5.714407  | 0.569493  |
| H | -1.758911 | 8.076451  | 0.037203  |
| H | -2.161279 | 7.607344  | -1.630882 |
| H | -3.124129 | 6.978535  | -0.275727 |
| C | 0.718019  | -3.015100 | 1.015731  |
| H | 1.648505  | -2.852230 | 1.566536  |
| H | -0.162869 | -3.231543 | 1.626518  |
| C | 0.733242  | -3.317550 | -0.347069 |
| H | -0.128806 | -3.798831 | -0.817644 |
| H | 1.679065  | -3.418772 | -0.888333 |

<sup>3</sup>TS[10A-11A]

Geometry with 69 atoms:

Total energy: -2442.707172370

|   |           |           |           |
|---|-----------|-----------|-----------|
| C | -4.502273 | 2.701386  | -2.047045 |
| C | -3.431456 | 1.841915  | -1.800933 |
| C | -3.412819 | 1.153793  | -0.579584 |
| C | -4.456366 | 1.349098  | 0.363028  |
| C | -5.530230 | 2.208332  | 0.118370  |
| C | -5.535544 | 2.880765  | -1.104563 |
| H | -4.541732 | 3.249493  | -2.991171 |
| H | -2.634200 | 1.711299  | -2.531719 |
| H | -6.327662 | 2.347795  | 0.850893  |
| H | -6.357669 | 3.561895  | -1.335603 |
| N | -4.135007 | 0.550228  | 1.448655  |
| H | -4.671834 | 0.460215  | 2.304238  |
| N | -2.503598 | 0.251590  | -0.046341 |
| C | -2.965016 | -0.087270 | 1.174237  |
| C | -0.161000 | -2.243231 | 1.882636  |
| C | -0.384892 | -2.738432 | 3.163181  |
| C | -1.544558 | -2.355902 | 3.860984  |
| C | -2.453150 | -1.474860 | 3.250621  |
| C | -2.193146 | -1.003809 | 1.967589  |
| N | -1.057843 | -1.386256 | 1.279047  |
| H | -1.733818 | -2.735908 | 4.865442  |
| H | 0.336773  | -3.418588 | 3.621307  |

|    |           |           |           |
|----|-----------|-----------|-----------|
| H  | -3.356094 | -1.154507 | 3.775192  |
| C  | 0.950066  | -2.496712 | 1.004507  |
| C  | 2.654424  | -2.124262 | -2.119241 |
| C  | 3.856089  | -2.744076 | -2.461183 |
| C  | 4.530851  | -3.594180 | -1.561569 |
| C  | 4.020450  | -3.854881 | -0.289867 |
| C  | 2.816227  | -3.232770 | 0.047995  |
| C  | 2.127392  | -2.366794 | -0.842155 |
| H  | 2.142221  | -1.476958 | -2.829859 |
| H  | 4.283447  | -2.569502 | -3.451225 |
| H  | 5.469551  | -4.061539 | -1.867544 |
| H  | 4.534740  | -4.517619 | 0.408775  |
| N  | 2.043232  | -3.282496 | 1.194607  |
| H  | 2.241059  | -3.829616 | 2.025199  |
| N  | 0.971718  | -1.915722 | -0.213204 |
| Cr | -0.734173 | -0.732766 | -0.527972 |
| C  | 0.213975  | 1.380899  | -1.165574 |
| H  | 0.155881  | 0.947792  | -0.119635 |
| H  | -0.529397 | 2.191792  | -1.130452 |
| C  | -0.104049 | 0.416776  | -2.310766 |
| H  | -0.585446 | 0.954365  | -3.132315 |
| H  | 0.813091  | -0.048155 | -2.685853 |
| C  | -1.416589 | -1.147223 | -2.714352 |
| H  | -0.752294 | -1.410494 | -3.541979 |
| H  | -2.257240 | -0.517676 | -3.016723 |
| C  | -1.674490 | -2.129993 | -1.706929 |
| H  | -2.698492 | -2.235757 | -1.336850 |
| H  | -1.082701 | -3.050526 | -1.716963 |
| C  | 1.643590  | 1.942872  | -1.237861 |
| H  | 2.356525  | 1.101198  | -1.280321 |
| H  | 1.756299  | 2.492481  | -2.188239 |
| C  | 1.994588  | 2.856061  | -0.062263 |
| H  | 1.271015  | 3.690303  | -0.015086 |
| H  | 1.871874  | 2.294033  | 0.882851  |
| C  | 3.416229  | 3.417531  | -0.135926 |
| C  | 3.783692  | 4.315473  | 1.047325  |
| H  | 3.535144  | 3.985184  | -1.077211 |
| H  | 4.135357  | 2.579632  | -0.197023 |
| H  | 3.664555  | 3.746356  | 1.988548  |
| H  | 3.062825  | 5.152147  | 1.109332  |
| C  | 5.205475  | 4.878973  | 0.974967  |
| C  | 5.564725  | 5.770476  | 2.162826  |
| H  | 5.321314  | 5.449369  | 0.035258  |
| H  | 5.924281  | 4.041649  | 0.909198  |
| H  | 6.591902  | 6.161589  | 2.081321  |
| H  | 4.884132  | 6.636122  | 2.234326  |
| H  | 5.494046  | 5.217371  | 3.115151  |

<sup>3</sup>11A

Geometry with 69 atoms:

Total energy: -2442.722045800

|   |          |           |           |
|---|----------|-----------|-----------|
| C | 2.826795 | -4.870797 | -1.594768 |
| C | 2.402884 | -3.551459 | -1.478197 |
| C | 2.991815 | -2.769648 | -0.470846 |

|    |           |           |           |
|----|-----------|-----------|-----------|
| C  | 3.983130  | -3.327809 | 0.378209  |
| C  | 4.410862  | -4.655126 | 0.262550  |
| C  | 3.813073  | -5.414997 | -0.738769 |
| H  | 2.388480  | -5.506044 | -2.367743 |
| H  | 1.645852  | -3.132605 | -2.139500 |
| H  | 5.173218  | -5.072462 | 0.922835  |
| H  | 4.113415  | -6.457260 | -0.868663 |
| N  | 4.350256  | -2.306711 | 1.235731  |
| H  | 5.040171  | -2.369389 | 1.977383  |
| N  | 2.789529  | -1.448251 | -0.106026 |
| C  | 3.618967  | -1.209801 | 0.916661  |
| C  | 2.630953  | 2.216431  | 1.363963  |
| C  | 3.413689  | 2.731309  | 2.401950  |
| C  | 4.344210  | 1.880611  | 3.011172  |
| C  | 4.474313  | 0.553847  | 2.582370  |
| C  | 3.656807  | 0.113797  | 1.535421  |
| N  | 2.768429  | 0.941771  | 0.953368  |
| H  | 4.970834  | 2.252950  | 3.823809  |
| H  | 3.303835  | 3.768158  | 2.725372  |
| H  | 5.197873  | -0.115264 | 3.051755  |
| C  | 1.606344  | 2.908264  | 0.586929  |
| C  | -0.848775 | 3.067498  | -1.988434 |
| C  | -1.613179 | 4.186637  | -2.299384 |
| C  | -1.473103 | 5.403404  | -1.591347 |
| C  | -0.562467 | 5.540189  | -0.547489 |
| C  | 0.204484  | 4.412348  | -0.235454 |
| C  | 0.073992  | 3.185081  | -0.936865 |
| H  | -0.953446 | 2.130023  | -2.532100 |
| H  | -2.340424 | 4.128068  | -3.112368 |
| H  | -2.094379 | 6.256936  | -1.872289 |
| H  | -0.451929 | 6.478759  | -0.001358 |
| N  | 1.182549  | 4.189401  | 0.716951  |
| H  | 1.524791  | 4.864938  | 1.392540  |
| N  | 0.964077  | 2.269356  | -0.398039 |
| Cr | 1.562290  | 0.231942  | -0.617701 |
| C  | -1.793179 | -0.624098 | -1.328588 |
| H  | -2.132868 | 0.221358  | -1.954014 |
| H  | -1.425663 | -0.162430 | -0.389554 |
| C  | 0.582818  | -0.450879 | -2.314943 |
| H  | 1.331520  | -1.013211 | -2.909187 |
| H  | 0.282732  | 0.396935  | -2.962125 |
| C  | -0.638615 | -1.343774 | -2.035120 |
| H  | -1.035636 | -1.785712 | -2.972152 |
| H  | -0.342604 | -2.213290 | -1.415921 |
| C  | -2.989763 | -1.520359 | -1.004569 |
| H  | -2.655030 | -2.361621 | -0.368883 |
| H  | -3.362069 | -1.981338 | -1.938059 |
| C  | -4.138706 | -0.785844 | -0.309516 |
| H  | -4.476134 | 0.050640  | -0.949649 |
| H  | -3.762822 | -0.317347 | 0.619860  |
| C  | -5.334703 | -1.680209 | 0.024479  |
| H  | -5.708735 | -2.150191 | -0.903996 |
| H  | -4.997739 | -2.514864 | 0.667323  |
| C  | -6.483914 | -0.942127 | 0.715319  |

|   |            |           |          |
|---|------------|-----------|----------|
| C | -7.678230  | -1.836848 | 1.054484 |
| H | -6.822969  | -0.110407 | 0.069800 |
| H | -6.108433  | -0.468089 | 1.641736 |
| H | -8.052787  | -2.312534 | 0.128743 |
| H | -7.340013  | -2.667754 | 1.701860 |
| C | -8.829557  | -1.098271 | 1.742535 |
| C | -10.015380 | -2.001528 | 2.079262 |
| H | -9.168304  | -0.270133 | 1.093141 |
| H | -8.453562  | -0.621090 | 2.666361 |
| H | -10.827554 | -1.441034 | 2.570602 |
| H | -10.434885 | -2.466811 | 1.170862 |
| H | -9.716959  | -2.818484 | 2.758413 |

<sup>51</sup>A

Geometry with 39 atoms:

Total energy: -2049.873007040

|    |           |           |           |
|----|-----------|-----------|-----------|
| C  | -4.984015 | -2.661322 | -0.018189 |
| C  | -3.631550 | -2.343076 | 0.006948  |
| C  | -3.294955 | -0.979920 | 0.006746  |
| C  | -4.304678 | 0.017076  | -0.017442 |
| C  | -5.667229 | -0.303501 | -0.041520 |
| C  | -5.984268 | -1.658734 | -0.041580 |
| H  | -5.288352 | -3.710387 | -0.020848 |
| H  | -2.849325 | -3.103997 | 0.024026  |
| H  | -6.440614 | 0.466544  | -0.060031 |
| H  | -7.034494 | -1.958846 | -0.061150 |
| N  | -3.627349 | 1.224275  | -0.016301 |
| H  | -4.051385 | 2.146590  | -0.032845 |
| N  | -2.062016 | -0.358423 | 0.021647  |
| C  | -2.297589 | 0.955696  | 0.004361  |
| C  | 1.173439  | 1.897401  | -0.000142 |
| C  | 1.216197  | 3.297142  | 0.003563  |
| C  | -0.000001 | 3.989910  | 0.005224  |
| C  | -1.216199 | 3.297142  | 0.003577  |
| C  | -1.173440 | 1.897400  | -0.000132 |
| N  | -0.000000 | 1.246567  | -0.004768 |
| H  | -0.000002 | 5.081914  | 0.011131  |
| H  | 2.166105  | 3.834273  | 0.009858  |
| H  | -2.166108 | 3.834271  | 0.009887  |
| C  | 2.297589  | 0.955697  | 0.004338  |
| C  | 3.631551  | -2.343075 | 0.006997  |
| C  | 4.984017  | -2.661322 | -0.018128 |
| C  | 5.984270  | -1.658733 | -0.041554 |
| C  | 5.667229  | -0.303500 | -0.041540 |
| C  | 4.304678  | 0.017077  | -0.017470 |
| C  | 3.294956  | -0.979920 | 0.006748  |
| H  | 2.849328  | -3.103996 | 0.024100  |
| H  | 5.288355  | -3.710386 | -0.020754 |
| H  | 7.034495  | -1.958845 | -0.061116 |
| H  | 6.440614  | 0.466544  | -0.060077 |
| N  | 3.627348  | 1.224275  | -0.016369 |
| H  | 4.051384  | 2.146590  | -0.032947 |
| N  | 2.062017  | -0.358422 | 0.021619  |
| Cr | -0.000001 | -0.886958 | 0.053651  |

H 0.000002 -2.579806 0.077517

<sup>52</sup>A

Geometry with 45 atoms:

Total energy: -2128.417754180

C -4.992673 -2.540284 -0.445379  
C -3.639524 -2.224215 -0.419663  
C -3.301091 -0.866299 -0.305332  
C -4.309568 0.129161 -0.225122  
C -5.672561 -0.189013 -0.253025  
C -5.991543 -1.539592 -0.363092  
H -5.298370 -3.585230 -0.534266  
H -2.857492 -2.982476 -0.488750  
H -6.445337 0.579502 -0.192317  
H -7.042446 -1.836923 -0.388866  
N -3.630420 1.331047 -0.123943  
H -4.052327 2.251823 -0.057063  
N -2.066982 -0.250518 -0.251240  
C -2.299657 1.059409 -0.143883  
C 1.173075 1.993114 -0.059077  
C 1.215184 3.389849 0.032128  
C -0.000099 4.082102 0.082775  
C -1.215375 3.389807 0.032436  
C -1.173240 1.993076 -0.058749  
N -0.000073 1.340098 -0.085912  
H -0.000107 5.171501 0.156440  
H 2.166517 3.923890 0.059978  
H -2.166722 3.923812 0.060519  
C 2.299506 1.059486 -0.144452  
C 3.639437 -2.224111 -0.420067  
C 4.992590 -2.540198 -0.445334  
C 5.991445 -1.539510 -0.362799  
C 5.672447 -0.188920 -0.252903  
C 4.309449 0.129275 -0.225433  
C 3.300988 -0.866182 -0.305918  
H 2.857417 -2.982371 -0.489282  
H 5.298303 -3.585157 -0.534008  
H 7.042352 -1.836861 -0.388183  
H 6.445216 0.579583 -0.191960  
N 3.630271 1.331148 -0.124295  
H 4.052163 2.251909 -0.057135  
N 2.066877 -0.250424 -0.251995  
Cr -0.000108 -0.791488 -0.249505  
H -0.000105 -2.429601 -0.669835  
C 0.000864 -1.883231 2.361973  
H 0.931103 -2.436352 2.198358  
H -0.929345 -2.435840 2.196510  
C 0.000781 -0.613260 2.787744  
H -0.931528 -0.073658 2.983518  
H 0.932977 -0.074063 2.985200

<sup>5</sup>TS[2A-3A]

Geometry with 45 atoms:

Total energy: -2128.403044410

C 4.973282 -2.483225 -0.469974  
C 3.621863 -2.152772 -0.460080  
C 3.289806 -0.800222 -0.291079  
C 4.304650 0.180814 -0.147056  
C 5.664264 -0.149992 -0.159067  
C 5.977023 -1.497865 -0.320796  
H 5.270463 -3.526369 -0.599563  
H 2.839918 -2.904407 -0.583258  
H 6.441280 0.608531 -0.047362  
H 7.026042 -1.802345 -0.335899  
N 3.637006 1.385640 -0.008617  
H 4.066659 2.295475 0.121907  
N 2.058092 -0.173760 -0.237243  
C 2.301717 1.131737 -0.064531  
C -1.180223 2.055433 0.029005  
C -1.214438 3.451230 0.072543  
C 0.000077 4.149410 0.104576  
C 1.214569 3.451186 0.072592  
C 1.180310 2.055389 0.029047  
N 0.000034 1.385934 0.036013  
H 0.000096 5.240459 0.136602  
H -2.165906 3.986360 0.069282  
H 2.166053 3.986286 0.069368  
C -2.301658 1.131819 -0.064606  
C -3.621793 -2.152685 -0.460239  
C -4.973207 -2.483157 -0.470079  
C -5.976951 -1.497816 -0.320796  
C -5.664201 -0.149946 -0.159009  
C -4.304591 0.180879 -0.147045  
C -3.289749 -0.800140 -0.291177  
H -2.839841 -2.904301 -0.583495  
H -5.270380 -3.526298 -0.599710  
H -7.025967 -1.802309 -0.335863  
H -6.441226 0.608557 -0.047226  
N -3.636947 1.385708 -0.008591  
H -4.066599 2.295537 0.121970  
N -2.058039 -0.173665 -0.237396  
Cr -0.000016 -0.659533 -0.041442  
C -0.000290 -1.436695 2.093665  
H 0.933709 -1.028646 2.491590  
H -0.934273 -1.028434 2.491409  
C -0.000385 -2.621166 1.373271  
H -0.000187 -2.316558 -0.378073  
H -0.921913 -3.197395 1.249293  
H 0.920994 -3.197672 1.249476

<sup>53</sup>A

Geometry with 45 atoms:

Total energy: -2128.449949220

C -5.044905 -2.352579 -0.068189  
C -3.687069 -2.055920 -0.085000  
C -3.324235 -0.699245 -0.052018  
C -4.320111 0.310882 0.001258  
C -5.687868 0.013169 0.017306

|    |           |           |           |    |           |           |           |
|----|-----------|-----------|-----------|----|-----------|-----------|-----------|
| C  | -6.028769 | -1.335666 | -0.019606 | N  | -3.675769 | 1.512665  | -0.158077 |
| H  | -5.365121 | -3.396571 | -0.093224 | H  | -4.090462 | 2.439040  | -0.171735 |
| H  | -2.924921 | -2.834693 | -0.120632 | N  | -2.119454 | -0.084595 | -0.118076 |
| H  | -6.447449 | 0.796072  | 0.057139  | C  | -2.347133 | 1.231004  | -0.150735 |
| H  | -7.083900 | -1.618494 | -0.009149 | C  | 1.115042  | 2.207573  | -0.147695 |
| N  | -3.625918 | 1.506882  | 0.032892  | C  | 1.140379  | 3.605257  | -0.228778 |
| H  | -4.037464 | 2.434166  | 0.069883  | C  | -0.082878 | 4.283400  | -0.275430 |
| N  | -2.080370 | -0.095802 | -0.055854 | C  | -1.288148 | 3.572928  | -0.251880 |
| C  | -2.299691 | 1.220782  | -0.001459 | C  | -1.228145 | 2.176058  | -0.168180 |
| C  | 1.172758  | 2.159291  | 0.025503  | N  | -0.048580 | 1.537927  | -0.105513 |
| C  | 1.216244  | 3.558470  | 0.077896  | H  | -0.096975 | 5.373137  | -0.341692 |
| C  | 0.000192  | 4.251105  | 0.103721  | H  | 2.084965  | 4.151456  | -0.263158 |
| C  | -1.215889 | 3.558514  | 0.078140  | H  | -2.245073 | 4.094792  | -0.305642 |
| C  | -1.172459 | 2.159335  | 0.025695  | C  | 2.257831  | 1.291798  | -0.119041 |
| N  | 0.000136  | 1.509940  | 0.001693  | C  | 3.700209  | -1.960417 | -0.087796 |
| H  | 0.000217  | 5.342239  | 0.146111  | C  | 5.062779  | -2.234347 | -0.055398 |
| H  | 2.165719  | 4.096052  | 0.100283  | C  | 6.029246  | -1.200321 | -0.030706 |
| H  | -2.165341 | 4.096127  | 0.100758  | C  | 5.665738  | 0.143317  | -0.039574 |
| C  | 2.299935  | 1.220667  | -0.001717 | C  | 4.293495  | 0.418052  | -0.071858 |
| C  | 3.687055  | -2.056163 | -0.084773 | C  | 3.314435  | -0.609714 | -0.092351 |
| C  | 5.044867  | -2.352926 | -0.067846 | H  | 2.951163  | -2.751881 | -0.113475 |
| C  | 6.028810  | -1.336086 | -0.019375 | H  | 5.400069  | -3.273235 | -0.051031 |
| C  | 5.688009  | 0.012779  | 0.017321  | H  | 7.088897  | -1.464820 | -0.005697 |
| C  | 4.320276  | 0.310596  | 0.001165  | H  | 6.412354  | 0.939464  | -0.022727 |
| C  | 3.324315  | -0.699456 | -0.052033 | N  | 3.579678  | 1.602693  | -0.090877 |
| H  | 2.924862  | -2.834897 | -0.120312 | H  | 3.974642  | 2.537594  | -0.083658 |
| H  | 5.365000  | -3.396948 | -0.092693 | N  | 2.060099  | -0.028391 | -0.120166 |
| H  | 7.083918  | -1.618995 | -0.008820 | Cr | -0.016649 | -0.603345 | -0.093322 |
| H  | 6.447649  | 0.795628  | 0.057087  | C  | 0.083684  | -2.627994 | -0.632754 |
| N  | 3.626185  | 1.506659  | 0.032644  | H  | -0.892078 | -3.124748 | -0.466962 |
| H  | 4.037806  | 2.433911  | 0.069577  | H  | 0.788469  | -3.150537 | 0.045381  |
| N  | 2.080502  | -0.095901 | -0.056017 | C  | 0.516227  | -2.828074 | -2.091235 |
| Cr | 0.000033  | -0.635418 | -0.133104 | H  | 1.500086  | -2.368625 | -2.300199 |
| C  | -0.000256 | -2.704831 | -0.438678 | H  | 0.603058  | -3.892801 | -2.387079 |
| H  | -0.879347 | -2.969505 | -1.060350 | C  | 0.204268  | -1.611585 | 2.700256  |
| H  | 0.879353  | -2.970218 | -1.059293 | H  | -0.587366 | -2.357030 | 2.573373  |
| C  | -0.001324 | -3.538808 | 0.849580  | H  | 1.233875  | -1.973322 | 2.616744  |
| H  | -0.001724 | -4.632741 | 0.671170  | C  | -0.072565 | -0.331530 | 2.973936  |
| H  | -0.886230 | -3.328115 | 1.478628  | H  | 0.720351  | 0.408766  | 3.123583  |
| H  | 0.883143  | -3.328902 | 1.479509  | H  | -1.103036 | 0.022476  | 3.082181  |
|    |           |           |           | H  | -0.200976 | -2.370217 | -2.797680 |

<sup>54</sup>A

Geometry with 51 atoms:  
 Total energy: -2206.994682820  
 C -5.078539 -2.351419 -0.038145  
 C -3.721761 -2.049423 -0.053014  
 C -3.361884 -0.692356 -0.096916  
 C -4.363551 0.313747 -0.122350  
 C -5.730182 0.011450 -0.107918  
 C -6.066672 -1.338360 -0.065955  
 H -5.393938 -3.396672 -0.005038  
 H -2.957953 -2.826832 -0.033665  
 H -6.492641 0.792359 -0.128127  
 H -7.120910 -1.624444 -0.053912

<sup>5</sup>TS[4A-5A]  
 Geometry with 51 atoms:  
 Total energy: -2206.968956550  
 C 4.986472 -2.302749 -0.266808  
 C 3.634684 -1.964924 -0.255377  
 C 3.302880 -0.607191 -0.137660  
 C 4.327786 0.370071 -0.040260  
 C 5.684520 0.033832 -0.052607  
 C 5.995115 -1.320588 -0.166209  
 H 5.274220 -3.352616 -0.357473  
 H 2.862713 -2.728912 -0.339001  
 H 6.463351 0.795049 0.022836

|    |           |           |           |
|----|-----------|-----------|-----------|
| H  | 7.043025  | -1.628629 | -0.179310 |
| N  | 3.674493  | 1.586888  | 0.060120  |
| H  | 4.114847  | 2.497127  | 0.140906  |
| N  | 2.075024  | 0.037279  | -0.093692 |
| C  | 2.336547  | 1.350632  | 0.025710  |
| C  | -1.143850 | 2.294807  | 0.082259  |
| C  | -1.161474 | 3.685487  | 0.161233  |
| C  | 0.057218  | 4.381194  | 0.209172  |
| C  | 1.266961  | 3.667440  | 0.170782  |
| C  | 1.229464  | 2.278135  | 0.092657  |
| N  | 0.037544  | 1.599922  | 0.058930  |
| H  | 0.065047  | 5.470290  | 0.270986  |
| H  | -2.110894 | 4.224787  | 0.183550  |
| H  | 2.223533  | 4.193051  | 0.199588  |
| C  | -2.264745 | 1.386631  | 0.005054  |
| C  | -3.653282 | -1.892226 | -0.288841 |
| C  | -5.014108 | -2.190805 | -0.319805 |
| C  | -5.995336 | -1.180380 | -0.234908 |
| C  | -5.645368 | 0.163854  | -0.118693 |
| C  | -4.279630 | 0.459269  | -0.087451 |
| C  | -3.279971 | -0.545636 | -0.166947 |
| H  | -2.907206 | -2.681283 | -0.360977 |
| H  | -5.329786 | -3.232241 | -0.414143 |
| H  | -7.051652 | -1.457134 | -0.263247 |
| H  | -6.401288 | 0.948998  | -0.056077 |
| N  | -3.596253 | 1.657618  | 0.018422  |
| H  | -4.013609 | 2.579423  | 0.089621  |
| N  | -2.033284 | 0.064909  | -0.105478 |
| Cr | 0.023891  | -0.384476 | -0.127580 |
| C  | -0.694843 | -3.002127 | 2.110299  |
| H  | -0.452492 | -4.016375 | 1.752855  |
| H  | -1.767735 | -2.823986 | 1.932156  |
| C  | 0.169831  | -1.942582 | 1.461372  |
| H  | -0.067764 | -0.955463 | 1.916439  |
| H  | 1.244487  | -2.122638 | 1.603884  |
| C  | -0.003415 | -2.691962 | -0.594243 |
| H  | -0.961803 | -3.161714 | -0.369486 |
| H  | 0.853035  | -3.318656 | -0.335061 |
| C  | 0.075425  | -1.818159 | -1.697283 |
| H  | 1.029533  | -1.684343 | -2.217062 |
| H  | -0.827741 | -1.608617 | -2.280367 |
| H  | -0.543155 | -3.007124 | 3.204505  |

<sup>55</sup>A

Geometry with 51 atoms:  
 Total energy: -2207.029800490

|   |          |           |           |
|---|----------|-----------|-----------|
| C | 5.082185 | -2.052194 | -0.723750 |
| C | 3.725205 | -1.754766 | -0.675725 |
| C | 3.364852 | -0.434339 | -0.358623 |
| C | 4.365140 | 0.540073  | -0.102553 |
| C | 5.731881 | 0.242081  | -0.152300 |
| C | 6.069446 | -1.070887 | -0.466873 |
| H | 5.398121 | -3.069473 | -0.965685 |
| H | 2.963241 | -2.507551 | -0.874162 |

|    |           |           |           |
|----|-----------|-----------|-----------|
| H  | 6.492910  | 0.999118  | 0.045195  |
| H  | 7.123764  | -1.352528 | -0.517170 |
| N  | 3.676479  | 1.707904  | 0.171175  |
| H  | 4.090330  | 2.606901  | 0.395980  |
| N  | 2.122292  | 0.161497  | -0.234099 |
| C  | 2.349480  | 1.438901  | 0.081631  |
| C  | -1.110550 | 2.402089  | 0.257849  |
| C  | -1.135434 | 3.772176  | 0.549211  |
| C  | 0.089146  | 4.431049  | 0.706738  |
| C  | 1.294777  | 3.732829  | 0.573949  |
| C  | 1.231487  | 2.364744  | 0.282044  |
| N  | 0.051651  | 1.745260  | 0.136808  |
| H  | 0.104076  | 5.499687  | 0.930721  |
| H  | -2.078426 | 4.313882  | 0.646911  |
| H  | 2.253120  | 4.243019  | 0.688702  |
| C  | -2.253132 | 1.511036  | 0.036500  |
| C  | -3.723241 | -1.642649 | -0.712861 |
| C  | -5.088480 | -1.895189 | -0.779453 |
| C  | -6.046248 | -0.878387 | -0.550502 |
| C  | -5.669052 | 0.425710  | -0.244760 |
| C  | -4.293960 | 0.677652  | -0.175691 |
| C  | -3.322373 | -0.331592 | -0.405950 |
| H  | -2.983862 | -2.423695 | -0.886549 |
| H  | -5.434552 | -2.904430 | -1.013683 |
| H  | -7.108579 | -1.124899 | -0.614758 |
| H  | -6.406420 | 1.210709  | -0.067395 |
| N  | -3.571862 | 1.824140  | 0.100069  |
| H  | -3.959361 | 2.738553  | 0.308898  |
| N  | -2.062545 | 0.224367  | -0.267359 |
| Cr | 0.024142  | -0.332186 | -0.407449 |
| C  | -0.733161 | -3.210246 | 1.397031  |
| H  | -1.712370 | -3.500968 | 0.975079  |
| H  | -0.856975 | -2.158237 | 1.723150  |
| C  | 0.052249  | -2.365433 | -0.909789 |
| H  | 0.831385  | -2.514826 | -1.684720 |
| H  | -0.896173 | -2.671241 | -1.394634 |
| C  | 0.332333  | -3.281162 | 0.294464  |
| H  | 0.431214  | -4.342944 | -0.013633 |
| H  | 1.311030  | -3.024076 | 0.746114  |
| C  | -0.420830 | -4.080316 | 2.613694  |
| H  | 0.532524  | -3.782892 | 3.083807  |
| H  | -1.207920 | -4.007811 | 3.382524  |
| H  | -0.328930 | -5.143100 | 2.332232  |

<sup>5</sup>TS[5A-12A]

Geometry with 51 atoms:  
 Total energy: -2206.987955450

|   |          |           |           |
|---|----------|-----------|-----------|
| C | 5.027684 | -1.887211 | -0.794144 |
| C | 3.660475 | -1.641424 | -0.708061 |
| C | 3.254915 | -0.329364 | -0.420929 |
| C | 4.218827 | 0.696806  | -0.241422 |
| C | 5.593592 | 0.451824  | -0.327896 |
| C | 5.978541 | -0.858065 | -0.604854 |
| H | 5.377639 | -2.897649 | -1.017291 |

|    |           |           |           |
|----|-----------|-----------|-----------|
| H  | 2.923855  | -2.429613 | -0.863749 |
| H  | 6.327781  | 1.247419  | -0.187522 |
| H  | 7.042078  | -1.095461 | -0.682338 |
| N  | 3.491873  | 1.848534  | 0.000769  |
| H  | 3.874218  | 2.771767  | 0.175506  |
| N  | 1.990482  | 0.218046  | -0.282070 |
| C  | 2.171121  | 1.523268  | -0.031816 |
| C  | -1.344883 | 2.298193  | 0.119768  |
| C  | -1.433258 | 3.684448  | 0.257421  |
| C  | -0.246940 | 4.426385  | 0.340747  |
| C  | 0.993477  | 3.779515  | 0.263281  |
| C  | 1.014206  | 2.389316  | 0.129801  |
| N  | -0.138609 | 1.675313  | 0.092502  |
| H  | -0.289987 | 5.511819  | 0.446490  |
| H  | -2.404378 | 4.181109  | 0.289129  |
| H  | 1.923105  | 4.351020  | 0.291469  |
| C  | -2.427026 | 1.341089  | -0.047434 |
| C  | -3.604229 | -1.964311 | -0.659581 |
| C  | -4.940701 | -2.346682 | -0.723199 |
| C  | -5.986563 | -1.412109 | -0.541995 |
| C  | -5.732210 | -0.064777 | -0.293700 |
| C  | -4.387793 | 0.318089  | -0.228314 |
| C  | -3.330931 | -0.612452 | -0.403529 |
| H  | -2.789979 | -2.675613 | -0.808843 |
| H  | -5.191839 | -3.391180 | -0.921443 |
| H  | -7.021811 | -1.755904 | -0.601379 |
| H  | -6.541713 | 0.654851  | -0.158155 |
| N  | -3.772930 | 1.539014  | -0.008213 |
| H  | -4.241785 | 2.422968  | 0.158420  |
| N  | -2.126540 | 0.057744  | -0.286651 |
| Cr | -0.056860 | -0.360923 | -0.067376 |
| C  | -0.144265 | -1.168253 | 2.015784  |
| H  | 0.779305  | -0.813674 | 2.486940  |
| H  | -1.083048 | -0.741861 | 2.380293  |
| C  | -0.145439 | -2.378648 | 1.324196  |
| H  | -0.071301 | -2.005304 | -0.426571 |
| C  | 1.033996  | -3.323714 | 1.332146  |
| H  | 0.990439  | -3.838889 | 2.310235  |
| H  | 1.970718  | -2.742861 | 1.342865  |
| C  | 1.050862  | -4.368119 | 0.220173  |
| H  | 0.130757  | -4.976041 | 0.230439  |
| H  | 1.121846  | -3.900096 | -0.774797 |
| H  | 1.904044  | -5.054379 | 0.337972  |
| H  | -1.115990 | -2.853662 | 1.136349  |

<sup>56</sup>A

Geometry with 57 atoms:

Total energy: -2285.575063440

|   |          |           |           |
|---|----------|-----------|-----------|
| C | 5.086816 | -2.015060 | -0.778805 |
| C | 3.725868 | -1.739129 | -0.713810 |
| C | 3.345931 | -0.444805 | -0.321980 |
| C | 4.333129 | 0.527439  | -0.010975 |
| C | 5.703617 | 0.250666  | -0.073673 |
| C | 6.060096 | -1.037197 | -0.462916 |

|    |           |           |           |
|----|-----------|-----------|-----------|
| H  | 5.417064  | -3.011720 | -1.080265 |
| H  | 2.973324  | -2.490073 | -0.953551 |
| H  | 6.453724  | 1.005719  | 0.168430  |
| H  | 7.118340  | -1.300694 | -0.527247 |
| N  | 3.629294  | 1.671218  | 0.318467  |
| H  | 4.032545  | 2.562722  | 0.587904  |
| N  | 2.095134  | 0.126368  | -0.171983 |
| C  | 2.304705  | 1.390444  | 0.203581  |
| C  | -1.167343 | 2.302763  | 0.442321  |
| C  | -1.202587 | 3.638258  | 0.859409  |
| C  | 0.014671  | 4.298238  | 1.060424  |
| C  | 1.224608  | 3.624867  | 0.860683  |
| C  | 1.175094  | 2.289444  | 0.443817  |
| N  | 0.000823  | 1.675631  | 0.225646  |
| H  | 0.020179  | 5.340559  | 1.385098  |
| H  | -2.150721 | 4.151317  | 1.028157  |
| H  | 2.178248  | 4.128040  | 1.027947  |
| C  | -2.304255 | 1.410942  | 0.209064  |
| C  | -3.724101 | -1.748416 | -0.600612 |
| C  | -5.084969 | -2.024610 | -0.667767 |
| C  | -6.058970 | -1.031749 | -0.404829 |
| C  | -5.704762 | 0.270816  | -0.064402 |
| C  | -4.334464 | 0.548171  | 0.002412  |
| C  | -3.348296 | -0.437947 | -0.262847 |
| H  | -2.968152 | -2.508617 | -0.797157 |
| H  | -5.414517 | -3.033056 | -0.927906 |
| H  | -7.117023 | -1.295893 | -0.469825 |
| H  | -6.456734 | 1.035236  | 0.139391  |
| N  | -3.628993 | 1.700672  | 0.299568  |
| H  | -4.030516 | 2.603676  | 0.530520  |
| N  | -2.097691 | 0.134782  | -0.123146 |
| Cr | -0.012973 | -0.382586 | -0.358963 |
| C  | 0.485072  | -2.544466 | 2.248164  |
| H  | 0.488537  | -1.436349 | 2.280798  |
| H  | 1.521813  | -2.833646 | 1.994440  |
| C  | -0.067139 | -2.484517 | -0.261544 |
| H  | 0.922057  | -2.897286 | -0.543727 |
| H  | -0.769751 | -2.877621 | -1.023140 |
| C  | -0.452388 | -3.013620 | 1.127746  |
| H  | -1.484612 | -2.699936 | 1.380743  |
| H  | -0.477746 | -4.123326 | 1.147332  |
| C  | 0.120920  | -3.092710 | 3.626891  |
| H  | -0.899432 | -2.791328 | 3.921120  |
| H  | 0.150803  | -4.195625 | 3.636930  |
| H  | 0.812558  | -2.735350 | 4.407877  |
| C  | -0.186360 | -0.792655 | -3.193860 |
| H  | 0.604982  | -1.548180 | -3.226998 |
| H  | -1.215891 | -1.163712 | -3.185636 |
| C  | 0.088508  | 0.517784  | -3.211523 |
| H  | -0.706446 | 1.271233  | -3.205078 |
| H  | 1.118341  | 0.887553  | -3.250701 |

<sup>5</sup>TS[6A-7A]

Geometry with 57 atoms:



Total energy: -2285.548706310  
C 5.050278 -2.328984 -0.897445  
C 3.722262 -1.908458 -0.880549  
C 3.457238 -0.607463 -0.428854  
C 4.522687 0.236195 -0.019424  
C 5.856273 -0.183169 -0.036139  
C 6.100102 -1.481616 -0.480679  
H 5.287398 -3.337834 -1.242675  
H 2.917109 -2.564039 -1.210411  
H 6.666762 0.474177 0.284466  
H 7.127465 -1.851675 -0.509231  
N 3.930128 1.431419 0.350926  
H 4.410066 2.251778 0.705606  
N 2.265915 0.089423 -0.294420  
C 2.587488 1.306890 0.176958  
C -0.828051 2.458904 0.269978  
C -0.773867 3.793676 0.665596  
C 0.475726 4.367406 0.947890  
C 1.642802 3.597576 0.816332  
C 1.531020 2.268623 0.413511  
N 0.309550 1.708287 0.158770  
H 0.541099 5.411689 1.256904  
H -1.687867 4.385388 0.745603  
H 2.622688 4.036220 1.015372  
C -1.987426 1.677924 -0.103279  
C -3.484615 -1.293383 -1.398138  
C -4.848994 -1.482967 -1.606766  
C -5.790835 -0.475127 -1.305382  
C -5.398143 0.758697 -0.789050  
C -4.028507 0.946553 -0.580720  
C -3.071653 -0.060686 -0.871177  
H -2.762874 -2.071143 -1.644085  
H -5.199995 -2.432484 -2.017083  
H -6.851389 -0.665327 -1.485348  
H -6.123742 1.541604 -0.560669  
N -3.302244 2.022940 -0.100126  
H -3.683309 2.913647 0.200440  
N -1.810601 0.424053 -0.556321  
Cr 0.193887 -0.197392 -0.463321  
C -1.319573 -2.410689 1.592565  
H -1.385801 -3.469796 1.287112  
H -2.173201 -1.900022 1.114250  
C -0.014795 -1.808485 1.101224  
H 0.126644 -0.815835 1.583562  
H 0.863985 -2.405134 1.380462  
C 0.037900 -2.508882 -0.962277  
H -0.937480 -2.972596 -0.803069  
H 0.870616 -3.158497 -0.683155  
C 0.196795 -1.612231 -2.043553  
H 1.171536 -1.529603 -2.535745  
H -0.671902 -1.359313 -2.661027  
C -1.491447 -2.327428 3.117144  
H -0.640782 -2.832310 3.609165  
H -1.437117 -1.267905 3.428194

C -2.807664 -2.936865 3.598937  
H -2.915344 -2.854066 4.692511  
H -3.673827 -2.431727 3.138206  
H -2.873268 -4.006709 3.338304

<sup>57</sup>A

Geometry with 57 atoms:

Total energy: -2285.608682230  
C -5.040126 1.884382 -1.395814  
C -3.714669 1.474546 -1.309812  
C -3.450872 0.285147 -0.609817  
C -4.514012 -0.451290 -0.023984  
C -5.849086 -0.039786 -0.109871  
C -6.090315 1.140922 -0.805822  
H -5.281070 2.804459 -1.933108  
H -2.905483 2.044639 -1.764760  
H -6.658083 -0.614557 0.344619  
H -7.116276 1.504062 -0.900319  
N -3.915244 -1.545118 0.573378  
H -4.390507 -2.284977 1.080547  
N -2.260491 -0.372503 -0.352839  
C -2.579054 -1.461022 0.353123  
C 0.789902 -2.665894 0.706346  
C 0.721933 -3.855355 1.442479  
C -0.540173 -4.303357 1.848156  
C -1.691033 -3.574032 1.528879  
C -1.535563 -2.391691 0.793827  
N -0.320734 -1.979549 0.404531  
H -0.627936 -5.229592 2.419681  
H 1.622529 -4.418278 1.693709  
H -2.677042 -3.921436 1.843260  
C 1.986453 -2.001954 0.182174  
C 3.665089 0.621807 -1.539005  
C 5.041547 0.719735 -1.705413  
C 5.925599 -0.257122 -1.187858  
C 5.461062 -1.365220 -0.485818  
C 4.074610 -1.461831 -0.318778  
C 3.176443 -0.489723 -0.832556  
H 2.981822 1.372841 -1.933557  
H 5.455158 1.572288 -2.248782  
H 7.000137 -0.136743 -1.343922  
H 6.142236 -2.118649 -0.086026  
N 3.277367 -2.399328 0.312186  
H 3.602858 -3.230392 0.795478  
N 1.884085 -0.858968 -0.502221  
Cr -0.152049 -0.173334 -0.740802  
C 0.910577 2.968041 0.228225  
H 1.890572 3.055675 -0.276713  
H 0.963679 2.020033 0.801775  
C -0.052403 1.652902 -1.764952  
H -0.855408 1.668611 -2.529306  
H 0.890210 1.741341 -2.340937  
C -0.196722 2.864693 -0.829029  
H -0.218287 3.818870 -1.395334

|   |           |          |           |
|---|-----------|----------|-----------|
| H | -1.171897 | 2.823437 | -0.304939 |
| C | 0.738985  | 4.129805 | 1.208143  |
| H | -0.242007 | 4.038719 | 1.712028  |
| H | 0.697698  | 5.080287 | 0.644325  |
| C | 1.842526  | 4.216856 | 2.266238  |
| H | 2.821030  | 4.319361 | 1.762118  |
| H | 1.889342  | 3.260533 | 2.820307  |
| C | 1.650840  | 5.368951 | 3.251766  |
| H | 2.460114  | 5.405136 | 3.999419  |
| H | 1.634960  | 6.341690 | 2.731341  |
| H | 0.696712  | 5.273872 | 3.798155  |

<sup>5</sup>TS[7A-13A]

Geometry with 57 atoms:

Total energy: -2285.567482870

|    |           |           |           |
|----|-----------|-----------|-----------|
| C  | -5.063058 | 0.307153  | -0.730502 |
| C  | -3.674869 | 0.380562  | -0.664320 |
| C  | -2.975212 | -0.805498 | -0.396038 |
| C  | -3.674173 | -2.027577 | -0.218059 |
| C  | -5.069920 | -2.103394 | -0.283400 |
| C  | -5.749232 | -0.914339 | -0.539943 |
| H  | -5.638247 | 1.212127  | -0.939089 |
| H  | -3.140960 | 1.317984  | -0.818664 |
| H  | -5.600604 | -3.046777 | -0.142431 |
| H  | -6.839917 | -0.926604 | -0.600542 |
| N  | -2.697747 | -2.983196 | 0.001168  |
| H  | -2.855485 | -3.971237 | 0.169753  |
| N  | -1.617273 | -1.048238 | -0.275930 |
| C  | -1.487520 | -2.361943 | -0.041217 |
| C  | 2.111476  | -2.272821 | 0.067735  |
| C  | 2.533543  | -3.599842 | 0.167528  |
| C  | 1.562269  | -4.607313 | 0.243490  |
| C  | 0.201599  | -4.276871 | 0.196031  |
| C  | -0.155772 | -2.930095 | 0.094644  |
| N  | 0.791111  | -1.958346 | 0.062942  |
| H  | 1.866300  | -5.652783 | 0.319876  |
| H  | 3.597015  | -3.847371 | 0.175279  |
| H  | -0.560930 | -5.057434 | 0.225583  |
| C  | 2.931793  | -1.080395 | -0.077835 |
| C  | 3.292265  | 2.425063  | -0.594905 |
| C  | 4.500480  | 3.114174  | -0.639638 |
| C  | 5.738147  | 2.448726  | -0.479370 |
| C  | 5.809936  | 1.072898  | -0.271013 |
| C  | 4.594236  | 0.381702  | -0.224498 |
| C  | 3.346643  | 1.039911  | -0.379247 |
| H  | 2.332612  | 2.927993  | -0.727605 |
| H  | 4.497523  | 4.193722  | -0.806487 |
| H  | 6.662709  | 3.029091  | -0.522222 |
| H  | 6.766710  | 0.561596  | -0.149489 |
| N  | 4.286364  | -0.955192 | -0.039781 |
| H  | 4.951071  | -1.705275 | 0.117887  |
| N  | 2.335276  | 0.100854  | -0.284983 |
| Cr | 0.219044  | 0.007517  | -0.069614 |
| C  | 0.107328  | 0.769249  | 2.026303  |

|   |           |          |           |
|---|-----------|----------|-----------|
| H | -0.695628 | 0.191005 | 2.496757  |
| H | 1.126055  | 0.577890 | 2.375290  |
| C | -0.192908 | 1.957953 | 1.362958  |
| H | -0.210280 | 1.602234 | -0.394936 |
| C | -1.560513 | 2.595513 | 1.406441  |
| H | -1.621857 | 3.094981 | 2.392229  |
| H | -2.335632 | 1.811671 | 1.422478  |
| C | -1.853712 | 3.624832 | 0.315301  |
| H | -1.069889 | 4.404200 | 0.328880  |
| H | -1.773736 | 3.141628 | -0.674971 |
| H | 0.634164  | 2.653410 | 1.175907  |
| C | -3.228658 | 4.281480 | 0.458329  |
| C | -3.529480 | 5.292377 | -0.646843 |
| H | -3.296262 | 4.776912 | 1.443751  |
| H | -4.005995 | 3.495557 | 0.464799  |
| H | -3.505997 | 4.816904 | -1.642384 |
| H | -4.524264 | 5.748923 | -0.519061 |
| H | -2.787783 | 6.109057 | -0.655362 |

<sup>5</sup>8A

Geometry with 63 atoms:

Total energy: -2364.154317280

|   |           |           |           |
|---|-----------|-----------|-----------|
| C | -4.970111 | 0.363019  | -2.140920 |
| C | -3.608637 | 0.329524  | -1.862075 |
| C | -3.183505 | -0.503135 | -0.813753 |
| C | -4.126595 | -1.270856 | -0.081025 |
| C | -5.497822 | -1.237741 | -0.359863 |
| C | -5.899751 | -0.407386 | -1.402202 |
| H | -5.335479 | 1.000014  | -2.949569 |
| H | -2.889196 | 0.923932  | -2.424972 |
| H | -6.214840 | -1.832194 | 0.209426  |
| H | -6.960380 | -0.347710 | -1.657120 |
| N | -3.383590 | -1.965991 | 0.855472  |
| H | -3.748271 | -2.622592 | 1.537480  |
| N | -1.919874 | -0.750056 | -0.309051 |
| C | -2.078111 | -1.629853 | 0.682809  |
| C | 1.411454  | -1.868359 | 1.516849  |
| C | 1.503779  | -2.693933 | 2.642603  |
| C | 0.321336  | -3.237294 | 3.156584  |
| C | -0.909734 | -2.941729 | 2.560684  |
| C | -0.916681 | -2.106563 | 1.436481  |
| N | 0.227828  | -1.612334 | 0.936082  |
| H | 0.356839  | -3.883431 | 4.036012  |
| H | 2.467069  | -2.896670 | 3.113973  |
| H | -1.837596 | -3.342045 | 2.972187  |
| C | 2.501186  | -1.158448 | 0.848972  |
| C | 3.783388  | 1.154367  | -1.529056 |
| C | 5.126741  | 1.470001  | -1.699166 |
| C | 6.137258  | 0.871440  | -0.909223 |
| C | 5.838015  | -0.061978 | 0.079303  |
| C | 4.485337  | -0.378856 | 0.250060  |
| C | 3.462698  | 0.211293  | -0.538787 |
| H | 2.999775  | 1.616103  | -2.129949 |
| H | 5.413117  | 2.199773  | -2.459736 |

|    |           |           |           |    |           |           |           |
|----|-----------|-----------|-----------|----|-----------|-----------|-----------|
| H  | 7.179486  | 1.151501  | -1.078947 | N  | -0.931985 | -1.779705 | 0.780682  |
| H  | 6.617833  | -0.521244 | 0.689647  | H  | -1.854742 | -4.477129 | 3.402292  |
| N  | 3.830306  | -1.237799 | 1.114729  | H  | 0.444773  | -4.417834 | 2.412069  |
| H  | 4.264886  | -1.830587 | 1.814442  | H  | -3.561847 | -2.790294 | 2.670976  |
| N  | 2.240833  | -0.299432 | -0.138586 | C  | 1.240914  | -2.501233 | 0.451024  |
| Cr | 0.152213  | -0.205153 | -0.679270 | C  | 3.218548  | -0.811799 | -1.997684 |
| C  | -0.876268 | 2.962558  | 0.197932  | C  | 4.547155  | -1.102896 | -2.300729 |
| H  | -0.883555 | 2.051260  | 0.829300  | C  | 5.250508  | -2.129345 | -1.634360 |
| H  | -1.864326 | 2.980635  | -0.299012 | C  | 4.644696  | -2.902339 | -0.645046 |
| C  | 0.065799  | 1.595063  | -1.763653 | C  | 3.311729  | -2.608086 | -0.343964 |
| H  | -0.889529 | 1.664729  | -2.321593 | C  | 2.593916  | -1.573521 | -0.999117 |
| H  | 0.853875  | 1.593282  | -2.542275 | H  | 2.682776  | -0.023190 | -2.523680 |
| C  | 0.219571  | 2.833869  | -0.867718 | H  | 5.057051  | -0.525057 | -3.074884 |
| H  | 1.203597  | 2.812058  | -0.358782 | H  | 6.291513  | -2.324279 | -1.901892 |
| H  | 0.226940  | 3.769676  | -1.464445 | H  | 5.183515  | -3.700289 | -0.130429 |
| C  | -0.740919 | 4.190621  | 1.099470  | N  | 2.422386  | -3.165418 | 0.557919  |
| H  | 0.246532  | 4.171045  | 1.598571  | H  | 2.616738  | -3.936447 | 1.187397  |
| H  | -0.741794 | 5.103641  | 0.475406  | N  | 1.307811  | -1.529817 | -0.478310 |
| C  | 0.585418  | -1.386289 | -3.308256 | Cr | -0.471305 | -0.413905 | -0.605487 |
| H  | -0.222071 | -0.848857 | -3.815181 | C  | 1.592624  | 2.395825  | -0.169455 |
| H  | 1.598085  | -0.997306 | -3.453172 | H  | 1.559171  | 3.122394  | -1.000294 |
| C  | 0.350533  | -2.483265 | -2.577207 | H  | 2.423580  | 1.703345  | -0.394685 |
| H  | 1.162519  | -3.034779 | -2.091486 | C  | 0.287876  | 1.624803  | -0.094371 |
| H  | -0.660227 | -2.887299 | -2.458836 | H  | 0.325252  | 0.972515  | 0.806015  |
| C  | -1.840586 | 4.303470  | 2.158958  | H  | -0.587404 | 2.281191  | 0.013785  |
| C  | -1.698163 | 5.531641  | 3.056987  | C  | 0.086117  | 1.206051  | -2.230361 |
| H  | -1.840184 | 3.388094  | 2.780302  | H  | 1.160532  | 1.329504  | -2.374321 |
| H  | -2.825350 | 4.324473  | 1.656888  | H  | -0.463878 | 2.149366  | -2.274804 |
| H  | -2.504093 | 5.584635  | 3.807319  | C  | -0.523810 | 0.019602  | -2.688250 |
| H  | -0.737499 | 5.522179  | 3.600131  | H  | -1.578442 | 0.029944  | -2.981689 |
| H  | -1.731578 | 6.463553  | 2.467216  | H  | 0.096330  | -0.759426 | -3.144773 |

<sup>5</sup>TS[8A-9A]

Geometry with 63 atoms:

Total energy: -2364.127486900

|   |           |           |           |
|---|-----------|-----------|-----------|
| C | -4.667434 | 2.659652  | -1.699682 |
| C | -3.484551 | 1.941290  | -1.537257 |
| C | -3.475649 | 0.908498  | -0.588404 |
| C | -4.643768 | 0.621989  | 0.165368  |
| C | -5.831338 | 1.341674  | 0.004524  |
| C | -5.821630 | 2.365514  | -0.941840 |
| H | -4.705121 | 3.469279  | -2.432076 |
| H | -2.598083 | 2.172331  | -2.126741 |
| H | -6.723883 | 1.110261  | 0.589056  |
| H | -6.729017 | 2.952144  | -1.102322 |
| N | -4.305560 | -0.439491 | 0.987974  |
| H | -4.915112 | -0.891682 | 1.660945  |
| N | -2.477405 | 0.024913  | -0.206475 |
| C | -3.010599 | -0.768301 | 0.738785  |
| C | -0.000050 | -2.707170 | 1.164835  |
| C | -0.305770 | -3.685244 | 2.109307  |
| C | -1.594966 | -3.717154 | 2.664088  |
| C | -2.551542 | -2.772233 | 2.257671  |
| C | -2.193441 | -1.814084 | 1.313483  |

<sup>5</sup>9A

Geometry with 63 atoms:

Total energy: -2364.187155250

|   |           |          |           |
|---|-----------|----------|-----------|
| C | -4.045500 | 3.640827 | -1.648433 |
| C | -3.100485 | 2.627087 | -1.540515 |
| C | -3.335693 | 1.624177 | -0.584975 |
| C | -4.501487 | 1.666150 | 0.224386  |
| C | -5.453036 | 2.687069 | 0.117889  |
| C | -5.202191 | 3.671512 | -0.833145 |

|    |           |           |           |
|----|-----------|-----------|-----------|
| H  | -3.894264 | 4.436582  | -2.381305 |
| H  | -2.210145 | 2.602133  | -2.167464 |
| H  | -6.345094 | 2.709392  | 0.746510  |
| H  | -5.916060 | 4.489544  | -0.954488 |
| N  | -4.423626 | 0.549813  | 1.036449  |
| H  | -5.101583 | 0.274765  | 1.739830  |
| N  | -2.597087 | 0.505218  | -0.241656 |
| C  | -3.279068 | -0.110089 | 0.728042  |
| C  | -0.940576 | -2.803846 | 1.190925  |
| C  | -1.471879 | -3.634656 | 2.185536  |
| C  | -2.701439 | -3.277386 | 2.750161  |
| C  | -3.370438 | -2.123327 | 2.327197  |
| C  | -2.770364 | -1.346830 | 1.328105  |
| N  | -1.592348 | -1.701240 | 0.795296  |
| H  | -3.143371 | -3.905025 | 3.526758  |
| H  | -0.947792 | -4.533704 | 2.513890  |
| H  | -4.331298 | -1.843187 | 2.762526  |
| C  | 0.317746  | -2.971671 | 0.458525  |
| C  | 2.731216  | -1.993070 | -1.965991 |
| C  | 3.927160  | -2.654298 | -2.219554 |
| C  | 4.297063  | -3.822194 | -1.510250 |
| C  | 3.482098  | -4.367068 | -0.522460 |
| C  | 2.278961  | -3.699399 | -0.267749 |
| C  | 1.895500  | -2.527736 | -0.971733 |
| H  | 2.442408  | -1.092800 | -2.507446 |
| H  | 4.602136  | -2.264709 | -2.984907 |
| H  | 5.247279  | -4.307606 | -1.744519 |
| H  | 3.767356  | -5.267056 | 0.025357  |
| N  | 1.251201  | -3.942865 | 0.624518  |
| H  | 1.203803  | -4.709961 | 1.287883  |
| N  | 0.668762  | -2.102909 | -0.493359 |
| Cr | -0.759364 | -0.498332 | -0.773472 |
| C  | 1.897705  | 1.742936  | -0.895034 |
| H  | 2.653994  | 1.190074  | -1.482632 |
| H  | 1.621233  | 1.061835  | -0.064444 |
| C  | -0.000824 | 0.723407  | -2.301061 |
| H  | -0.840772 | 0.985474  | -2.976024 |
| H  | 0.716388  | 0.170229  | -2.940051 |
| C  | 0.667516  | 2.003998  | -1.772278 |
| H  | 0.975034  | 2.676006  | -2.600191 |
| H  | -0.059079 | 2.596089  | -1.181479 |
| C  | 2.534355  | 3.004176  | -0.308689 |
| H  | 1.777684  | 3.550960  | 0.285077  |
| H  | 2.818289  | 3.686131  | -1.131414 |
| C  | 3.759580  | 2.728097  | 0.566052  |
| H  | 4.522634  | 2.196593  | -0.032848 |
| H  | 3.478070  | 2.030758  | 1.378026  |
| C  | 4.381363  | 3.986186  | 1.176239  |
| H  | 4.659687  | 4.685681  | 0.365889  |
| H  | 3.618623  | 4.514820  | 1.778644  |
| C  | 5.609537  | 3.710602  | 2.047990  |
| C  | 6.215919  | 4.973708  | 2.658179  |
| H  | 6.373269  | 3.188248  | 1.442954  |
| H  | 5.331688  | 3.006813  | 2.854357  |

|   |          |          |          |
|---|----------|----------|----------|
| H | 7.099009 | 4.744270 | 3.276781 |
| H | 6.533631 | 5.683328 | 1.875166 |
| H | 5.487223 | 5.498031 | 3.300004 |

<sup>5</sup>TS[9A-14A]

Geometry with 63 atoms:

Total energy: -2364.146126080

|    |           |           |           |
|----|-----------|-----------|-----------|
| C  | 4.296384  | 1.859355  | -0.672575 |
| C  | 3.050084  | 1.245052  | -0.599148 |
| C  | 1.935481  | 2.065999  | -0.372140 |
| C  | 2.090173  | 3.470412  | -0.243263 |
| C  | 3.342919  | 4.090116  | -0.316095 |
| C  | 4.440436  | 3.258898  | -0.529926 |
| H  | 5.185234  | 1.249086  | -0.848523 |
| H  | 2.930830  | 0.168751  | -0.717245 |
| H  | 3.455330  | 5.171023  | -0.212865 |
| H  | 5.437779  | 3.699842  | -0.594778 |
| N  | 0.811679  | 3.967545  | -0.060125 |
| H  | 0.562610  | 4.943093  | 0.062718  |
| N  | 0.591923  | 1.753684  | -0.257168 |
| C  | -0.051911 | 2.915865  | -0.074695 |
| C  | -3.325558 | 1.416603  | -0.026059 |
| C  | -4.239944 | 2.469732  | 0.038755  |
| C  | -3.746295 | 3.779268  | 0.118114  |
| C  | -2.364540 | 4.013795  | 0.102892  |
| C  | -1.502928 | 2.916053  | 0.032993  |
| N  | -1.989905 | 1.650459  | 0.008772  |
| H  | -4.440516 | 4.620059  | 0.170151  |
| H  | -5.313719 | 2.274530  | 0.017703  |
| H  | -1.970921 | 5.031660  | 0.132280  |
| C  | -3.600241 | -0.004910 | -0.167372 |
| C  | -2.512168 | -3.371078 | -0.578460 |
| C  | -3.341824 | -4.486914 | -0.630551 |
| C  | -4.747473 | -4.368836 | -0.527542 |
| C  | -5.370581 | -3.132583 | -0.370659 |
| C  | -4.535293 | -2.011380 | -0.315871 |
| C  | -3.123948 | -2.119285 | -0.414833 |
| H  | -1.426694 | -3.449559 | -0.663450 |
| H  | -2.901600 | -5.478718 | -0.756449 |
| H  | -5.360956 | -5.271653 | -0.573253 |
| H  | -6.455725 | -3.044286 | -0.291835 |
| N  | -4.793442 | -0.659432 | -0.164928 |
| H  | -5.707881 | -0.233866 | -0.056264 |
| N  | -2.575088 | -0.853181 | -0.323223 |
| Cr | -0.688226 | 0.068588  | -0.021741 |
| C  | -0.438043 | -0.455623 | 2.133880  |
| H  | 0.000990  | 0.443886  | 2.579241  |
| H  | -1.459034 | -0.708566 | 2.433402  |
| C  | 0.394866  | -1.431443 | 1.588731  |
| H  | 0.328279  | -1.261465 | -0.198755 |
| C  | 1.899453  | -1.368007 | 1.707013  |
| H  | 2.134056  | -1.699327 | 2.736577  |
| H  | 2.227163  | -0.316596 | 1.651338  |
| C  | 2.689098  | -2.226527 | 0.719008  |

|   |           |           |           |
|---|-----------|-----------|-----------|
| H | 2.395241  | -3.285615 | 0.833871  |
| H | 2.401589  | -1.950366 | -0.310868 |
| H | -0.020130 | -2.437068 | 1.452358  |
| C | 4.204355  | -2.089988 | 0.881519  |
| C | 5.003542  | -2.862033 | -0.170205 |
| H | 4.500867  | -2.426291 | 1.891961  |
| H | 4.477614  | -1.019771 | 0.831552  |
| H | 4.744292  | -3.935667 | -0.113786 |
| H | 4.690396  | -2.531833 | -1.178954 |
| C | 6.519741  | -2.698639 | -0.036407 |
| C | 7.307707  | -3.465692 | -1.097394 |
| H | 6.833420  | -3.029558 | 0.970451  |
| H | 6.773914  | -1.623698 | -0.091700 |
| H | 8.394364  | -3.325850 | -0.977358 |
| H | 7.103848  | -4.548693 | -1.042528 |
| H | 7.039654  | -3.132384 | -2.114758 |

### <sup>5</sup>10A

Geometry with 69 atoms:

Total energy: -2442.732847910

|   |           |           |           |
|---|-----------|-----------|-----------|
| C | -4.390460 | 3.301029  | -1.747769 |
| C | -3.377239 | 2.361725  | -1.593182 |
| C | -3.408166 | 1.563096  | -0.438008 |
| C | -4.440763 | 1.729871  | 0.522196  |
| C | -5.461361 | 2.675098  | 0.367680  |
| C | -5.416014 | 3.454901  | -0.784402 |
| H | -4.396726 | 3.940239  | -2.633539 |
| H | -2.581783 | 2.243695  | -2.328822 |
| H | -6.251594 | 2.794870  | 1.111201  |
| H | -6.190928 | 4.207171  | -0.948988 |
| N | -4.166719 | 0.809434  | 1.517382  |
| H | -4.711197 | 0.661776  | 2.360811  |
| N | -2.554832 | 0.564474  | -0.004623 |
| C | -3.038716 | 0.140242  | 1.165167  |
| C | -0.447544 | -2.276378 | 1.781662  |
| C | -0.713776 | -2.837596 | 3.036949  |
| C | -1.854164 | -2.406423 | 3.723704  |
| C | -2.687484 | -1.428806 | 3.169358  |
| C | -2.347665 | -0.911909 | 1.913223  |
| N | -1.266473 | -1.354061 | 1.251655  |
| H | -2.089600 | -2.829572 | 4.702345  |
| H | -0.052344 | -3.588206 | 3.473046  |
| H | -3.572239 | -1.076677 | 3.702891  |
| C | 0.687344  | -2.553006 | 0.897804  |
| C | 2.586758  | -2.041164 | -2.066864 |
| C | 3.768191  | -2.699444 | -2.388040 |
| C | 4.336793  | -3.668871 | -1.527662 |
| C | 3.741496  | -4.012206 | -0.317314 |
| C | 2.551693  | -3.349260 | 0.004427  |
| C | 1.971034  | -2.374635 | -0.849026 |
| H | 2.147022  | -1.290774 | -2.723287 |
| H | 4.274402  | -2.463745 | -3.326871 |
| H | 5.267248  | -4.159972 | -1.821785 |
| H | 4.180745  | -4.759156 | 0.346424  |

|    |           |           |           |
|----|-----------|-----------|-----------|
| N  | 1.706161  | -3.430352 | 1.095578  |
| H  | 1.828859  | -4.033440 | 1.902648  |
| N  | 0.813439  | -1.899461 | -0.259995 |
| Cr | -0.784960 | -0.487326 | -0.649081 |
| C  | 1.857474  | 1.744425  | -0.941927 |
| H  | 2.549390  | 1.077408  | -1.489367 |
| H  | 1.568722  | 1.180668  | -0.032289 |
| C  | -0.097653 | 0.701783  | -2.243926 |
| H  | -0.955857 | 0.950675  | -2.898912 |
| H  | 0.585222  | 0.111070  | -2.887433 |
| C  | 0.613637  | 1.991378  | -1.804454 |
| H  | 0.920185  | 2.603123  | -2.678408 |
| H  | -0.086043 | 2.636398  | -1.236677 |
| C  | 2.605607  | 3.011685  | -0.524700 |
| H  | 1.917213  | 3.679998  | 0.026200  |
| H  | 2.905927  | 3.571892  | -1.429462 |
| C  | 3.842857  | 2.738218  | 0.333720  |
| H  | 4.524356  | 2.063323  | -0.217416 |
| H  | 3.540927  | 2.181351  | 1.241332  |
| C  | 4.606646  | 3.998543  | 0.745940  |
| H  | 4.906139  | 4.556063  | -0.161183 |
| H  | 3.927923  | 4.673255  | 1.301036  |
| C  | 5.847889  | 3.719427  | 1.597691  |
| C  | 6.605039  | 4.984259  | 2.000712  |
| H  | 6.524470  | 3.045007  | 1.041170  |
| H  | 5.547912  | 3.162716  | 2.504940  |
| H  | 7.492727  | 4.750968  | 2.611312  |
| H  | 6.949188  | 5.544004  | 1.114283  |
| H  | 5.965365  | 5.663775  | 2.589741  |
| C  | -2.496691 | -2.758885 | -1.815626 |
| H  | -1.875173 | -3.615574 | -1.534721 |
| H  | -3.428727 | -2.621984 | -1.257503 |
| C  | -2.146146 | -1.933689 | -2.809370 |
| H  | -2.778239 | -1.091391 | -3.107854 |
| H  | -1.227170 | -2.083796 | -3.384690 |

### <sup>5</sup>TS[10A-11A]

Geometry with 69 atoms:

Total energy: -2442.706082570

|   |          |           |           |
|---|----------|-----------|-----------|
| C | 4.815368 | -3.266814 | -1.919940 |
| C | 3.831230 | -2.296621 | -1.743278 |
| C | 3.811838 | -1.603569 | -0.524329 |
| C | 4.778245 | -1.891077 | 0.474871  |
| C | 5.766826 | -2.863587 | 0.299982  |
| C | 5.766827 | -3.547046 | -0.915016 |
| H | 4.855102 | -3.823586 | -2.858907 |
| H | 3.104532 | -2.078587 | -2.525014 |
| H | 6.503169 | -3.076744 | 1.077147  |
| H | 6.521713 | -4.316022 | -1.094393 |
| N | 4.491026 | -1.038487 | 1.526993  |
| H | 4.988712 | -0.987363 | 2.409360  |
| N | 2.976915 | -0.600442 | -0.055344 |
| C | 3.414291 | -0.287232 | 1.176245  |
| C | 0.912937 | 2.253448  | 1.712859  |

|    |           |           |           |
|----|-----------|-----------|-----------|
| C  | 1.202338  | 2.818109  | 2.953933  |
| C  | 2.290563  | 2.322917  | 3.689440  |
| C  | 3.071196  | 1.280665  | 3.163896  |
| C  | 2.738731  | 0.755302  | 1.917883  |
| N  | 1.668842  | 1.229516  | 1.210576  |
| H  | 2.534998  | 2.754304  | 4.661274  |
| H  | 0.598358  | 3.639036  | 3.345196  |
| H  | 3.928981  | 0.892164  | 3.716509  |
| C  | -0.127641 | 2.619186  | 0.775675  |
| C  | -1.728696 | 2.331267  | -2.403566 |
| C  | -2.833234 | 3.071660  | -2.819328 |
| C  | -3.438096 | 4.032979  | -1.980717 |
| C  | -2.953273 | 4.290510  | -0.699327 |
| C  | -1.844514 | 3.546647  | -0.284736 |
| C  | -1.233561 | 2.568983  | -1.112735 |
| H  | -1.261219 | 1.599994  | -3.061191 |
| H  | -3.240513 | 2.908115  | -3.819618 |
| H  | -4.303291 | 4.590713  | -2.346248 |
| H  | -3.415997 | 5.037259  | -0.051457 |
| N  | -1.115451 | 3.546465  | 0.892060  |
| H  | -1.286954 | 4.134105  | 1.700972  |
| N  | -0.172221 | 2.004500  | -0.420065 |
| Cr | 1.244973  | 0.464278  | -0.597996 |
| C  | -1.657093 | -1.286523 | -0.992469 |
| H  | -1.854225 | -1.773643 | -1.963444 |
| H  | -2.024780 | -0.249961 | -1.087291 |
| C  | -0.165801 | -1.277998 | -0.708608 |
| H  | -0.010963 | -0.950907 | 0.343009  |
| H  | 0.293709  | -2.272266 | -0.792431 |
| C  | 0.596436  | -0.579906 | -2.625168 |
| H  | -0.432295 | -0.411932 | -2.949257 |
| H  | 0.944211  | -1.597730 | -2.816836 |
| C  | 1.515190  | 0.491540  | -2.704526 |
| H  | 2.574892  | 0.281975  | -2.884235 |
| H  | 1.160326  | 1.475540  | -3.029082 |
| C  | -2.475065 | -2.001959 | 0.092575  |
| H  | -2.108446 | -3.038587 | 0.205680  |
| H  | -2.295735 | -1.509769 | 1.066701  |
| C  | -3.978097 | -2.016707 | -0.197229 |
| H  | -4.333051 | -0.977141 | -0.326407 |
| H  | -4.157673 | -2.517514 | -1.166511 |
| C  | -4.808276 | -2.703987 | 0.889236  |
| C  | -6.311117 | -2.713979 | 0.600678  |
| H  | -4.626121 | -2.203783 | 1.858979  |
| H  | -4.453366 | -3.743582 | 1.016798  |
| H  | -6.664808 | -1.673860 | 0.469784  |
| H  | -6.493480 | -3.216045 | -0.367958 |
| C  | -7.145963 | -3.396754 | 1.687413  |
| C  | -8.644461 | -3.399618 | 1.388016  |
| H  | -6.962673 | -2.894107 | 2.655013  |
| H  | -6.792227 | -4.436041 | 1.816857  |
| H  | -9.218292 | -3.896459 | 2.187291  |
| H  | -9.035090 | -2.372378 | 1.287498  |
| H  | -8.863392 | -3.927740 | 0.444184  |

<sup>51</sup>1A

Geometry with 69 atoms:

Total energy: -2442.765742210

|    |           |           |           |
|----|-----------|-----------|-----------|
| C  | 3.189372  | -4.726264 | -1.655164 |
| C  | 2.691049  | -3.433298 | -1.545013 |
| C  | 3.168452  | -2.645853 | -0.483653 |
| C  | 4.121850  | -3.173229 | 0.426520  |
| C  | 4.624729  | -4.474963 | 0.316498  |
| C  | 4.139992  | -5.239496 | -0.740416 |
| H  | 2.839495  | -5.366193 | -2.468333 |
| H  | 1.958739  | -3.037055 | -2.247511 |
| H  | 5.356971  | -4.869823 | 1.023140  |
| H  | 4.501682  | -6.262383 | -0.867904 |
| N  | 4.366118  | -2.156112 | 1.330727  |
| H  | 5.003689  | -2.201197 | 2.119250  |
| N  | 2.867903  | -1.348149 | -0.109192 |
| C  | 3.601144  | -1.091520 | 0.977718  |
| C  | 2.381898  | 2.258155  | 1.462890  |
| C  | 3.032037  | 2.768519  | 2.592658  |
| C  | 3.950622  | 1.942394  | 3.248898  |
| C  | 4.201914  | 0.647534  | 2.781867  |
| C  | 3.510393  | 0.212512  | 1.643666  |
| N  | 2.634865  | 1.017267  | 1.023716  |
| H  | 4.475986  | 2.310286  | 4.132666  |
| H  | 2.832320  | 3.779973  | 2.950194  |
| H  | 4.918312  | 0.002583  | 3.293221  |
| C  | 1.384933  | 2.930531  | 0.626281  |
| C  | -0.875800 | 3.076949  | -2.116685 |
| C  | -1.681609 | 4.163772  | -2.434991 |
| C  | -1.668590 | 5.351286  | -1.664530 |
| C  | -0.849051 | 5.490554  | -0.548322 |
| C  | -0.038995 | 4.394827  | -0.228651 |
| C  | -0.040994 | 3.198852  | -0.993825 |
| H  | -0.883544 | 2.159386  | -2.704085 |
| H  | -2.343875 | 4.103301  | -3.301546 |
| H  | -2.319406 | 6.179464  | -1.954308 |
| H  | -0.839482 | 6.405694  | 0.046536  |
| N  | 0.876765  | 4.178867  | 0.784846  |
| H  | 1.123609  | 4.836554  | 1.517537  |
| N  | 0.857835  | 2.309654  | -0.431998 |
| Cr | 1.614916  | 0.301179  | -0.723194 |
| C  | -1.698370 | -0.717634 | -1.380922 |
| H  | -2.064157 | 0.112889  | -2.012677 |
| H  | -1.335072 | -0.236140 | -0.450758 |
| C  | 0.644997  | -0.472588 | -2.411420 |
| H  | 1.408007  | -1.013097 | -3.007906 |
| H  | 0.291992  | 0.343215  | -3.073928 |
| C  | -0.529756 | -1.411219 | -2.090731 |
| H  | -0.927141 | -1.892207 | -3.008530 |
| H  | -0.185192 | -2.251783 | -1.456348 |
| C  | -2.868304 | -1.641447 | -1.037616 |
| H  | -2.507065 | -2.465040 | -0.393338 |
| H  | -3.234684 | -2.124551 | -1.962243 |

|   |            |           |           |
|---|------------|-----------|-----------|
| C | -4.032219  | -0.928798 | -0.344725 |
| H | -4.396235  | -0.110979 | -0.994349 |
| H | -3.663236  | -0.436878 | 0.575320  |
| C | -5.201476  | -1.850117 | 0.010102  |
| H | -5.566208  | -2.346245 | -0.908422 |
| H | -4.838943  | -2.663969 | 0.665585  |
| C | -6.367997  | -1.132152 | 0.693050  |
| C | -7.535136  | -2.053630 | 1.054478  |
| H | -6.733136  | -0.322389 | 0.033987  |
| H | -6.002005  | -0.630599 | 1.608745  |
| H | -7.899015  | -2.558186 | 0.139838  |
| H | -7.171289  | -2.861495 | 1.716941  |
| C | -8.704835  | -1.334298 | 1.731868  |
| C | -9.862833  | -2.264221 | 2.092074  |
| H | -9.069374  | -0.529950 | 1.066750  |
| H | -8.339475  | -0.827378 | 2.644052  |
| H | -10.689348 | -1.717514 | 2.574967  |
| H | -10.271598 | -2.760440 | 1.195230  |
| H | -9.538215  | -3.057784 | 2.786771  |

<sup>5</sup>12A

Geometry with 51 atoms:

Total energy: -2207.005527920

|   |           |           |           |
|---|-----------|-----------|-----------|
| C | 4.951189  | -1.865294 | -1.307687 |
| C | 3.586880  | -1.640972 | -1.167817 |
| C | 3.187712  | -0.364032 | -0.742618 |
| C | 4.149099  | 0.643978  | -0.471998 |
| C | 5.523637  | 0.418434  | -0.612739 |
| C | 5.903081  | -0.852714 | -1.034400 |
| H | 5.303027  | -2.845358 | -1.637761 |
| H | 2.841378  | -2.409928 | -1.376337 |
| H | 6.258926  | 1.197430  | -0.403462 |
| H | 6.965095  | -1.076356 | -1.159515 |
| N | 3.417800  | 1.752429  | -0.080415 |
| H | 3.797712  | 2.658411  | 0.174412  |
| N | 1.928331  | 0.150308  | -0.504500 |
| C | 2.102516  | 1.415742  | -0.116477 |
| C | -1.404942 | 2.141483  | 0.210967  |
| C | -1.507252 | 3.489097  | 0.576813  |
| C | -0.322954 | 4.213733  | 0.751505  |
| C | 0.920186  | 3.603020  | 0.552355  |
| C | 0.937856  | 2.252896  | 0.182763  |
| N | -0.205261 | 1.564864  | 0.036284  |
| H | -0.369415 | 5.266447  | 1.037729  |
| H | -2.479682 | 3.964586  | 0.714946  |
| H | 1.846086  | 4.167142  | 0.674582  |
| C | -2.492057 | 1.191812  | -0.041644 |
| C | -3.699861 | -2.025921 | -0.956230 |
| C | -5.037417 | -2.401965 | -0.991579 |
| C | -6.073645 | -1.495923 | -0.657620 |
| C | -5.808750 | -0.183422 | -0.276802 |
| C | -4.461286 | 0.194765  | -0.239638 |
| C | -3.415640 | -0.705712 | -0.572256 |
| H | -2.889817 | -2.710480 | -1.213750 |

|    |           |           |           |
|----|-----------|-----------|-----------|
| H  | -5.301116 | -3.420737 | -1.284567 |
| H  | -7.110296 | -1.837900 | -0.700596 |
| H  | -6.609517 | 0.512300  | -0.019674 |
| N  | -3.830824 | 1.382621  | 0.088445  |
| H  | -4.287796 | 2.239233  | 0.384496  |
| N  | -2.208341 | -0.050652 | -0.437447 |
| Cr | -0.112457 | -0.478405 | -0.577022 |
| C  | -0.199593 | -1.119337 | 2.404402  |
| H  | 0.672259  | -0.547127 | 2.734760  |
| H  | -1.173558 | -0.632176 | 2.503371  |
| C  | -0.103719 | -2.381893 | 1.958865  |
| H  | -0.033102 | -1.995075 | -1.327932 |
| C  | 1.153462  | -3.190592 | 1.807586  |
| H  | 1.231285  | -3.482614 | 0.743628  |
| H  | 1.009450  | -4.144005 | 2.349627  |
| C  | 2.443437  | -2.518137 | 2.265635  |
| H  | 2.628484  | -1.583125 | 1.714423  |
| H  | 2.412664  | -2.276370 | 3.340798  |
| H  | 3.308985  | -3.176268 | 2.093606  |
| H  | -1.025653 | -2.897565 | 1.660858  |

<sup>5</sup>13A

Geometry with 57 atoms:

Total energy: -2285.586167870

|   |           |           |           |
|---|-----------|-----------|-----------|
| C | 4.725314  | -0.801924 | -1.884488 |
| C | 3.353108  | -0.777974 | -1.666997 |
| C | 2.821451  | 0.366543  | -1.052313 |
| C | 3.662839  | 1.446885  | -0.678965 |
| C | 5.045538  | 1.423130  | -0.897818 |
| C | 5.557246  | 0.279595  | -1.505065 |
| H | 5.178728  | -1.676147 | -2.356771 |
| H | 2.699139  | -1.602669 | -1.953649 |
| H | 5.688858  | 2.255729  | -0.607604 |
| H | 6.631029  | 0.213460  | -1.694668 |
| N | 2.820859  | 2.388293  | -0.111620 |
| H | 3.097781  | 3.289202  | 0.265151  |
| N | 1.522601  | 0.674223  | -0.697119 |
| C | 1.558483  | 1.889088  | -0.145104 |
| C | -1.982867 | 2.085109  | 0.456060  |
| C | -2.229740 | 3.349979  | 1.003362  |
| C | -1.139020 | 4.202286  | 1.208041  |
| C | 0.154914  | 3.796603  | 0.861684  |
| C | 0.318785  | 2.517520  | 0.317781  |
| N | -0.734561 | 1.703854  | 0.143047  |
| H | -1.299312 | 5.194895  | 1.633954  |
| H | -3.243755 | 3.663979  | 1.256803  |
| H | 1.006848  | 4.462053  | 1.007691  |
| C | -2.953731 | 1.034025  | 0.140262  |
| C | -3.802663 | -2.194086 | -1.088455 |
| C | -5.086790 | -2.723902 | -1.133823 |
| C | -6.210088 | -1.991367 | -0.678119 |
| C | -6.088616 | -0.704696 | -0.160755 |
| C | -4.794944 | -0.171986 | -0.113194 |
| C | -3.662529 | -0.897789 | -0.567432 |

|    |           |           |           |    |           |           |           |
|----|-----------|-----------|-----------|----|-----------|-----------|-----------|
| H  | -2.927760 | -2.742887 | -1.441311 | C  | 3.421129  | 0.906905  | -0.192145 |
| H  | -5.238698 | -3.729365 | -1.532803 | C  | 4.098923  | -2.325897 | 1.126176  |
| H  | -7.200204 | -2.449381 | -0.735874 | C  | 5.341827  | -2.947903 | 1.128244  |
| H  | -6.956755 | -0.142671 | 0.188438  | C  | 6.489988  | -2.317700 | 0.588914  |
| N  | -4.299341 | 1.043773  | 0.325028  | C  | 6.435297  | -1.044403 | 0.028955  |
| H  | -4.844007 | 1.805357  | 0.716716  | C  | 5.182997  | -0.418736 | 0.025482  |
| N  | -2.537814 | -0.116492 | -0.394507 | C  | 4.026247  | -1.041680 | 0.562987  |
| Cr | -0.422657 | -0.222811 | -0.704256 | H  | 3.205640  | -2.796698 | 1.540352  |
| C  | -0.199966 | -1.183951 | 2.136481  | H  | 5.441058  | -3.947844 | 1.556676  |
| H  | 0.644141  | -0.570608 | 2.464181  | H  | 7.445310  | -2.847034 | 0.613684  |
| H  | -1.200120 | -0.802226 | 2.358770  | H  | 7.321688  | -0.560607 | -0.385397 |
| C  | -0.035106 | -2.384521 | 1.558177  | N  | 4.753311  | 0.812027  | -0.439308 |
| H  | -0.202159 | -1.608498 | -1.657973 | H  | 5.330913  | 1.516505  | -0.886943 |
| C  | 1.264594  | -3.063046 | 1.235169  | N  | 2.952883  | -0.187705 | 0.410114  |
| H  | 1.263586  | -3.283774 | 0.151065  | Cr | 0.841553  | -0.161036 | 0.772114  |
| H  | 1.258293  | -4.056992 | 1.722201  | C  | 0.712507  | -1.182983 | -2.121296 |
| C  | 2.538816  | -2.309233 | 1.611567  | H  | -0.062994 | -0.488602 | -2.457940 |
| H  | 2.530905  | -1.316614 | 1.129626  | H  | 1.746358  | -0.914737 | -2.354718 |
| H  | 2.550410  | -2.122209 | 2.700705  | C  | 0.425677  | -2.341699 | -1.507324 |
| H  | -0.934110 | -2.949272 | 1.279473  | H  | 0.555896  | -1.540270 | 1.724194  |
| C  | 3.818066  | -3.046778 | 1.208830  | C  | -0.937335 | -2.862659 | -1.151320 |
| C  | 5.089840  | -2.278472 | 1.563468  | H  | -0.933376 | -3.083721 | -0.067638 |
| H  | 3.795740  | -3.239584 | 0.121311  | H  | -1.067954 | -3.847733 | -1.639143 |
| H  | 3.834765  | -4.039797 | 1.693150  | C  | -2.115330 | -1.950810 | -1.486610 |
| H  | 5.994577  | -2.831217 | 1.262388  | H  | -1.944886 | -0.963370 | -1.025420 |
| H  | 5.117959  | -1.299046 | 1.057584  | H  | -2.154378 | -1.776686 | -2.576954 |
| H  | 5.158089  | -2.096045 | 2.649665  | H  | 1.261020  | -2.993191 | -1.220430 |

<sup>514</sup>A

Geometry with 63 atoms:

Total energy: -2364.166386560

|   |           |           |           |
|---|-----------|-----------|-----------|
| C | -4.257422 | -0.345709 | 2.195644  |
| C | -2.901500 | -0.426033 | 1.902299  |
| C | -2.330368 | 0.653503  | 1.210623  |
| C | -3.118117 | 1.771519  | 0.832975  |
| C | -4.485019 | 1.851271  | 1.124830  |
| C | -5.035982 | 0.773181  | 1.812130  |
| H | -4.739812 | -1.164929 | 2.732990  |
| H | -2.288178 | -1.281088 | 2.190048  |
| H | -5.087742 | 2.712178  | 0.830353  |
| H | -6.099051 | 0.788896  | 2.061908  |
| N | -2.246280 | 2.632906  | 0.188476  |
| H | -2.483268 | 3.537154  | -0.207038 |
| N | -1.032825 | 0.862759  | 0.784883  |
| C | -1.016193 | 2.056776  | 0.187354  |
| C | 2.509769  | 2.005439  | -0.520865 |
| C | 2.820262  | 3.226448  | -1.131923 |
| C | 1.779530  | 4.137353  | -1.343003 |
| C | 0.473304  | 3.831298  | -0.944170 |
| C | 0.244569  | 2.588931  | -0.339344 |
| N | 1.250419  | 1.718779  | -0.155966 |
| H | 1.989014  | 5.097902  | -1.818367 |
| H | 3.842116  | 3.462373  | -1.433039 |
| H | -0.335836 | 4.546785  | -1.096223 |

<sup>515</sup>A

Geometry with 57 atoms:

Total energy: -2285.548422970

|   |           |           |          |
|---|-----------|-----------|----------|
| C | -4.936251 | -1.921189 | 1.282675 |
| C | -3.578012 | -1.702394 | 1.085685 |
| C | -3.196600 | -0.442050 | 0.598673 |
| C | -4.168391 | 0.554208  | 0.322381 |
| C | -5.536639 | 0.334329  | 0.521377 |
| C | -5.898697 | -0.919688 | 1.005413 |
| H | -5.274902 | -2.888305 | 1.661176 |
| H | -2.823944 | -2.463157 | 1.293948 |
| H | -6.280523 | 1.103976  | 0.307829 |
| H | -6.955261 | -1.138588 | 1.176646 |



|    |           |           |           |    |           |           |           |
|----|-----------|-----------|-----------|----|-----------|-----------|-----------|
| N  | -3.452842 | 1.645393  | -0.140545 | C  | -4.216131 | 0.691499  | -0.465506 |
| H  | -3.846017 | 2.537859  | -0.420067 | C  | -5.592115 | 0.455016  | -0.565600 |
| N  | -1.947961 | 0.062852  | 0.297285  | C  | -5.980822 | -0.862708 | -0.788527 |
| C  | -2.135962 | 1.310245  | -0.138573 | H  | -5.389390 | -2.926246 | -1.081665 |
| C  | 1.362784  | 2.016595  | -0.582022 | H  | -2.934191 | -2.472411 | -0.896799 |
| C  | 1.453023  | 3.307168  | -1.118908 | H  | -6.322438 | 1.260971  | -0.472210 |
| C  | 0.262499  | 4.002957  | -1.355925 | H  | -7.044407 | -1.097313 | -0.873475 |
| C  | -0.974446 | 3.418872  | -1.060419 | N  | -3.482273 | 1.842973  | -0.247053 |
| C  | -0.979772 | 2.125664  | -0.522897 | H  | -3.857621 | 2.777441  | -0.122797 |
| N  | 0.169776  | 1.467045  | -0.305446 | N  | -1.991994 | 0.193983  | -0.432583 |
| H  | 0.298162  | 5.009296  | -1.778160 | C  | -2.167375 | 1.503470  | -0.237334 |
| H  | 2.420671  | 3.755653  | -1.352955 | C  | 1.325765  | 2.315752  | 0.038215  |
| H  | -1.904843 | 3.956291  | -1.252876 | C  | 1.404506  | 3.700807  | 0.230981  |
| C  | 2.457789  | 1.095915  | -0.264632 | C  | 0.208886  | 4.425979  | 0.281559  |
| C  | 3.695660  | -2.052240 | 0.832753  | C  | -1.021726 | 3.776576  | 0.133975  |
| C  | 5.038149  | -2.401188 | 0.921411  | C  | -1.014279 | 2.387625  | -0.048958 |
| C  | 6.067288  | -1.493858 | 0.569516  | N  | 0.138510  | 1.701942  | -0.079620 |
| C  | 5.790198  | -0.206491 | 0.117896  | H  | 0.236525  | 5.507117  | 0.431924  |
| C  | 4.438028  | 0.144792  | 0.028099  | H  | 2.368093  | 4.202290  | 0.337773  |
| C  | 3.399457  | -0.757368 | 0.377590  | H  | -1.956249 | 4.340702  | 0.156561  |
| H  | 2.890582  | -2.739022 | 1.099820  | C  | 2.433019  | 1.362298  | -0.068762 |
| H  | 5.311482  | -3.399585 | 1.270424  | C  | 3.760138  | -1.907605 | -0.520638 |
| H  | 7.108140  | -1.814573 | 0.654878  | C  | 5.112087  | -2.231152 | -0.530409 |
| H  | 6.585562  | 0.490171  | -0.153136 | C  | 6.114147  | -1.247308 | -0.352724 |
| N  | 3.795994  | 1.304263  | -0.371247 | C  | 5.797559  | 0.094473  | -0.161016 |
| H  | 4.246658  | 2.155826  | -0.690222 | C  | 4.436113  | 0.419340  | -0.150922 |
| N  | 2.185467  | -0.130661 | 0.183544  | C  | 3.421430  | -0.558287 | -0.324857 |
| Cr | 0.094092  | -0.552666 | 0.382865  | H  | 2.984778  | -2.660338 | -0.662166 |
| C  | 0.120147  | -0.950199 | -2.799371 | H  | 5.412643  | -3.270406 | -0.681416 |
| H  | -0.796432 | -0.440415 | -3.110183 | H  | 7.163746  | -1.549734 | -0.368900 |
| H  | 1.053241  | -0.390726 | -2.909096 | H  | 6.570863  | 0.853086  | -0.026866 |
| C  | 0.121503  | -2.213625 | -2.349766 | N  | 3.765060  | 1.618241  | 0.008075  |
| H  | 0.023110  | -2.137115 | 0.986927  | H  | 4.191828  | 2.528972  | 0.143834  |
| C  | -1.070995 | -3.112890 | -2.180084 | N  | 2.188438  | 0.064848  | -0.266898 |
| H  | -1.079027 | -3.457179 | -1.129657 | Cr | 0.084634  | -0.428421 | -0.352002 |
| H  | -0.890579 | -4.028218 | -2.775054 | C  | 0.102548  | -2.429909 | -0.971639 |
| C  | -2.424113 | -2.510612 | -2.544130 | H  | -0.874690 | -2.914734 | -0.780638 |
| H  | -2.643595 | -1.621015 | -1.932986 | H  | 0.826381  | -2.990055 | -0.345853 |
| H  | -2.464405 | -2.211955 | -3.604588 | C  | 0.467047  | -2.581739 | -2.455471 |
| H  | -3.233625 | -3.236350 | -2.370262 | H  | 0.520704  | -3.635095 | -2.796665 |
| H  | 1.083038  | -2.663343 | -2.070263 | H  | -0.270948 | -2.083377 | -3.111378 |
| C  | 0.323959  | 0.138459  | 3.466387  | H  | 1.449305  | -2.131588 | -2.690625 |
| H  | -0.521590 | -0.529638 | 3.658375  | C  | 0.102357  | -0.292864 | 2.722120  |
| H  | 1.317785  | -0.321039 | 3.471677  | H  | -0.862573 | 0.184881  | 2.913908  |
| C  | 0.153558  | 1.446407  | 3.253008  | H  | 0.981435  | 0.357026  | 2.727620  |
| H  | 1.001129  | 2.116910  | 3.073910  | C  | 0.223073  | -1.617691 | 2.545243  |
| H  | -0.841063 | 1.905075  | 3.263154  | C  | -0.883148 | -2.635383 | 2.562626  |
|    |           |           |           | H  | -0.647227 | -3.373087 | 3.352791  |
|    |           |           |           | H  | -0.826928 | -3.209526 | 1.620355  |
|    |           |           |           | C  | -2.293604 | -2.089513 | 2.760244  |
|    |           |           |           | H  | -2.397297 | -1.573533 | 3.728808  |
|    |           |           |           | H  | -2.561548 | -1.375193 | 1.966150  |
|    |           |           |           | H  | -3.034108 | -2.903791 | 2.734532  |
|    |           |           |           | H  | 1.227892  | -2.028533 | 2.381564  |

<sup>5</sup>16A  
 Geometry with 57 atoms:  
 Total energy: -2285.582975940

|   |           |           |           |
|---|-----------|-----------|-----------|
| C | -5.033853 | -1.908162 | -0.907706 |
| C | -3.667804 | -1.671407 | -0.808241 |
| C | -3.256147 | -0.347325 | -0.584950 |

<sup>5</sup>TS[6A-16A]

Geometry with 57 atoms:

Total energy: -2285.524667480

|    |           |           |           |
|----|-----------|-----------|-----------|
| C  | -5.432688 | -1.974653 | -0.564463 |
| C  | -4.062143 | -1.754657 | -0.480911 |
| C  | -3.627499 | -0.442625 | -0.227452 |
| C  | -4.572509 | 0.605436  | -0.063650 |
| C  | -5.952893 | 0.386993  | -0.147538 |
| C  | -6.362437 | -0.920064 | -0.400410 |
| H  | -5.805622 | -2.982638 | -0.760446 |
| H  | -3.341572 | -2.565195 | -0.606384 |
| H  | -6.673452 | 1.197554  | -0.021953 |
| H  | -7.430391 | -1.138549 | -0.474222 |
| N  | -3.814034 | 1.736424  | 0.166897  |
| H  | -4.174623 | 2.673439  | 0.309162  |
| N  | -2.354579 | 0.070247  | -0.096815 |
| C  | -2.497938 | 1.364504  | 0.135459  |
| C  | 0.982945  | 2.356724  | 0.309460  |
| C  | 0.962759  | 3.726082  | 0.614291  |
| C  | -0.271719 | 4.355518  | 0.776474  |
| C  | -1.445579 | 3.616142  | 0.628903  |
| C  | -1.343712 | 2.250982  | 0.324093  |
| N  | -0.151087 | 1.644428  | 0.176839  |
| H  | -0.318702 | 5.419522  | 1.017113  |
| H  | 1.886813  | 4.295381  | 0.725745  |
| H  | -2.417914 | 4.095373  | 0.755937  |
| C  | 2.210412  | 1.580594  | 0.094547  |
| C  | 4.052128  | -1.353821 | -0.655256 |
| C  | 5.435801  | -1.438514 | -0.766507 |
| C  | 6.264353  | -0.307149 | -0.575719 |
| C  | 5.736299  | 0.945033  | -0.271475 |
| C  | 4.343192  | 1.027265  | -0.160229 |
| C  | 3.498512  | -0.100123 | -0.343153 |
| H  | 3.411305  | -2.223960 | -0.804918 |
| H  | 5.898710  | -2.398242 | -1.007482 |
| H  | 7.346758  | -0.419806 | -0.672390 |
| H  | 6.377423  | 1.817050  | -0.128143 |
| N  | 3.486525  | 2.073886  | 0.116793  |
| H  | 3.761795  | 3.035942  | 0.281042  |
| N  | 2.184771  | 0.284496  | -0.172276 |
| Cr | -0.057423 | -0.580822 | -0.212722 |
| C  | 1.230621  | -3.447095 | 1.096092  |
| H  | 2.123634  | -2.801695 | 1.081602  |
| H  | 1.262934  | -4.058436 | 0.178206  |
| C  | -0.058703 | -1.377799 | 1.840475  |
| H  | -1.007745 | -1.020407 | 2.249846  |
| H  | 0.857159  | -0.998893 | 2.307335  |
| C  | -0.013802 | -2.573229 | 1.103590  |
| H  | -0.957004 | -3.129057 | 1.005473  |
| H  | -0.039185 | -2.276565 | -0.458902 |
| C  | 1.275132  | -4.365231 | 2.322192  |
| H  | 0.396397  | -5.030540 | 2.357150  |
| H  | 2.175658  | -5.000011 | 2.304058  |

|   |           |           |           |
|---|-----------|-----------|-----------|
| H | 1.288454  | -3.779376 | 3.255128  |
| C | -0.018628 | -2.059962 | -2.056685 |
| H | -0.907596 | -2.694317 | -2.151557 |
| H | 0.930754  | -2.601439 | -2.141784 |
| C | -0.083751 | -0.715176 | -2.430065 |
| H | 0.824244  | -0.181491 | -2.725318 |
| H | -1.040173 | -0.271337 | -2.721431 |

<sup>5</sup>TS[15A-16A]

Geometry with 57 atoms:

Total energy: -2285.532499550

|   |           |           |           |
|---|-----------|-----------|-----------|
| C | 5.011851  | -2.491266 | 0.576328  |
| C | 3.657003  | -2.191811 | 0.472920  |
| C | 3.312100  | -0.919526 | -0.007215 |
| C | 4.318414  | 0.017063  | -0.360038 |
| C | 5.681216  | -0.283096 | -0.257125 |
| C | 6.006718  | -1.552770 | 0.215398  |
| H | 5.318773  | -3.471859 | 0.947210  |
| H | 2.881525  | -2.905681 | 0.756485  |
| H | 6.451224  | 0.439924  | -0.532494 |
| H | 7.058805  | -1.830528 | 0.312649  |
| N | 3.638857  | 1.150588  | -0.772459 |
| H | 4.060076  | 2.009381  | -1.110441 |
| N | 2.074570  | -0.339525 | -0.213321 |
| C | 2.305462  | 0.897007  | -0.669811 |
| C | -1.180191 | 1.760398  | -0.968833 |
| C | -1.219841 | 3.115975  | -1.302466 |
| C | -0.008066 | 3.796991  | -1.478761 |
| C | 1.208280  | 3.125382  | -1.297355 |
| C | 1.178675  | 1.769255  | -0.964864 |
| N | 0.001579  | 1.109431  | -0.830687 |
| H | -0.011585 | 4.858461  | -1.732583 |
| H | -2.173519 | 3.636820  | -1.407220 |
| H | 2.157887  | 3.654163  | -1.399142 |
| C | -2.300361 | 0.880453  | -0.673138 |
| C | -3.630229 | -2.216046 | 0.475436  |
| C | -4.982808 | -2.529841 | 0.565976  |
| C | -5.983882 | -1.604531 | 0.188797  |
| C | -5.667179 | -0.334132 | -0.287754 |
| C | -4.306739 | -0.019672 | -0.378146 |
| C | -3.294247 | -0.943050 | -0.009037 |
| H | -2.849994 | -2.919286 | 0.772214  |
| H | -5.282914 | -3.511511 | 0.939544  |
| H | -7.033854 | -1.893235 | 0.276420  |
| H | -6.441969 | 0.378840  | -0.575638 |
| N | -3.635217 | 1.118639  | -0.790712 |
| H | -4.061892 | 1.970323  | -1.139828 |
| N | -2.060276 | -0.350559 | -0.205241 |
| C | 0.029277  | -0.529222 | 2.953123  |
| H | -1.029273 | -0.793908 | 2.854293  |
| H | 0.749113  | -1.350620 | 2.900968  |
| C | 0.420169  | 0.732659  | 3.170971  |
| C | -0.490082 | 1.921057  | 3.304888  |
| H | -0.505597 | 2.232760  | 4.366570  |

|    |           |           |           |
|----|-----------|-----------|-----------|
| H  | -1.524557 | 1.628230  | 3.054414  |
| C  | -0.051198 | 3.116417  | 2.453276  |
| H  | -0.726260 | 3.976140  | 2.591820  |
| H  | 0.966439  | 3.446182  | 2.722407  |
| H  | -0.043768 | 2.861788  | 1.383192  |
| H  | 1.493940  | 0.941146  | 3.278565  |
| Cr | 0.008647  | -0.868860 | -0.259543 |
| C  | 0.006525  | -2.098348 | -2.205397 |
| H  | -0.927709 | -1.780616 | -2.678292 |
| H  | 0.940208  | -1.779771 | -2.678847 |
| C  | 0.007187  | -3.099165 | -1.250444 |
| H  | 0.007614  | -2.421536 | 0.415148  |
| H  | 0.929535  | -3.631858 | -1.001396 |
| H  | -0.914679 | -3.632223 | -1.000405 |

#### <sup>41</sup>B

Geometry with 38 atoms:

Total energy: -2049.275756130

|   |           |           |           |
|---|-----------|-----------|-----------|
| C | 2.707912  | -0.000076 | 4.973257  |
| C | 2.371639  | -0.000161 | 3.619527  |
| C | 1.011001  | -0.000026 | 3.285672  |
| C | 0.024952  | 0.000248  | 4.305554  |
| C | 0.358241  | 0.000411  | 5.662038  |
| C | 1.718018  | 0.000219  | 5.977550  |
| H | 3.760919  | -0.000243 | 5.263962  |
| H | 3.143553  | -0.000391 | 2.846696  |
| H | -0.408146 | 0.000601  | 6.439537  |
| H | 2.021990  | 0.000264  | 7.026721  |
| N | -1.193713 | 0.000215  | 3.645138  |
| H | -2.109603 | 0.000172  | 4.081009  |
| N | 0.372424  | -0.000215 | 2.054126  |
| C | -0.955065 | -0.000067 | 2.306140  |
| C | -1.874091 | -0.000109 | -1.198514 |
| C | -3.264331 | -0.000084 | -1.215926 |
| C | -3.973498 | -0.000125 | -0.000000 |
| C | -3.264331 | -0.000084 | 1.215926  |
| C | -1.874091 | -0.000109 | 1.198514  |
| N | -1.180390 | -0.000198 | -0.000000 |
| H | -5.064035 | -0.000169 | -0.000000 |
| H | -3.799631 | -0.000033 | -2.168325 |
| H | -3.799631 | -0.000033 | 2.168325  |
| C | -0.955065 | -0.000067 | -2.306140 |
| C | 2.371639  | -0.000161 | -3.619527 |
| C | 2.707912  | -0.000076 | -4.973257 |
| C | 1.718018  | 0.000219  | -5.977550 |
| C | 0.358241  | 0.000411  | -5.662038 |
| C | 0.024952  | 0.000248  | -4.305554 |
| C | 1.011001  | -0.000026 | -3.285672 |
| H | 3.143553  | -0.000391 | -2.846696 |
| H | 3.760919  | -0.000243 | -5.263962 |
| H | 2.021990  | 0.000264  | -7.026721 |
| H | -0.408146 | 0.000601  | -6.439537 |
| N | -1.193713 | 0.000215  | -3.645138 |
| H | -2.109603 | 0.000172  | -4.081009 |

|    |          |           |           |
|----|----------|-----------|-----------|
| N  | 0.372424 | -0.000215 | -2.054126 |
| Cr | 0.761181 | -0.000112 | 0.000000  |

#### <sup>42</sup>B

Geometry with 44 atoms:

Total energy: -2127.837213370

|    |           |           |           |
|----|-----------|-----------|-----------|
| C  | -4.998826 | -2.443478 | -0.024408 |
| C  | -3.641679 | -2.119967 | -0.026000 |
| C  | -3.291343 | -0.762001 | -0.025070 |
| C  | -4.306578 | 0.230221  | -0.013297 |
| C  | -5.666105 | -0.090195 | -0.010826 |
| C  | -5.995173 | -1.446368 | -0.018569 |
| H  | -5.297400 | -3.494278 | -0.027261 |
| H  | -2.883164 | -2.902936 | -0.023840 |
| H  | -6.435581 | 0.684254  | -0.003086 |
| H  | -7.047019 | -1.740951 | -0.018455 |
| N  | -3.640546 | 1.444666  | -0.005464 |
| H  | -4.071852 | 2.362652  | 0.001270  |
| N  | -2.054867 | -0.129105 | -0.029800 |
| C  | -2.303334 | 1.199004  | -0.015340 |
| C  | 1.195201  | 2.118982  | -0.007269 |
| C  | 1.215763  | 3.508499  | 0.041350  |
| C  | -0.000007 | 4.217828  | 0.063520  |
| C  | -1.215777 | 3.508500  | 0.041366  |
| C  | -1.195216 | 2.118983  | -0.007255 |
| N  | -0.000008 | 1.424960  | -0.038192 |
| H  | -0.000006 | 5.307561  | 0.105935  |
| H  | 2.168267  | 4.042910  | 0.069300  |
| H  | -2.168281 | 4.042911  | 0.069329  |
| C  | 2.303319  | 1.199004  | -0.015367 |
| C  | 3.641699  | -2.119963 | -0.025953 |
| C  | 4.998849  | -2.443456 | -0.024349 |
| C  | 5.995184  | -1.446335 | -0.018550 |
| C  | 5.666099  | -0.090168 | -0.010853 |
| C  | 4.306569  | 0.230234  | -0.013328 |
| C  | 3.291341  | -0.761999 | -0.025071 |
| H  | 2.883207  | -2.902953 | -0.023750 |
| H  | 5.297437  | -3.494253 | -0.027159 |
| H  | 7.047033  | -1.740906 | -0.018421 |
| H  | 6.435567  | 0.684291  | -0.003135 |
| N  | 3.640529  | 1.444674  | -0.005511 |
| H  | 4.071830  | 2.362663  | 0.001209  |
| N  | 2.054858  | -0.129108 | -0.029824 |
| Cr | -0.000010 | -0.531471 | -0.041336 |
| C  | 0.000047  | -2.935580 | -0.520268 |
| C  | 0.000019  | -2.855128 | 0.827654  |
| H  | -0.930092 | -3.013249 | -1.093459 |
| H  | 0.930209  | -3.013500 | -1.093385 |
| H  | 0.932653  | -2.860762 | 1.402939  |
| H  | -0.932651 | -2.860443 | 1.402882  |

#### <sup>43</sup>B

Geometry with 50 atoms:

Total energy: -2206.385660230

|    |           |           |           |
|----|-----------|-----------|-----------|
| C  | -4.952031 | -2.402465 | 0.010342  |
| C  | -3.599839 | -2.058843 | 0.005742  |
| C  | -3.272839 | -0.695947 | -0.007718 |
| C  | -4.297996 | 0.285644  | -0.011897 |
| C  | -5.652556 | -0.055966 | -0.007752 |
| C  | -5.961087 | -1.417715 | 0.002684  |
| H  | -5.237157 | -3.456939 | 0.020809  |
| H  | -2.821583 | -2.824351 | 0.015555  |
| H  | -6.434600 | 0.705833  | -0.011542 |
| H  | -7.008793 | -1.726770 | 0.006285  |
| N  | -3.643870 | 1.507460  | -0.018348 |
| H  | -4.083757 | 2.421158  | -0.019145 |
| N  | -2.045440 | -0.051644 | -0.014251 |
| C  | -2.301711 | 1.273753  | -0.017717 |
| C  | 1.194677  | 2.190802  | -0.009828 |
| C  | 1.215207  | 3.582028  | -0.014361 |
| C  | 0.000781  | 4.292184  | -0.015128 |
| C  | -1.213776 | 3.582175  | -0.016802 |
| C  | -1.193431 | 2.190972  | -0.011979 |
| N  | 0.000562  | 1.493034  | -0.000625 |
| H  | 0.000853  | 5.382801  | -0.017978 |
| H  | 2.168322  | 4.116287  | -0.019111 |
| H  | -2.166804 | 4.116574  | -0.023407 |
| C  | 2.302725  | 1.273379  | -0.014721 |
| C  | 3.599933  | -2.059591 | 0.001778  |
| C  | 4.952025  | -2.403626 | 0.006253  |
| C  | 5.961357  | -1.419153 | 0.001881  |
| C  | 5.653209  | -0.057290 | -0.005485 |
| C  | 4.298751  | 0.284717  | -0.009645 |
| C  | 3.273320  | -0.696597 | -0.007993 |
| H  | 2.821477  | -2.824916 | 0.008337  |
| H  | 5.236831  | -3.458211 | 0.013900  |
| H  | 7.008974  | -1.728512 | 0.005385  |
| H  | 6.435470  | 0.704294  | -0.007134 |
| N  | 3.644962  | 1.506720  | -0.013986 |
| H  | 4.085088  | 2.420300  | -0.013433 |
| N  | 2.046096  | -0.051975 | -0.013419 |
| Cr | 0.000494  | -0.479957 | -0.015588 |
| C  | -0.001965 | -2.455391 | -1.705614 |
| C  | 0.000377  | -1.290610 | -2.389190 |
| H  | 0.931291  | -2.972063 | -1.458186 |
| H  | -0.937349 | -2.967926 | -1.457637 |
| H  | -0.931775 | -0.819145 | -2.716877 |
| H  | 0.934392  | -0.823019 | -2.717129 |
| C  | -0.001675 | -1.090121 | 2.442039  |
| C  | -0.005683 | -2.303440 | 1.849537  |
| H  | -0.932736 | -0.592347 | 2.730857  |
| H  | 0.932480  | -0.600692 | 2.735169  |
| H  | 0.925647  | -2.840421 | 1.641273  |
| H  | -0.940938 | -2.831523 | 1.635975  |

<sup>4</sup>TS[3B-4B]

Geometry with 50 atoms:  
Total energy: -2206.365309560

|    |           |           |           |
|----|-----------|-----------|-----------|
| C  | 4.968732  | -2.324722 | -0.253992 |
| C  | 3.614239  | -2.007645 | -0.220479 |
| C  | 3.268390  | -0.648852 | -0.153858 |
| C  | 4.279665  | 0.347430  | -0.129906 |
| C  | 5.641676  | 0.029814  | -0.164294 |
| C  | 5.966067  | -1.323156 | -0.225161 |
| H  | 5.271788  | -3.372802 | -0.306561 |
| H  | 2.847974  | -2.781210 | -0.249329 |
| H  | 6.411770  | 0.803228  | -0.144907 |
| H  | 7.017397  | -1.618356 | -0.253739 |
| N  | 3.608959  | 1.556415  | -0.073068 |
| H  | 4.035782  | 2.476672  | -0.047882 |
| N  | 2.034729  | -0.021983 | -0.110222 |
| C  | 2.276483  | 1.293010  | -0.064410 |
| C  | -1.208416 | 2.192400  | -0.014312 |
| C  | -1.250663 | 3.588163  | -0.011024 |
| C  | -0.043109 | 4.297662  | -0.009748 |
| C  | 1.174741  | 3.605486  | -0.022376 |
| C  | 1.151351  | 2.209787  | -0.024469 |
| N  | -0.024146 | 1.527232  | -0.005252 |
| H  | -0.051096 | 5.389012  | -0.008063 |
| H  | -2.206541 | 4.114972  | -0.015686 |
| H  | 2.123893  | 4.144770  | -0.034717 |
| C  | -2.320751 | 1.260426  | -0.048825 |
| C  | -3.639251 | -2.046603 | -0.223201 |
| C  | -4.991590 | -2.372489 | -0.246892 |
| C  | -5.995030 | -1.378158 | -0.197423 |
| C  | -5.677486 | -0.024294 | -0.126027 |
| C  | -4.317080 | 0.301037  | -0.101707 |
| C  | -3.298188 | -0.687330 | -0.144466 |
| H  | -2.870234 | -2.816354 | -0.270027 |
| H  | -5.287592 | -3.422119 | -0.308291 |
| H  | -7.044753 | -1.679640 | -0.218738 |
| H  | -6.451389 | 0.744783  | -0.091823 |
| N  | -3.655412 | 1.513801  | -0.041565 |
| H  | -4.088743 | 2.430543  | -0.004633 |
| N  | -2.067135 | -0.052545 | -0.107717 |
| H  | -0.207861 | -2.913650 | 2.116502  |
| H  | 1.446967  | -2.327206 | 1.712177  |
| H  | -0.967460 | -0.607127 | 2.488365  |
| H  | 0.807679  | -0.149060 | 2.498022  |
| C  | 0.373472  | -2.119973 | 1.635285  |
| C  | 0.019510  | -0.750712 | 2.031624  |
| Cr | -0.006597 | -0.465396 | 0.011273  |
| C  | 0.034713  | -1.992055 | -1.339963 |
| C  | 0.003398  | -2.794461 | -0.103533 |
| H  | -0.873867 | -2.000050 | -1.954166 |
| H  | 0.959421  | -2.027003 | -1.928496 |
| H  | 0.789972  | -3.552996 | -0.024415 |
| H  | -0.968978 | -3.255932 | 0.095547  |

<sup>4</sup>4B

Geometry with 50 atoms:  
Total energy: -2206.399872380

|    |           |           |           |
|----|-----------|-----------|-----------|
| C  | -5.035170 | -2.249444 | -0.430060 |
| C  | -3.679340 | -1.943784 | -0.415096 |
| C  | -3.325028 | -0.591334 | -0.280396 |
| C  | -4.328854 | 0.405409  | -0.161754 |
| C  | -5.694367 | 0.098986  | -0.179326 |
| C  | -6.026479 | -1.245536 | -0.315581 |
| H  | -5.347251 | -3.291292 | -0.531414 |
| H  | -2.913191 | -2.713792 | -0.497999 |
| H  | -6.458727 | 0.872914  | -0.088610 |
| H  | -7.079683 | -1.534978 | -0.332896 |
| N  | -3.644901 | 1.601322  | -0.033318 |
| H  | -4.062500 | 2.520594  | 0.071755  |
| N  | -2.086158 | 0.021021  | -0.223251 |
| C  | -2.317617 | 1.327939  | -0.072483 |
| C  | 1.145721  | 2.267900  | 0.026822  |
| C  | 1.189682  | 3.657113  | 0.202143  |
| C  | -0.026782 | 4.342402  | 0.300209  |
| C  | -1.242726 | 3.653351  | 0.218082  |
| C  | -1.196190 | 2.264980  | 0.042367  |
| N  | -0.024451 | 1.622869  | -0.037853 |
| H  | -0.027466 | 5.425207  | 0.441131  |
| H  | 2.140121  | 4.191035  | 0.259102  |
| H  | -2.194574 | 4.183080  | 0.288179  |
| C  | 2.270810  | 1.337122  | -0.100783 |
| C  | 3.679548  | -1.915617 | -0.446464 |
| C  | 5.039844  | -2.200712 | -0.463363 |
| C  | 6.016560  | -1.182680 | -0.350806 |
| C  | 5.663305  | 0.156215  | -0.216033 |
| C  | 4.293180  | 0.441411  | -0.197103 |
| C  | 3.301843  | -0.568713 | -0.311685 |
| H  | 2.929580  | -2.701240 | -0.528847 |
| H  | 5.366656  | -3.238053 | -0.564371 |
| H  | 7.073997  | -1.456175 | -0.368494 |
| H  | 6.415058  | 0.942597  | -0.126779 |
| N  | 3.594709  | 1.627718  | -0.068064 |
| H  | 4.000671  | 2.552078  | 0.037500  |
| N  | 2.053494  | 0.026991  | -0.249318 |
| H  | 0.193500  | -4.322873 | 0.703074  |
| H  | -1.240311 | -3.345556 | 1.025548  |
| H  | 0.917636  | -2.782688 | -1.097612 |
| H  | -0.833028 | -2.853915 | -1.334724 |
| C  | -0.174671 | -3.278959 | 0.736422  |
| C  | -0.050897 | -2.551108 | -0.612860 |
| Cr | -0.025163 | -0.519052 | -0.220335 |
| C  | 0.052391  | -1.026477 | 1.769957  |
| C  | 0.562132  | -2.467492 | 1.812086  |
| H  | 0.674546  | -0.315196 | 2.339909  |
| H  | -0.989553 | -0.955639 | 2.129459  |
| H  | 0.440421  | -2.918298 | 2.817201  |
| H  | 1.647786  | -2.485837 | 1.603807  |

<sup>45</sup>B

Geometry with 56 atoms:  
Total energy: -2284.950074190

|    |           |           |           |
|----|-----------|-----------|-----------|
| C  | 5.036302  | -2.234906 | 0.223241  |
| C  | 3.679463  | -1.932992 | 0.208076  |
| C  | 3.321120  | -0.579479 | 0.093620  |
| C  | 4.322218  | 0.422801  | -0.005236 |
| C  | 5.688454  | 0.119490  | 0.011244  |
| C  | 6.024489  | -1.226140 | 0.127590  |
| H  | 5.351383  | -3.277256 | 0.308988  |
| H  | 2.915607  | -2.706642 | 0.275464  |
| H  | 6.451086  | 0.896776  | -0.064365 |
| H  | 7.078621  | -1.512304 | 0.143772  |
| N  | 3.634955  | 1.618541  | -0.111101 |
| H  | 4.049202  | 2.540823  | -0.199515 |
| N  | 2.080749  | 0.029354  | 0.050566  |
| C  | 2.306866  | 1.338916  | -0.075983 |
| C  | -1.160006 | 2.270319  | -0.141424 |
| C  | -1.206185 | 3.658237  | -0.328201 |
| C  | 0.007748  | 4.346646  | -0.430859 |
| C  | 1.224234  | 3.658658  | -0.352956 |
| C  | 1.181682  | 2.271461  | -0.165687 |
| N  | 0.011583  | 1.627637  | -0.060634 |
| H  | 0.005965  | 5.428306  | -0.579985 |
| H  | -2.158314 | 4.188096  | -0.395145 |
| H  | 2.175453  | 4.187396  | -0.439568 |
| C  | -2.285598 | 1.339859  | -0.034588 |
| C  | -3.692571 | -1.918670 | 0.246160  |
| C  | -5.052345 | -2.206958 | 0.250956  |
| C  | -6.029890 | -1.188732 | 0.147759  |
| C  | -5.678543 | 0.153028  | 0.036025  |
| C  | -4.309001 | 0.441786  | 0.029675  |
| C  | -3.317148 | -0.569388 | 0.132773  |
| H  | -2.940268 | -2.703168 | 0.321247  |
| H  | -5.378046 | -3.246227 | 0.334102  |
| H  | -7.086943 | -1.464248 | 0.154245  |
| H  | -6.431771 | 0.938884  | -0.045258 |
| N  | -3.611188 | 1.630810  | -0.072380 |
| H  | -4.017034 | 2.556347  | -0.165384 |
| N  | -2.069749 | 0.027900  | 0.091920  |
| H  | 0.001262  | -4.138688 | -1.486750 |
| H  | 1.363745  | -3.018679 | -1.596187 |
| H  | -0.916767 | -2.917610 | 0.469131  |
| H  | 0.815169  | -2.989934 | 0.810778  |
| C  | 0.289048  | -3.079013 | -1.339285 |
| C  | 0.071428  | -2.586280 | 0.097763  |
| Cr | 0.012271  | -0.508492 | 0.061763  |
| C  | -0.061769 | -0.711348 | -1.997699 |
| C  | -0.485832 | -2.153123 | -2.284338 |
| H  | -0.727658 | 0.039979  | -2.457115 |
| H  | 0.967164  | -0.527477 | -2.355532 |
| H  | -0.332125 | -2.430612 | -3.346398 |
| H  | -1.569622 | -2.269653 | -2.094339 |
| C  | 0.606541  | -0.135875 | 2.791153  |
| H  | 1.576751  | -0.640202 | 2.768710  |
| H  | 0.618076  | 0.957565  | 2.845082  |
| C  | -0.541587 | -0.827808 | 2.814916  |

H -1.512738 -0.329126 2.885320  
H -0.551853 -1.921156 2.809610

<sup>4</sup>Ts[5B-6B]

Geometry with 56 atoms:

Total energy: -2284.913482980

C 5.066358 -2.252654 -0.341313  
C 3.710840 -1.947465 -0.289635  
C 3.348547 -0.593778 -0.184430  
C 4.356962 0.406925 -0.150172  
C 5.721698 0.102026 -0.201715  
C 6.057441 -1.245076 -0.294373  
H 5.375807 -3.297023 -0.422762  
H 2.956733 -2.732075 -0.336131  
H 6.484167 0.882640 -0.172515  
H 7.110723 -1.531571 -0.336627  
N 3.682981 1.609562 -0.068094  
H 4.104810 2.531907 -0.038296  
N 2.111108 0.025976 -0.113941  
C 2.351912 1.338615 -0.054470  
C -1.110182 2.301538 0.023644  
C -1.129572 3.693449 0.157269  
C 0.091115 4.374144 0.215770  
C 1.293974 3.663757 0.148426  
C 1.239134 2.272521 0.013624  
N 0.056158 1.628164 -0.054572  
H 0.104897 5.460309 0.323028  
H -2.075866 4.234529 0.215799  
H 2.253693 4.180548 0.204306  
C -2.248435 1.397618 -0.040598  
C -3.694876 -1.851264 -0.280731  
C -5.057659 -2.118030 -0.353204  
C -6.020700 -1.082741 -0.327440  
C -5.648995 0.254795 -0.233681  
C -4.277074 0.521811 -0.162628  
C -3.296909 -0.506843 -0.178558  
H -2.961790 -2.655881 -0.302231  
H -5.395356 -3.153768 -0.432436  
H -7.080832 -1.339721 -0.385452  
H -6.389924 1.056311 -0.218686  
N -3.570884 1.705807 -0.075327  
H -3.968091 2.639186 -0.054743  
N -2.043965 0.078461 -0.091668  
C -0.689735 -2.679872 1.572464  
C 0.045751 -1.770655 2.561383  
C 0.029869 -0.323617 2.081759  
H -1.739162 -2.355952 1.487688  
H 1.087049 -2.131469 2.653702  
H -0.909487 0.179721 2.370525  
H -0.731915 -3.715923 1.959896  
H -0.403177 -1.887937 3.567053  
H 0.869138 0.268086 2.484712  
Cr 0.028385 -0.394484 -0.050400  
C 0.015963 -2.734549 0.194794

H -0.212347 -3.709624 -0.244890  
H 1.105828 -2.725169 0.344930  
C -0.276845 -2.117704 -1.690533  
H -1.294115 -2.505971 -1.797303  
H 0.475923 -2.847701 -2.004032  
C -0.059622 -0.760975 -2.130924  
H 0.903474 -0.539727 -2.603044  
H -0.912952 -0.223757 -2.556046

<sup>4</sup>6B

Geometry with 56 atoms:

Total energy: -2284.978124120

C 5.055499 -1.750476 -0.833813  
C 3.689045 -1.520487 -0.723638  
C 3.271998 -0.203109 -0.471497  
C 4.231234 0.834132 -0.333805  
C 5.607417 0.605406 -0.446018  
C 6.000212 -0.705370 -0.698462  
H 5.412460 -2.764288 -1.028492  
H 2.962168 -2.324848 -0.822985  
H 6.334261 1.412828 -0.339423  
H 7.064082 -0.934601 -0.793419  
N 3.497381 1.979992 -0.089357  
H 3.872289 2.912360 0.053106  
N 2.007056 0.336310 -0.308572  
C 2.184499 1.641275 -0.084146  
C -1.303663 2.455317 0.160950  
C -1.388021 3.833500 0.395016  
C -0.192459 4.554270 0.491677  
C 1.041598 3.910003 0.349247  
C 1.034637 2.527777 0.118565  
N -0.116325 1.850916 0.043935  
H -0.222852 5.630384 0.674669  
H -2.352678 4.334195 0.495543  
H 1.975412 4.471986 0.414380  
C -2.403663 1.501446 -0.006443  
C -3.719720 -1.741677 -0.653572  
C -5.071292 -2.061051 -0.712400  
C -6.076753 -1.086146 -0.509260  
C -5.762363 0.242844 -0.242114  
C -4.401103 0.562802 -0.182938  
C -3.381996 -0.405730 -0.381011  
H -2.946585 -2.491754 -0.810307  
H -5.367789 -3.091500 -0.920830  
H -7.125970 -1.385209 -0.564802  
H -6.536799 0.996352 -0.087776  
N -3.735267 1.752429 0.050129  
H -4.166000 2.654033 0.228437  
N -2.150677 0.215018 -0.260425  
Cr -0.058181 -0.299991 -0.251793  
C -0.044753 -0.797943 1.721964  
C 1.026079 -1.780837 2.195086  
C 0.688140 -3.272171 2.059530  
C 0.711152 -3.902712 0.659854

|   |           |           |           |
|---|-----------|-----------|-----------|
| C | -0.071092 | -2.161819 | -1.109105 |
| C | -0.369252 | -3.452507 | -0.338091 |
| H | -1.060618 | -1.168010 | 1.947801  |
| H | 1.991937  | -1.579635 | 1.696399  |
| H | -0.304569 | -3.452316 | 2.514084  |
| H | 1.710038  | -3.759040 | 0.208294  |
| H | 0.890578  | -2.269545 | -1.650609 |
| H | 0.072500  | 0.181406  | 2.222219  |
| H | 1.219219  | -1.589951 | 3.269196  |
| H | 1.405683  | -3.834008 | 2.683612  |
| H | 0.610826  | -4.993099 | 0.800534  |
| H | -0.839255 | -2.014383 | -1.900105 |
| H | -0.523650 | -4.278882 | -1.059761 |
| H | -1.325797 | -3.365759 | 0.209853  |

#### <sup>4</sup>TS[6B-11B]

Geometry with 56 atoms:

Total energy: -2284.940365660

|   |           |           |           |
|---|-----------|-----------|-----------|
| C | 5.087035  | -1.932915 | -0.155057 |
| C | 3.721025  | -1.666238 | -0.151354 |
| C | 3.310839  | -0.324343 | -0.132294 |
| C | 4.288649  | 0.705512  | -0.109853 |
| C | 5.662668  | 0.443523  | -0.115409 |
| C | 6.044876  | -0.895125 | -0.139283 |
| H | 5.427547  | -2.970616 | -0.170739 |
| H | 2.992731  | -2.472935 | -0.164671 |
| H | 6.398292  | 1.249975  | -0.100207 |
| H | 7.107518  | -1.148208 | -0.144335 |
| N | 3.577964  | 1.889074  | -0.080806 |
| H | 3.972651  | 2.823542  | -0.056892 |
| N | 2.048276  | 0.258053  | -0.121673 |
| C | 2.255196  | 1.582231  | -0.086918 |
| C | -1.229411 | 2.477439  | -0.015688 |
| C | -1.269341 | 3.871578  | 0.011106  |
| C | -0.061138 | 4.581586  | 0.009406  |
| C | 1.153416  | 3.884410  | -0.022738 |
| C | 1.126891  | 2.488832  | -0.045751 |
| N | -0.045676 | 1.801663  | -0.033808 |
| H | -0.066657 | 5.672640  | 0.028086  |
| H | -2.225227 | 4.398507  | 0.027863  |
| H | 2.103298  | 4.422356  | -0.031518 |
| C | -2.344095 | 1.551678  | -0.044015 |
| C | -3.658131 | -1.761684 | -0.219310 |
| C | -5.010987 | -2.089633 | -0.233788 |
| C | -6.015052 | -1.097555 | -0.173850 |
| C | -5.698078 | 0.256930  | -0.101164 |
| C | -4.338443 | 0.584412  | -0.085599 |
| C | -3.318670 | -0.401913 | -0.137714 |
| H | -2.888154 | -2.530308 | -0.273012 |
| H | -5.305676 | -3.139629 | -0.295526 |
| H | -7.064596 | -1.399965 | -0.187556 |
| H | -6.472629 | 1.025015  | -0.059305 |
| N | -3.679081 | 1.799945  | -0.026753 |
| H | -4.114578 | 2.715525  | 0.012295  |

|    |           |           |           |
|----|-----------|-----------|-----------|
| N  | -2.088243 | 0.238169  | -0.105822 |
| Cr | -0.047384 | -0.202041 | 0.007803  |
| H  | -1.474792 | -2.097572 | 1.539535  |
| H  | -0.422505 | -1.789967 | 0.004981  |
| H  | 1.064620  | -0.597766 | 2.420151  |
| H  | -0.689023 | -0.074330 | 2.627359  |
| C  | -0.406454 | -1.874912 | 1.411000  |
| C  | 0.036014  | -0.652542 | 2.045152  |
| C  | -0.150148 | -1.870201 | -1.470405 |
| C  | 0.443455  | -3.144986 | 1.326693  |
| C  | 0.134010  | -3.966690 | 0.058655  |
| C  | 0.496991  | -3.256226 | -1.264548 |
| H  | -1.187611 | -1.959795 | -1.828819 |
| H  | 0.410187  | -1.286969 | -2.220304 |
| H  | 1.512039  | -2.878014 | 1.359853  |
| H  | 0.254197  | -3.759252 | 2.223644  |
| H  | 0.669506  | -4.928789 | 0.105322  |
| H  | -0.943042 | -4.220176 | 0.057773  |
| H  | 1.591695  | -3.152872 | -1.316704 |
| H  | 0.228052  | -3.918753 | -2.106156 |

#### <sup>4</sup>7B

Geometry with 62 atoms:

Total energy: -2363.525890600

|   |           |           |           |
|---|-----------|-----------|-----------|
| C | 5.051171  | -1.770752 | -0.712444 |
| C | 3.685302  | -1.539327 | -0.598105 |
| C | 3.274377  | -0.233813 | -0.282730 |
| C | 4.236726  | 0.791968  | -0.090359 |
| C | 5.612300  | 0.561133  | -0.205967 |
| C | 5.999764  | -0.738011 | -0.520323 |
| H | 5.404795  | -2.775369 | -0.955000 |
| H | 2.953246  | -2.332782 | -0.740979 |
| H | 6.342809  | 1.358311  | -0.056369 |
| H | 7.063078  | -0.967718 | -0.620367 |
| N | 3.505829  | 1.928609  | 0.202987  |
| H | 3.884680  | 2.850788  | 0.392855  |
| N | 2.011210  | 0.301974  | -0.104216 |
| C | 2.190504  | 1.593182  | 0.184734  |
| C | -1.298044 | 2.398454  | 0.451664  |
| C | -1.381285 | 3.763071  | 0.755463  |
| C | -0.185343 | 4.477319  | 0.889873  |
| C | 1.047523  | 3.837667  | 0.721074  |
| C | 1.039860  | 2.470022  | 0.416416  |
| N | -0.111565 | 1.801609  | 0.292849  |
| H | -0.214651 | 5.542693  | 1.127566  |
| H | -2.345866 | 4.257829  | 0.882615  |
| H | 1.983035  | 4.390022  | 0.826071  |
| C | -2.399502 | 1.453722  | 0.252018  |
| C | -3.717282 | -1.754501 | -0.547191 |
| C | -5.068942 | -2.073022 | -0.609544 |
| C | -6.073825 | -1.112233 | -0.345131 |
| C | -5.759130 | 0.201478  | -0.010643 |
| C | -4.397924 | 0.521248  | 0.051095  |
| C | -3.379302 | -0.433523 | -0.208903 |

|    |           |           |           |
|----|-----------|-----------|-----------|
| H  | -2.943847 | -2.493483 | -0.748620 |
| H  | -5.366027 | -3.091790 | -0.868457 |
| H  | -7.123070 | -1.410213 | -0.405848 |
| H  | -6.533328 | 0.943583  | 0.192276  |
| N  | -3.731603 | 1.698611  | 0.338381  |
| H  | -4.162199 | 2.586866  | 0.573996  |
| N  | -2.148243 | 0.183321  | -0.072077 |
| Cr | -0.058599 | -0.326376 | -0.111494 |
| C  | -0.058068 | -0.842107 | 1.867304  |
| C  | 1.024613  | -1.804598 | 2.361908  |
| C  | 0.697397  | -3.300088 | 2.258822  |
| C  | 0.684061  | -3.943149 | 0.865859  |
| C  | -0.101434 | -2.222421 | -0.918288 |
| C  | -0.413910 | -3.486185 | -0.110204 |
| H  | -1.067523 | -1.238691 | 2.076841  |
| H  | 1.987273  | -1.609286 | 1.854687  |
| H  | -0.281288 | -3.481211 | 2.742650  |
| H  | 1.673292  | -3.808418 | 0.390172  |
| H  | 0.855852  | -2.363008 | -1.458963 |
| H  | 0.025941  | 0.130994  | 2.386061  |
| H  | 1.221079  | -1.590778 | 3.430931  |
| H  | 1.436503  | -3.849026 | 2.869510  |
| H  | 0.578862  | -5.031813 | 1.016640  |
| H  | -0.866315 | -2.092706 | -1.712801 |
| H  | -0.608692 | -4.323693 | -0.809326 |
| H  | -1.354005 | -3.362290 | 0.458597  |
| C  | 0.593476  | 0.248065  | -3.226891 |
| H  | 1.564056  | 0.752759  | -3.194314 |
| H  | 0.607785  | -0.826272 | -3.430849 |
| C  | -0.552664 | 0.913853  | -3.051744 |
| H  | -1.523131 | 0.411206  | -3.110030 |
| H  | -0.567878 | 1.992954  | -2.865749 |

#### <sup>4</sup>TS[7B-8B]

Geometry with 62 atoms:

Total energy: -2363.486297180

|   |           |           |           |
|---|-----------|-----------|-----------|
| C | 5.101463  | -1.931015 | -0.841325 |
| C | 3.742503  | -1.666166 | -0.711023 |
| C | 3.359173  | -0.345576 | -0.418214 |
| C | 4.351527  | 0.660521  | -0.268265 |
| C | 5.719282  | 0.395376  | -0.398085 |
| C | 6.075839  | -0.918288 | -0.686596 |
| H | 5.426387  | -2.948605 | -1.069637 |
| H | 3.003295  | -2.455422 | -0.832809 |
| H | 6.467676  | 1.181296  | -0.280673 |
| H | 7.132140  | -1.173440 | -0.798076 |
| N | 3.660584  | 1.826552  | -0.001884 |
| H | 4.069955  | 2.743763  | 0.142639  |
| N | 2.112962  | 0.236079  | -0.238047 |
| C | 2.335175  | 1.531429  | -0.000148 |
| C | -1.126239 | 2.433393  | 0.310916  |
| C | -1.148778 | 3.789272  | 0.655689  |
| C | 0.067582  | 4.469271  | 0.766362  |
| C | 1.268814  | 3.787931  | 0.549629  |

|    |           |           |           |
|----|-----------|-----------|-----------|
| C  | 1.213269  | 2.429775  | 0.219781  |
| N  | 0.034361  | 1.791407  | 0.084725  |
| H  | 0.079863  | 5.528292  | 1.030641  |
| H  | -2.095866 | 4.300499  | 0.835838  |
| H  | 2.228094  | 4.299275  | 0.644496  |
| C  | -2.271361 | 1.555347  | 0.124428  |
| C  | -3.784511 | -1.518914 | -0.840625 |
| C  | -5.151075 | -1.726748 | -0.991692 |
| C  | -6.093292 | -0.705837 | -0.728108 |
| C  | -5.693793 | 0.563308  | -0.321800 |
| C  | -4.317629 | 0.771746  | -0.176878 |
| C  | -3.357744 | -0.250673 | -0.408662 |
| H  | -3.069371 | -2.308223 | -1.061794 |
| H  | -5.507964 | -2.702912 | -1.327720 |
| H  | -7.157515 | -0.915955 | -0.857222 |
| H  | -6.415130 | 1.360804  | -0.134034 |
| N  | -3.587074 | 1.893800  | 0.158593  |
| H  | -3.961966 | 2.816253  | 0.353965  |
| N  | -2.090977 | 0.270228  | -0.186587 |
| C  | -0.875846 | -3.066313 | 0.311632  |
| C  | -0.430860 | -3.769963 | 1.606165  |
| C  | -0.266378 | -2.831581 | 2.811319  |
| C  | 0.114768  | -0.385369 | 1.941196  |
| C  | 0.673742  | -1.618439 | 2.672224  |
| H  | -1.621129 | -2.307680 | 0.591851  |
| H  | 0.511509  | -4.317088 | 1.420469  |
| H  | -1.265774 | -2.458114 | 3.103906  |
| H  | -0.919468 | -0.192770 | 2.283871  |
| H  | -1.400163 | -3.776450 | -0.349684 |
| H  | -1.177767 | -4.537908 | 1.873927  |
| H  | 0.081295  | -3.445409 | 3.660724  |
| H  | 0.707452  | 0.494668  | 2.249754  |
| H  | 0.944773  | -1.313020 | 3.701501  |
| H  | 1.632684  | -1.947346 | 2.224274  |
| Cr | 0.043097  | -0.239601 | -0.213333 |
| C  | 0.308027  | -2.462532 | -0.448435 |
| H  | 0.743553  | -3.220736 | -1.105716 |
| H  | 1.124289  | -2.184101 | 0.232410  |
| C  | 0.031966  | -1.456034 | -2.295610 |
| H  | -0.855765 | -2.063425 | -2.500524 |
| H  | 0.956857  | -1.905214 | -2.664479 |
| C  | -0.072362 | -0.042244 | -2.374863 |
| H  | 0.799738  | 0.518244  | -2.723381 |
| H  | -1.044558 | 0.404634  | -2.596180 |

#### <sup>4</sup>8B

Geometry with 62 atoms:

Total energy: -2363.550451590

|   |          |           |           |
|---|----------|-----------|-----------|
| C | 5.115254 | -1.671622 | -0.643612 |
| C | 3.752716 | -1.399747 | -0.599990 |
| C | 3.364773 | -0.066907 | -0.383008 |
| C | 4.348603 | 0.942607  | -0.211645 |
| C | 5.720784 | 0.671241  | -0.258314 |
| C | 6.084367 | -0.653869 | -0.477817 |



|    |           |           |           |                         |                 |           |           |
|----|-----------|-----------|-----------|-------------------------|-----------------|-----------|-----------|
| H  | 5.449155  | -2.698431 | -0.808904 | H                       | -0.567631       | -4.728146 | 1.830414  |
| H  | 3.010048  | -2.185246 | -0.723570 | H                       | 0.288729        | -3.667389 | 2.941099  |
| H  | 6.466413  | 1.457455  | -0.126556 |                         |                 |           |           |
| H  | 7.143936  | -0.916169 | -0.521167 |                         |                 |           |           |
| N  | 3.640794  | 2.112332  | -0.005340 | <sup>4</sup> TS[8B-12B] |                 |           |           |
| H  | 4.038380  | 3.031857  | 0.157301  | Geometry with 62 atoms: |                 |           |           |
| N  | 2.111803  | 0.513847  | -0.281214 | Total energy:           | -2363.518217640 |           |           |
| C  | 2.319294  | 1.812416  | -0.051648 | C                       | 5.069866        | -1.670684 | -0.352796 |
| C  | -1.150356 | 2.706625  | 0.145065  | C                       | 3.705038        | -1.400602 | -0.310847 |
| C  | -1.206249 | 4.087771  | 0.372020  | C                       | 3.303966        | -0.060161 | -0.189756 |
| C  | 0.004512  | 4.781998  | 0.475406  | C                       | 4.285912        | 0.964516  | -0.135311 |
| C  | 1.224598  | 4.108672  | 0.346510  | C                       | 5.658157        | 0.697081  | -0.175747 |
| C  | 1.188010  | 2.725684  | 0.125929  | C                       | 6.032795        | -0.639775 | -0.282178 |
| N  | 0.022959  | 2.074087  | 0.045297  | H                       | 5.405542        | -2.705950 | -0.445596 |
| H  | -0.002879 | 5.859758  | 0.650776  | H                       | 2.974319        | -2.203804 | -0.375026 |
| H  | -2.160840 | 4.610615  | 0.457946  | H                       | 6.398350        | 1.498128  | -0.129096 |
| H  | 2.171609  | 4.648369  | 0.410320  | H                       | 7.093990        | -0.896508 | -0.317191 |
| C  | -2.269480 | 1.781173  | -0.044572 | N                       | 3.580872        | 2.150017  | -0.049235 |
| C  | -3.670313 | -1.395346 | -0.823605 | H                       | 3.980623        | 3.081627  | -0.006887 |
| C  | -5.029117 | -1.669767 | -0.925181 | N                       | 2.046608        | 0.527741  | -0.123527 |
| C  | -6.008535 | -0.671950 | -0.706624 | C                       | 2.256888        | 1.849443  | -0.051539 |
| C  | -5.659071 | 0.636412  | -0.386553 | C                       | -1.231592       | 2.725644  | -0.046402 |
| C  | -4.290227 | 0.909875  | -0.286089 | C                       | -1.280836       | 4.120129  | -0.014825 |
| C  | -3.297258 | -0.083619 | -0.490571 | C                       | -0.077599       | 4.836788  | 0.026500  |
| H  | -2.916712 | -2.159530 | -1.003714 | C                       | 1.141668        | 4.147297  | 0.027661  |
| H  | -5.351836 | -2.681062 | -1.182496 | C                       | 1.123987        | 2.752012  | -0.011264 |
| H  | -7.064970 | -0.935111 | -0.796372 | N                       | -0.045509       | 2.059208  | -0.037254 |
| H  | -6.412301 | 1.409676  | -0.225188 | H                       | -0.090492       | 5.927591  | 0.054135  |
| N  | -3.593111 | 2.071023  | -0.008144 | H                       | -2.239359       | 4.642205  | -0.022374 |
| H  | -3.999033 | 2.981798  | 0.181320  | H                       | 2.088615        | 4.690137  | 0.054048  |
| N  | -2.049288 | 0.492412  | -0.320775 | C                       | -2.340958       | 1.792969  | -0.081813 |
| Cr | 0.034604  | -0.072554 | -0.280361 | C                       | -3.666957       | -1.515496 | -0.071422 |
| C  | 0.107721  | -0.470110 | 1.741896  | C                       | -5.019950       | -1.840934 | -0.061418 |
| C  | -1.003087 | -1.289084 | 2.395137  | C                       | -6.021482       | -0.844343 | -0.063089 |
| C  | -1.283336 | -2.692324 | 1.838922  | C                       | -5.700215       | 0.510880  | -0.069255 |
| C  | 0.717674  | -4.045213 | -0.533672 | C                       | -4.339325       | 0.834375  | -0.076609 |
| C  | 0.131122  | -1.716354 | -1.525689 | C                       | -3.322522       | -0.156036 | -0.084255 |
| C  | -0.251728 | -3.190941 | -1.367445 | H                       | -2.898527       | -2.284691 | -0.065287 |
| H  | 0.147717  | 0.535430  | 2.199528  | H                       | -5.316328       | -2.892168 | -0.051339 |
| H  | -0.773123 | -1.389941 | 3.476384  | H                       | -7.071937       | -1.143895 | -0.056381 |
| H  | -1.636565 | -2.604998 | 0.803745  | H                       | -6.472255       | 1.282631  | -0.065676 |
| H  | 1.678966  | -4.093448 | -1.079914 | N                       | -3.675232       | 2.047402  | -0.074504 |
| H  | 1.156441  | -1.649479 | -1.941810 | H                       | -4.106440       | 2.965848  | -0.065683 |
| H  | 1.099001  | -0.926018 | 1.894795  | N                       | -2.088157       | 0.476794  | -0.095348 |
| H  | -1.947399 | -0.716821 | 2.353491  | H                       | -0.118692       | -1.597039 | -0.021825 |
| H  | -2.137910 | -3.101449 | 2.406270  | H                       | -1.206250       | -1.980406 | 1.570190  |
| H  | 0.340712  | -5.084414 | -0.517214 | H                       | -0.939379       | 0.247871  | 2.508300  |
| H  | -0.529419 | -1.252777 | -2.297360 | H                       | 0.890285        | 0.045164  | 2.529515  |
| H  | -0.312344 | -3.664076 | -2.367188 | C                       | -0.191280       | -1.563072 | 1.514474  |
| H  | -1.269030 | -3.286130 | -0.954874 | C                       | -0.061831       | -0.226215 | 2.056765  |
| C  | 1.018534  | -3.608886 | 0.908069  | Cr                      | -0.027726       | 0.054635  | 0.016684  |
| C  | -0.135826 | -3.714509 | 1.921154  | C                       | -0.748388       | -3.858224 | -0.859175 |
| H  | 1.431304  | -2.590880 | 0.902489  | C                       | 0.903045        | -2.589393 | 1.815538  |
| H  | 1.836725  | -4.253431 | 1.275908  | C                       | 0.707975        | -4.022702 | 1.297235  |
|    |           |           |           | C                       | 0.609901        | -4.246331 | -0.223014 |

|   |           |           |           |
|---|-----------|-----------|-----------|
| H | -1.448096 | -3.591152 | -0.050423 |
| H | -1.199441 | -4.744663 | -1.334170 |
| H | 1.870695  | -2.192051 | 1.472019  |
| H | 0.991114  | -2.648350 | 2.914915  |
| H | 1.555997  | -4.615984 | 1.680398  |
| H | -0.191921 | -4.455254 | 1.772331  |
| H | 1.438109  | -3.722701 | -0.729942 |
| H | 0.796318  | -5.315793 | -0.410482 |
| H | 1.151165  | -1.648408 | -1.649096 |
| H | -0.183207 | -0.666310 | -2.259954 |
| H | -0.308591 | -3.133413 | -2.850297 |
| H | -1.766159 | -2.455137 | -2.141009 |
| C | 0.070881  | -1.470163 | -1.544398 |
| C | -0.724261 | -2.731488 | -1.907967 |

<sup>4</sup>9B

Geometry with 68 atoms:

Total energy: -2442.097765770

|   |           |           |           |
|---|-----------|-----------|-----------|
| C | 5.049507  | 1.857073  | 1.059423  |
| C | 3.706816  | 1.509093  | 0.967082  |
| C | 3.401819  | 0.245248  | 0.433568  |
| C | 4.443591  | -0.621557 | 0.009206  |
| C | 5.795713  | -0.272835 | 0.103556  |
| C | 6.077692  | 0.981313  | 0.636554  |
| H | 5.321105  | 2.833112  | 1.467715  |
| H | 2.917381  | 2.186630  | 1.288042  |
| H | 6.587121  | -0.948080 | -0.226964 |
| H | 7.118509  | 1.300058  | 0.728618  |
| N | 3.808050  | -1.754042 | -0.465684 |
| H | 4.262131  | -2.573373 | -0.856323 |
| N | 2.188375  | -0.380195 | 0.210010  |
| C | 2.470178  | -1.567358 | -0.332394 |
| C | -0.948627 | -2.600754 | -0.710691 |
| C | -0.930188 | -3.865141 | -1.313470 |
| C | 0.315489  | -4.431289 | -1.606930 |
| C | 1.497750  | -3.744968 | -1.308936 |
| C | 1.389539  | -2.479905 | -0.715808 |
| N | 0.190432  | -1.954550 | -0.438229 |
| H | 0.365119  | -5.416332 | -2.075413 |
| H | -1.854123 | -4.393160 | -1.556082 |
| H | 2.471284  | -4.181972 | -1.539277 |
| C | -2.114386 | -1.814016 | -0.300241 |
| C | -3.659707 | 1.072258  | 1.098971  |
| C | -5.028748 | 1.246687  | 1.266532  |
| C | -5.959332 | 0.252649  | 0.880910  |
| C | -5.549611 | -0.951469 | 0.316121  |
| C | -4.171062 | -1.125068 | 0.148018  |
| C | -3.226575 | -0.135260 | 0.526463  |
| H | -2.944976 | 1.837821  | 1.395835  |
| H | -5.398618 | 2.175032  | 1.707482  |
| H | -7.025724 | 0.435902  | 1.031442  |
| H | -6.265267 | -1.720185 | 0.019027  |
| N | -3.422752 | -2.168387 | -0.365849 |
| H | -3.792629 | -3.037977 | -0.735248 |

|    |           |           |           |
|----|-----------|-----------|-----------|
| N  | -1.956470 | -0.598756 | 0.231643  |
| Cr | 0.090548  | 0.049053  | 0.328795  |
| C  | 0.191423  | 0.843682  | -1.567907 |
| C  | -1.087341 | 1.467503  | -2.134513 |
| C  | -0.882085 | 2.771427  | -2.938477 |
| C  | -0.977943 | 3.736488  | 0.227258  |
| C  | 0.099486  | 1.774612  | 1.488790  |
| C  | 0.306814  | 3.158478  | 0.855025  |
| H  | 0.602223  | 0.073092  | -2.243931 |
| H  | -1.591611 | 0.736922  | -2.791824 |
| H  | -1.873195 | 3.139143  | -3.263433 |
| H  | -1.507470 | 4.339622  | 0.986062  |
| H  | 0.925320  | 1.547411  | 2.193919  |
| H  | 0.984184  | 1.591743  | -1.416260 |
| H  | -1.815599 | 1.664184  | -1.333912 |
| H  | -0.332200 | 2.523116  | -3.864812 |
| H  | -1.662586 | 2.911742  | -0.006783 |
| H  | -0.817748 | 1.779533  | 2.111199  |
| H  | 1.098779  | 3.096555  | 0.089502  |
| H  | 0.691552  | 3.883963  | 1.598793  |
| C  | -0.792483 | 4.594729  | -1.035027 |
| C  | -0.126999 | 3.923151  | -2.249526 |
| H  | -0.193308 | 5.486251  | -0.772660 |
| H  | -1.781967 | 4.979663  | -1.343397 |
| H  | 0.034787  | 4.706633  | -3.010486 |
| H  | 0.886387  | 3.584670  | -1.974601 |
| C  | -0.600155 | -1.340174 | 3.103076  |
| H  | -1.278663 | -2.162381 | 2.855770  |
| H  | -1.063882 | -0.394755 | 3.400241  |
| C  | 0.727780  | -1.492266 | 3.075327  |
| H  | 1.405841  | -0.677913 | 3.348067  |
| H  | 1.191128  | -2.446392 | 2.803614  |

<sup>4</sup>TS[9B-10B]

Geometry with 68 atoms:

Total energy: -2442.062303030

|   |           |           |           |
|---|-----------|-----------|-----------|
| C | 5.006273  | -2.090472 | -0.704528 |
| C | 3.677737  | -1.684254 | -0.648131 |
| C | 3.418963  | -0.343668 | -0.313595 |
| C | 4.498531  | 0.543105  | -0.055291 |
| C | 5.836200  | 0.135853  | -0.111132 |
| C | 6.069406  | -1.196358 | -0.438438 |
| H | 5.237321  | -3.126718 | -0.961332 |
| H | 2.866906  | -2.380102 | -0.859940 |
| H | 6.654618  | 0.829228  | 0.091095  |
| H | 7.097710  | -1.560759 | -0.493767 |
| N | 3.915293  | 1.764268  | 0.222255  |
| H | 4.407412  | 2.621916  | 0.449386  |
| N | 2.232128  | 0.357218  | -0.180217 |
| C | 2.567922  | 1.610998  | 0.134906  |
| C | -0.807883 | 2.838158  | 0.248569  |
| C | -0.733856 | 4.180517  | 0.633722  |
| C | 0.529706  | 4.734357  | 0.863002  |
| C | 1.677956  | 3.948697  | 0.717426  |

|    |           |           |           |    |           |           |           |
|----|-----------|-----------|-----------|----|-----------|-----------|-----------|
| C  | 1.525650  | 2.613123  | 0.325892  | C  | 4.947085  | 1.728606  | -0.217468 |
| N  | 0.305152  | 2.097605  | 0.087785  | C  | 3.614737  | 1.336448  | -0.272805 |
| H  | 0.619943  | 5.778945  | 1.166898  | C  | 3.339809  | -0.038551 | -0.187646 |
| H  | -1.640526 | 4.774742  | 0.760715  | C  | 4.400931  | -0.968503 | -0.030740 |
| H  | 2.666379  | 4.370217  | 0.908349  | C  | 5.743566  | -0.576252 | 0.020218  |
| C  | -2.005188 | 2.049477  | -0.003691 | C  | 5.995728  | 0.788497  | -0.079234 |
| C  | -3.641710 | -1.005281 | -0.815125 | H  | 5.193184  | 2.791030  | -0.278485 |
| C  | -5.016868 | -1.175563 | -0.928751 | H  | 2.811422  | 2.063587  | -0.366343 |
| C  | -5.916908 | -0.103796 | -0.720263 | H  | 6.549791  | -1.302595 | 0.137768  |
| C  | -5.470615 | 1.173604  | -0.393147 | H  | 7.027725  | 1.144629  | -0.042137 |
| C  | -4.085908 | 1.343367  | -0.278548 | N  | 3.792506  | -2.206192 | 0.066308  |
| C  | -3.172516 | 0.275915  | -0.484348 | H  | 4.264780  | -3.092425 | 0.210840  |
| H  | -2.947814 | -1.828281 | -0.976542 | N  | 2.140580  | -0.730854 | -0.195055 |
| H  | -5.415328 | -2.159905 | -1.184348 | C  | 2.452389  | -2.019190 | -0.023293 |
| H  | -6.989683 | -0.284388 | -0.819670 | C  | -0.934006 | -3.214246 | 0.087882  |
| H  | -6.165146 | 2.000512  | -0.233823 | C  | -0.870153 | -4.609662 | 0.181771  |
| N  | -3.304546 | 2.443659  | 0.023044  | C  | 0.395356  | -5.205832 | 0.233050  |
| H  | -3.641039 | 3.380937  | 0.217457  | C  | 1.553730  | -4.423254 | 0.171014  |
| N  | -1.888316 | 0.752808  | -0.299657 | C  | 1.401257  | -3.033901 | 0.083072  |
| C  | -0.571959 | -3.344257 | -1.257546 | N  | 0.184145  | -2.476207 | 0.075116  |
| C  | -0.667706 | -4.490714 | -0.217660 | H  | 0.479559  | -6.292021 | 0.306198  |
| C  | -0.934350 | -2.373926 | 3.060956  | H  | -1.776998 | -5.216570 | 0.204711  |
| C  | 0.040134  | -0.280651 | 1.811696  | H  | 2.542877  | -4.884175 | 0.179080  |
| C  | -1.200812 | -1.023969 | 2.358948  | C  | -2.126031 | -2.369871 | -0.030658 |
| H  | -1.577801 | -3.174996 | -1.683524 | C  | -3.738865 | 0.787518  | -0.352261 |
| H  | 0.345058  | -4.882479 | -0.012267 | C  | -5.113959 | 0.989170  | -0.350926 |
| H  | -1.877027 | -2.724408 | 3.521002  | C  | -6.024258 | -0.088879 | -0.237426 |
| H  | 0.199635  | 0.665984  | 2.355946  | C  | -5.588582 | -1.404580 | -0.111121 |
| H  | 0.059616  | -3.670757 | -2.102740 | C  | -4.203348 | -1.606204 | -0.109565 |
| H  | -1.224120 | -5.323801 | -0.680207 | C  | -3.279622 | -0.535444 | -0.238328 |
| H  | -0.233504 | -2.199935 | 3.897108  | H  | -3.036728 | 1.617448  | -0.423698 |
| H  | 0.956570  | -0.879091 | 1.962559  | H  | -5.505167 | 2.005441  | -0.435569 |
| H  | -1.952917 | -1.201432 | 1.567697  | H  | -7.096674 | 0.119096  | -0.242454 |
| H  | -1.728439 | -0.371749 | 3.077006  | H  | -6.290457 | -2.234814 | -0.012967 |
| Cr | 0.117773  | 0.089117  | -0.312051 | N  | -3.429033 | -2.745868 | 0.016803  |
| C  | -0.056399 | -2.067697 | -0.625503 | H  | -3.774099 | -3.691702 | 0.145206  |
| H  | 0.941286  | -2.231956 | -0.197267 | N  | -1.997747 | -1.051910 | -0.197170 |
| H  | -0.743157 | -1.843017 | 0.195495  | Cr | 0.026507  | -0.360021 | -0.233504 |
| C  | 0.081738  | -0.871153 | -2.533570 | C  | -0.257986 | 1.052505  | -1.688846 |
| H  | -0.889092 | -1.285870 | -2.815393 | C  | 0.642910  | 2.186787  | -2.178486 |
| H  | 0.933718  | -1.514887 | -2.767938 | C  | 0.647780  | 3.434010  | -1.283218 |
| C  | 0.249759  | 0.516732  | -2.508522 | C  | -0.724561 | 2.551549  | 1.716448  |
| H  | 1.242644  | 0.946271  | -2.662152 | C  | 0.009698  | 0.103871  | 1.775673  |
| H  | -0.602337 | 1.166867  | -2.721887 | C  | 0.354846  | 1.546871  | 2.125085  |
| C  | -1.331550 | -4.096036 | 1.121873  | H  | -1.313793 | 1.371471  | -1.674420 |
| C  | -0.364849 | -3.500577 | 2.179981  | H  | 1.677181  | 1.817930  | -2.288259 |
| H  | -2.158634 | -3.391983 | 0.918280  | H  | 1.447634  | 4.118699  | -1.618867 |
| H  | -1.819376 | -4.984627 | 1.555334  | H  | -1.663399 | 2.319260  | 2.251839  |
| H  | 0.552401  | -3.136685 | 1.691847  | H  | 0.733906  | -0.601067 | 2.220820  |
| H  | -0.025208 | -4.318689 | 2.838266  | H  | -0.228664 | 0.213504  | -2.435373 |
|    |           |           |           | H  | 0.339740  | 2.498811  | -3.198652 |
|    |           |           |           | H  | 0.919430  | 3.136472  | -0.259702 |
|    |           |           |           | H  | -0.953234 | 2.395715  | 0.652723  |
|    |           |           |           | H  | -0.994448 | -0.162810 | 2.150514  |

<sup>41</sup>B  
Geometry with 68 atoms:  
Total energy: -2442.128847120

|   |           |          |           |
|---|-----------|----------|-----------|
| H | 1.315089  | 1.831752 | 1.655090  |
| H | 0.535894  | 1.638789 | 3.215593  |
| C | -0.350069 | 4.019281 | 1.965846  |
| C | -0.673530 | 4.218395 | -1.271541 |
| H | 0.715843  | 4.180343 | 1.723133  |
| H | -0.436202 | 4.224331 | 3.047235  |
| H | -1.524238 | 3.536738 | -1.098870 |
| H | -0.828074 | 4.626185 | -2.286066 |
| C | -1.202780 | 5.030692 | 1.179045  |
| C | -0.736627 | 5.369930 | -0.249880 |
| H | -1.240414 | 5.979885 | 1.740804  |
| H | -2.247462 | 4.667609 | 1.143025  |
| H | 0.255919  | 5.855246 | -0.196896 |
| H | -1.421910 | 6.143366 | -0.637734 |

#### <sup>411</sup>B

Geometry with 56 atoms:

Total energy: -2285.002031810

|   |           |           |           |
|---|-----------|-----------|-----------|
| C | 4.890732  | 2.276458  | -1.162872 |
| C | 3.589324  | 1.784121  | -1.054383 |
| C | 3.413251  | 0.505337  | -0.504352 |
| C | 4.547065  | -0.241072 | -0.086770 |
| C | 5.850757  | 0.248013  | -0.194234 |
| C | 6.003969  | 1.523278  | -0.739708 |
| H | 5.050446  | 3.269919  | -1.588255 |
| H | 2.744515  | 2.382840  | -1.393511 |
| H | 6.709745  | -0.341219 | 0.132785  |
| H | 7.006673  | 1.944390  | -0.842111 |
| N | 4.048616  | -1.439252 | 0.394822  |
| H | 4.595632  | -2.207499 | 0.767380  |
| N | 2.271148  | -0.251835 | -0.262760 |
| C | 2.694333  | -1.416644 | 0.275982  |
| C | -0.622858 | -2.819888 | 0.605141  |
| C | -0.438785 | -4.075354 | 1.172492  |
| C | 0.863434  | -4.514321 | 1.477387  |
| C | 1.955220  | -3.671633 | 1.199636  |
| C | 1.729751  | -2.422016 | 0.632693  |
| N | 0.450107  | -1.991336 | 0.334301  |
| H | 1.023896  | -5.496923 | 1.922319  |
| H | -1.299750 | -4.715227 | 1.378439  |
| H | 2.974997  | -3.991897 | 1.426243  |
| C | -1.854629 | -2.192183 | 0.207815  |
| C | -3.702596 | 0.496394  | -1.254347 |
| C | -5.085042 | 0.521675  | -1.440291 |
| C | -5.901983 | -0.555335 | -1.041119 |
| C | -5.360247 | -1.694918 | -0.444672 |
| C | -3.975663 | -1.715117 | -0.260945 |
| C | -3.138985 | -0.636895 | -0.652096 |
| H | -3.080282 | 1.331636  | -1.572358 |
| H | -5.545297 | 1.394521  | -1.909021 |
| H | -6.980494 | -0.498813 | -1.205132 |
| H | -5.988528 | -2.533715 | -0.138779 |
| N | -3.126970 | -2.667879 | 0.276207  |
| H | -3.399690 | -3.571408 | 0.647110  |

|    |           |           |           |
|----|-----------|-----------|-----------|
| N  | -1.823203 | -0.959066 | -0.341523 |
| Cr | 0.162358  | -0.206167 | -0.417051 |
| C  | -0.106423 | 1.904418  | -1.663664 |
| C  | -2.038657 | 6.188310  | 2.154687  |
| C  | 0.005792  | 2.307797  | -0.375310 |
| H  | 0.776385  | 1.724639  | -2.286444 |
| H  | -1.076493 | 1.854784  | -2.168602 |
| C  | -2.129175 | 4.701606  | 1.814809  |
| H  | -2.107772 | 6.811830  | 1.247227  |
| H  | -1.082461 | 6.429379  | 2.649318  |
| C  | -1.115931 | 2.739075  | 0.524403  |
| H  | 1.012828  | 2.423318  | 0.048561  |
| C  | -1.017442 | 4.236596  | 0.870679  |
| H  | -3.109969 | 4.483666  | 1.354837  |
| H  | -2.089530 | 4.103186  | 2.742998  |
| H  | -2.091567 | 2.525797  | 0.061735  |
| H  | -1.073329 | 2.159083  | 1.464623  |
| H  | -1.051894 | 4.824457  | -0.063766 |
| H  | -0.033010 | 4.444305  | 1.327975  |
| H  | -2.850803 | 6.496320  | 2.832546  |

#### <sup>412</sup>B

Geometry with 62 atoms:

Total energy: -2363.579680140

|   |           |           |           |
|---|-----------|-----------|-----------|
| C | 3.548436  | -4.347986 | 1.149989  |
| C | 2.716684  | -3.229759 | 1.078966  |
| C | 3.205280  | -2.087193 | 0.429231  |
| C | 4.514627  | -2.095172 | -0.120164 |
| C | 5.350044  | -3.212182 | -0.051341 |
| C | 4.842885  | -4.341808 | 0.592653  |
| H | 3.188951  | -5.249562 | 1.651370  |
| H | 1.720805  | -3.250217 | 1.521223  |
| H | 6.353630  | -3.200829 | -0.480998 |
| H | 5.462896  | -5.238006 | 0.668030  |
| N | 4.694758  | -0.838216 | -0.672331 |
| H | 5.528355  | -0.506538 | -1.144960 |
| N | 2.632889  | -0.843056 | 0.191777  |
| C | 3.559654  | -0.116969 | -0.469847 |
| C | 1.476234  | 2.824844  | -0.733718 |
| C | 2.240719  | 3.759791  | -1.422031 |
| C | 3.544839  | 3.423058  | -1.831451 |
| C | 4.047399  | 2.141685  | -1.540157 |
| C | 3.249964  | 1.233849  | -0.852497 |
| N | 1.972126  | 1.569198  | -0.442724 |
| H | 4.157527  | 4.146446  | -2.370427 |
| H | 1.829380  | 4.746548  | -1.645795 |
| H | 5.055214  | 1.856815  | -1.851763 |
| C | 0.137592  | 2.970166  | -0.227357 |
| C | -2.754748 | 1.786264  | 1.518679  |
| C | -3.909751 | 2.530347  | 1.762734  |
| C | -4.039589 | 3.860966  | 1.318342  |
| C | -3.012109 | 4.490797  | 0.615682  |
| C | -1.858552 | 3.741545  | 0.373600  |
| C | -1.709692 | 2.397737  | 0.808696  |

|    |           |           |           |
|----|-----------|-----------|-----------|
| H  | -2.681358 | 0.760124  | 1.875362  |
| H  | -4.732462 | 2.069592  | 2.314296  |
| H  | -4.959516 | 4.410446  | 1.530504  |
| H  | -3.102041 | 5.523027  | 0.271571  |
| N  | -0.676587 | 4.057637  | -0.271992 |
| H  | -0.447254 | 4.951168  | -0.692453 |
| N  | -0.455863 | 1.937851  | 0.412411  |
| Cr | 0.845950  | 0.249278  | 0.470516  |
| C  | -7.728410 | -3.791492 | -1.453097 |
| C  | -6.589349 | -2.783965 | -1.602242 |
| H  | -7.418619 | -4.798491 | -1.780956 |
| H  | -8.606980 | -3.502473 | -2.052491 |
| C  | -0.425011 | -1.261229 | 1.898393  |
| C  | -5.347411 | -3.147648 | -0.783717 |
| H  | -6.308764 | -2.696160 | -2.667790 |
| H  | -6.940919 | -1.780456 | -1.299466 |
| C  | -0.679295 | -1.759058 | 0.662878  |
| H  | 0.393786  | -1.650382 | 2.512546  |
| H  | -1.092796 | -0.540627 | 2.380322  |
| C  | -4.206956 | -2.136583 | -0.919953 |
| H  | -5.628010 | -3.239100 | 0.282249  |
| H  | -4.988736 | -4.148748 | -1.087443 |
| C  | -1.865455 | -1.424211 | -0.196964 |
| H  | -8.055399 | -3.873813 | -0.402402 |
| H  | -0.023525 | -2.550943 | 0.277753  |
| C  | -2.977448 | -2.486467 | -0.078831 |
| H  | -4.570352 | -1.134093 | -0.626893 |
| H  | -3.912682 | -2.052835 | -1.982233 |
| H  | -2.279996 | -0.443634 | 0.076279  |
| H  | -1.547418 | -1.357099 | -1.251778 |
| H  | -3.267288 | -2.578474 | 0.982864  |
| H  | -2.583978 | -3.474211 | -0.377739 |

<sup>6</sup>1B

Geometry with 38 atoms:

Total energy: -2049.268256970

|   |           |           |           |
|---|-----------|-----------|-----------|
| C | 4.988796  | -2.698250 | -0.060374 |
| C | 3.633562  | -2.369077 | -0.041768 |
| C | 3.292987  | -1.010264 | -0.009645 |
| C | 4.308297  | -0.019324 | -0.001413 |
| C | 5.666514  | -0.345583 | -0.020788 |
| C | 5.988463  | -1.703493 | -0.049717 |
| H | 5.284708  | -3.749533 | -0.085008 |
| H | 2.863845  | -3.143973 | -0.052911 |
| H | 6.440223  | 0.424579  | -0.012685 |
| H | 7.039017  | -2.002275 | -0.065534 |
| N | 3.642197  | 1.195391  | 0.028401  |
| H | 4.073650  | 2.112894  | 0.057055  |
| N | 2.058113  | -0.379480 | 0.012916  |
| C | 2.303633  | 0.949938  | 0.040921  |
| C | -1.196457 | 1.875515  | 0.059312  |
| C | -1.218691 | 3.259221  | -0.078451 |
| C | 0.000000  | 3.964328  | -0.123131 |
| C | 1.218691  | 3.259221  | -0.078451 |

|    |           |           |           |
|----|-----------|-----------|-----------|
| C  | 1.196457  | 1.875515  | 0.059312  |
| N  | -0.000000 | 1.205187  | 0.199660  |
| H  | 0.000000  | 5.049411  | -0.233907 |
| H  | -2.170026 | 3.788307  | -0.169813 |
| H  | 2.170027  | 3.788307  | -0.169813 |
| C  | -2.303633 | 0.949938  | 0.040922  |
| C  | -3.633562 | -2.369077 | -0.041767 |
| C  | -4.988796 | -2.698250 | -0.060373 |
| C  | -5.988463 | -1.703493 | -0.049717 |
| C  | -5.666514 | -0.345583 | -0.020789 |
| C  | -4.308297 | -0.019324 | -0.001413 |
| C  | -3.292987 | -1.010263 | -0.009644 |
| H  | -2.863845 | -3.143972 | -0.052909 |
| H  | -5.284708 | -3.749533 | -0.085007 |
| H  | -7.039017 | -2.002276 | -0.065534 |
| H  | -6.440223 | 0.424579  | -0.012687 |
| N  | -3.642197 | 1.195391  | 0.028400  |
| H  | -4.073650 | 2.112894  | 0.057055  |
| N  | -2.058113 | -0.379480 | 0.012916  |
| Cr | -0.000000 | -0.784110 | 0.066562  |

<sup>6</sup>2B

Geometry with 44 atoms:

Total energy: -2127.832537370

|   |           |           |           |
|---|-----------|-----------|-----------|
| C | -4.988373 | -2.450495 | -0.023625 |
| C | -3.631812 | -2.124113 | -0.029069 |
| C | -3.284156 | -0.765507 | -0.025977 |
| C | -4.301618 | 0.224465  | -0.008572 |
| C | -5.660475 | -0.099027 | -0.002126 |
| C | -5.986899 | -1.455850 | -0.011929 |
| H | -5.284338 | -3.502027 | -0.028050 |
| H | -2.872224 | -2.905696 | -0.031813 |
| H | -6.431348 | 0.673966  | 0.010065  |
| H | -7.038110 | -1.752666 | -0.008843 |
| N | -3.640095 | 1.441023  | -0.000416 |
| H | -4.074873 | 2.357227  | 0.010988  |
| N | -2.048535 | -0.129942 | -0.033721 |
| C | -2.301076 | 1.200026  | -0.014738 |
| C | 1.197053  | 2.126827  | -0.007411 |
| C | 1.219747  | 3.516764  | 0.036382  |
| C | 0.000016  | 4.221167  | 0.056500  |
| C | -1.219716 | 3.516768  | 0.036357  |
| C | -1.197027 | 2.126830  | -0.007432 |
| N | 0.000012  | 1.447645  | -0.034818 |
| H | 0.000017  | 5.311312  | 0.095031  |
| H | 2.169990  | 4.054809  | 0.061806  |
| H | -2.169959 | 4.054816  | 0.061763  |
| C | 2.301100  | 1.200018  | -0.014710 |
| C | 3.631802  | -2.124126 | -0.029164 |
| C | 4.988359  | -2.450527 | -0.023711 |
| C | 5.986895  | -1.455893 | -0.011933 |
| C | 5.660489  | -0.099065 | -0.002067 |
| C | 4.301635  | 0.224444  | -0.008528 |
| C | 3.284166  | -0.765517 | -0.025996 |

|    |           |           |           |
|----|-----------|-----------|-----------|
| H  | 2.872188  | -2.905684 | -0.032003 |
| H  | 5.284311  | -3.502063 | -0.028198 |
| H  | 7.038103  | -1.752721 | -0.008841 |
| H  | 6.431371  | 0.673917  | 0.010173  |
| N  | 3.640120  | 1.441006  | -0.000342 |
| H  | 4.074904  | 2.357208  | 0.011091  |
| N  | 2.048551  | -0.129947 | -0.033733 |
| Cr | 0.000008  | -0.539247 | -0.047617 |
| C  | -0.000066 | -2.916219 | -0.523956 |
| C  | -0.000095 | -2.822366 | 0.829018  |
| H  | -0.929581 | -3.008472 | -1.095499 |
| H  | 0.929485  | -3.008424 | -1.095450 |
| H  | 0.932563  | -2.831801 | 1.403973  |
| H  | -0.932766 | -2.831890 | 1.403950  |

|    |           |           |           |
|----|-----------|-----------|-----------|
| N  | 2.048864  | -0.017714 | -0.066331 |
| Cr | -0.006474 | -0.474016 | -0.102674 |
| C  | 0.049188  | -1.217871 | 2.463997  |
| C  | 0.323726  | -2.436446 | 1.968436  |
| H  | 0.846589  | -0.515514 | 2.727461  |
| H  | -0.976590 | -0.909378 | 2.691041  |
| H  | -0.468045 | -3.164846 | 1.764573  |
| H  | 1.354458  | -2.765054 | 1.799310  |
| C  | -0.125172 | -1.674177 | -2.276534 |
| C  | -0.030780 | -2.747371 | -1.463573 |
| H  | 0.764840  | -1.219302 | -2.724916 |
| H  | -1.097157 | -1.281946 | -2.593452 |
| H  | -0.920835 | -3.265921 | -1.094936 |
| H  | 0.936215  | -3.200147 | -1.225185 |

<sup>63</sup>B

Geometry with 50 atoms:  
 Total energy: -2206.374235110

|   |           |           |           |
|---|-----------|-----------|-----------|
| C | -4.991234 | -2.360806 | 0.037428  |
| C | -3.636254 | -2.026569 | 0.020725  |
| C | -3.297674 | -0.667084 | -0.014340 |
| C | -4.317897 | 0.320306  | -0.016804 |
| C | -5.674475 | -0.010813 | -0.001336 |
| C | -5.993651 | -1.370436 | 0.023497  |
| H | -5.282706 | -3.413279 | 0.065048  |
| H | -2.865365 | -2.798160 | 0.043689  |
| H | -6.450411 | 0.757184  | -0.006717 |
| H | -7.043477 | -1.671856 | 0.036714  |
| N | -3.656800 | 1.537864  | -0.033198 |
| H | -4.091877 | 2.453935  | -0.038590 |
| N | -2.065370 | -0.031689 | -0.035640 |
| C | -2.315651 | 1.297840  | -0.038881 |
| C | 1.180582  | 2.231210  | -0.030881 |
| C | 1.199381  | 3.621302  | 0.009138  |
| C | -0.022531 | 4.323195  | 0.027537  |
| C | -1.239763 | 3.612759  | 0.010416  |
| C | -1.211251 | 2.222941  | -0.028984 |
| N | -0.013140 | 1.545909  | -0.056556 |
| H | -0.026370 | 5.413485  | 0.059861  |
| H | 2.148417  | 4.162013  | 0.026228  |
| H | -2.192408 | 4.146902  | 0.030179  |
| C | 2.290810  | 1.313532  | -0.049092 |
| C | 3.633044  | -2.003023 | -0.050493 |
| C | 4.990243  | -2.328610 | -0.030021 |
| C | 5.986037  | -1.331735 | -0.015330 |
| C | 5.657689  | 0.025950  | -0.017856 |
| C | 4.299043  | 0.348249  | -0.038249 |
| C | 3.284878  | -0.645325 | -0.057807 |
| H | 2.867266  | -2.779685 | -0.054531 |
| H | 5.288431  | -3.379521 | -0.023428 |
| H | 7.037762  | -1.626308 | 0.000839  |
| H | 6.428298  | 0.799186  | -0.003548 |
| N | 3.630463  | 1.561673  | -0.033670 |
| H | 4.060477  | 2.480202  | -0.023659 |

<sup>64</sup>B

Geometry with 50 atoms:  
 Total energy: -2206.360595610

|   |           |           |           |
|---|-----------|-----------|-----------|
| C | -5.095645 | -2.142279 | -0.538562 |
| C | -3.736102 | -1.851986 | -0.546965 |
| C | -3.359929 | -0.516560 | -0.327624 |
| C | -4.347416 | 0.481520  | -0.117767 |
| C | -5.716498 | 0.190708  | -0.109586 |
| C | -6.069912 | -1.138619 | -0.322048 |
| H | -5.423966 | -3.170974 | -0.703429 |
| H | -2.982659 | -2.620736 | -0.715076 |
| H | -6.467651 | 0.965354  | 0.055008  |
| H | -7.126743 | -1.415209 | -0.323172 |
| N | -3.644910 | 1.659763  | 0.058604  |
| H | -4.046435 | 2.575755  | 0.230917  |
| N | -2.110400 | 0.074502  | -0.267322 |
| C | -2.321397 | 1.372614  | -0.035288 |
| C | 1.150764  | 2.299132  | 0.067028  |
| C | 1.193707  | 3.681298  | 0.289635  |
| C | -0.021003 | 4.364197  | 0.417630  |
| C | -1.235353 | 3.674870  | 0.324305  |
| C | -1.191022 | 2.293992  | 0.096413  |
| N | -0.019765 | 1.650690  | -0.025151 |
| H | -0.021304 | 5.441956  | 0.592837  |
| H | 2.144868  | 4.212730  | 0.360252  |
| H | -2.187526 | 4.199955  | 0.422736  |
| C | 2.283617  | 1.382954  | -0.079351 |
| C | 3.725488  | -1.837841 | -0.533992 |
| C | 5.088263  | -2.112169 | -0.550175 |
| C | 6.055052  | -1.091385 | -0.388252 |
| C | 5.689628  | 0.238552  | -0.202254 |
| C | 4.317129  | 0.512565  | -0.184539 |
| C | 3.335924  | -0.500634 | -0.348897 |
| H | 2.979791  | -2.622949 | -0.656135 |
| H | 5.424825  | -3.141693 | -0.691563 |
| H | 7.114974  | -1.355050 | -0.409382 |
| H | 6.434576  | 1.026384  | -0.076092 |
| N | 3.605732  | 1.686310  | -0.018240 |
| H | 4.000335  | 2.609953  | 0.126724  |

|    |           |           |           |
|----|-----------|-----------|-----------|
| N  | 2.081047  | 0.078963  | -0.281095 |
| H  | -0.319629 | -4.478354 | 0.361054  |
| H  | -1.436916 | -3.229436 | 0.898439  |
| H  | 0.901938  | -2.859106 | -1.083928 |
| H  | -0.810044 | -2.769014 | -1.469610 |
| C  | -0.390644 | -3.393539 | 0.576027  |
| C  | -0.076540 | -2.545429 | -0.668662 |
| Cr | -0.025630 | -0.467500 | -0.344260 |
| C  | 0.314090  | -1.723261 | 2.354711  |
| C  | 0.524966  | -3.077635 | 1.773337  |
| H  | 1.118326  | -1.192219 | 2.873444  |
| H  | -0.705014 | -1.336517 | 2.479256  |
| H  | 0.354398  | -3.837424 | 2.569448  |
| H  | 1.584043  | -3.201385 | 1.482213  |

<sup>65</sup>B

Geometry with 56 atoms:

Total energy: -2284.898421770

|   |           |           |           |
|---|-----------|-----------|-----------|
| C | 5.007279  | -2.226959 | 0.145949  |
| C | 3.653373  | -1.895964 | 0.130764  |
| C | 3.314900  | -0.538137 | 0.047015  |
| C | 4.333524  | 0.447717  | -0.026500 |
| C | 5.691699  | 0.118833  | -0.008881 |
| C | 6.010063  | -1.236420 | 0.079392  |
| H | 5.300968  | -3.277216 | 0.209577  |
| H | 2.881146  | -2.663645 | 0.174565  |
| H | 6.466890  | 0.885596  | -0.063162 |
| H | 7.059908  | -1.537767 | 0.095128  |
| N | 3.671663  | 1.661587  | -0.111327 |
| H | 4.105129  | 2.576702  | -0.168428 |
| N | 2.083296  | 0.097684  | 0.013211  |
| C | 2.334047  | 1.416002  | -0.086107 |
| C | -1.155293 | 2.339228  | -0.149639 |
| C | -1.180011 | 3.711901  | -0.377909 |
| C | 0.036342  | 4.408356  | -0.491632 |
| C | 1.250742  | 3.705772  | -0.398097 |
| C | 1.222817  | 2.333770  | -0.168100 |
| N | 0.032236  | 1.664540  | -0.008952 |
| H | 0.037510  | 5.483846  | -0.673921 |
| H | -2.132614 | 4.238159  | -0.474848 |
| H | 2.204981  | 4.225872  | -0.510552 |
| C | -2.272707 | 1.429329  | -0.060978 |
| C | -3.673832 | -1.853790 | 0.130810  |
| C | -5.036169 | -2.148671 | 0.151520  |
| C | -6.013445 | -1.133129 | 0.096858  |
| C | -5.657772 | 0.212729  | 0.017462  |
| C | -4.291263 | 0.504292  | -0.003953 |
| C | -3.293917 | -0.505109 | 0.054086  |
| H | -2.932822 | -2.651346 | 0.164834  |
| H | -5.355401 | -3.191722 | 0.209421  |
| H | -7.070844 | -1.406551 | 0.115107  |
| H | -6.410792 | 1.001931  | -0.026734 |
| N | -3.604313 | 1.702895  | -0.078080 |
| H | -4.018496 | 2.627487  | -0.124859 |

|    |           |           |           |
|----|-----------|-----------|-----------|
| N  | -2.045178 | 0.104353  | 0.022245  |
| H  | -0.232582 | -4.472660 | -1.153161 |
| H  | 1.243706  | -3.527140 | -1.367065 |
| H  | -0.949612 | -2.671062 | 0.678764  |
| H  | 0.792042  | -3.176570 | 1.057242  |
| C  | 0.176068  | -3.439284 | -1.101108 |
| C  | 0.039565  | -2.946681 | 0.295940  |
| Cr | 0.029248  | -0.330457 | -0.064419 |
| C  | 0.021536  | -1.103882 | -2.003785 |
| C  | -0.543588 | -2.519060 | -2.096073 |
| H  | -0.543142 | -0.383362 | -2.620424 |
| H  | 1.079559  | -1.077430 | -2.318342 |
| H  | -0.446694 | -2.930263 | -3.118952 |
| H  | -1.625777 | -2.519511 | -1.875256 |
| C  | 0.467025  | -0.135007 | 3.108919  |
| H  | 1.485107  | -0.509857 | 3.257476  |
| H  | 0.353002  | 0.949006  | 3.007483  |
| C  | -0.586671 | -0.956133 | 3.063771  |
| H  | -1.605001 | -0.578565 | 2.928045  |
| H  | -0.477910 | -2.038572 | 3.186111  |

<sup>66</sup>B

Geometry with 56 atoms:

Total energy: -2284.932789700

|   |           |           |           |
|---|-----------|-----------|-----------|
| C | 5.089781  | -1.613636 | -0.863076 |
| C | 3.718530  | -1.391435 | -0.806860 |
| C | 3.285936  | -0.091950 | -0.496581 |
| C | 4.230964  | 0.939823  | -0.256252 |
| C | 5.611959  | 0.718481  | -0.313796 |
| C | 6.021449  | -0.576090 | -0.620881 |
| H | 5.460810  | -2.613058 | -1.101269 |
| H | 2.996185  | -2.184871 | -0.994399 |
| H | 6.330436  | 1.518974  | -0.128091 |
| H | 7.089707  | -0.797699 | -0.677430 |
| N | 3.478628  | 2.067807  | 0.014779  |
| H | 3.840716  | 2.990508  | 0.231649  |
| N | 2.011432  | 0.430625  | -0.365299 |
| C | 2.166824  | 1.721175  | -0.059662 |
| C | -1.341750 | 2.474928  | 0.199375  |
| C | -1.438526 | 3.849238  | 0.448453  |
| C | -0.253937 | 4.588235  | 0.538803  |
| C | 0.985651  | 3.958862  | 0.382563  |
| C | 0.998656  | 2.578127  | 0.148940  |
| N | -0.145402 | 1.877335  | 0.070593  |
| H | -0.297513 | 5.663610  | 0.722834  |
| H | -2.409089 | 4.336002  | 0.559572  |
| H | 1.913198  | 4.532508  | 0.428194  |
| C | -2.439092 | 1.522852  | 0.022918  |
| C | -3.743524 | -1.708379 | -0.692087 |
| C | -5.092249 | -2.045478 | -0.705040 |
| C | -6.100321 | -1.091454 | -0.428277 |
| C | -5.792446 | 0.232661  | -0.129230 |
| C | -4.434218 | 0.570686  | -0.115759 |
| C | -3.412894 | -0.377156 | -0.389265 |

|    |           |           |           |
|----|-----------|-----------|-----------|
| H  | -2.965143 | -2.439839 | -0.904626 |
| H  | -5.384609 | -3.072616 | -0.934639 |
| H  | -7.147110 | -1.403182 | -0.450019 |
| H  | -6.569922 | 0.968490  | 0.084057  |
| N  | -3.772747 | 1.758459  | 0.136928  |
| H  | -4.205941 | 2.646408  | 0.368130  |
| N  | -2.184234 | 0.251770  | -0.295565 |
| Cr | -0.059569 | -0.212612 | -0.402720 |
| C  | -0.068489 | -1.308862 | 2.149598  |
| C  | 1.114156  | -2.198166 | 2.282966  |
| C  | 0.890158  | -3.667079 | 1.898964  |
| C  | 0.828299  | -3.995691 | 0.399444  |
| C  | -0.077917 | -2.147104 | -1.228041 |
| C  | -0.355537 | -3.432511 | -0.422351 |
| H  | -1.084354 | -1.708963 | 2.222641  |
| H  | 1.970453  | -1.780810 | 1.718873  |
| H  | -0.033842 | -4.025226 | 2.389848  |
| H  | 1.779475  | -3.693191 | -0.073915 |
| H  | 0.844905  | -2.296619 | -1.825144 |
| H  | 0.048706  | -0.224701 | 2.269457  |
| H  | 1.445119  | -2.161984 | 3.345938  |
| H  | 1.710352  | -4.259520 | 2.339452  |
| H  | 0.808797  | -5.096499 | 0.325728  |
| H  | -0.880942 | -2.032160 | -1.987613 |
| H  | -0.674543 | -4.232598 | -1.118588 |
| H  | -1.218710 | -3.292719 | 0.255400  |

#### <sup>6</sup>TS[6B-11B]

Geometry with 56 atoms:

Total energy: -2284.913298060

|   |           |           |           |
|---|-----------|-----------|-----------|
| C | 5.051633  | -1.699948 | -0.097491 |
| C | 3.683144  | -1.435767 | -0.066241 |
| C | 3.272876  | -0.096562 | -0.072972 |
| C | 4.240721  | 0.940462  | -0.116297 |
| C | 5.613674  | 0.681217  | -0.147837 |
| C | 6.002312  | -0.658554 | -0.136525 |
| H | 5.396715  | -2.736354 | -0.092184 |
| H | 2.952205  | -2.241563 | -0.039343 |
| H | 6.347309  | 1.489039  | -0.180473 |
| H | 7.066038  | -0.905996 | -0.159710 |
| N | 3.519274  | 2.121591  | -0.123476 |
| H | 3.906223  | 3.058739  | -0.151797 |
| N | 2.008063  | 0.475819  | -0.054439 |
| C | 2.195960  | 1.810096  | -0.087840 |
| C | -1.334522 | 2.581490  | -0.041016 |
| C | -1.414081 | 3.970612  | -0.022686 |
| C | -0.229269 | 4.726992  | -0.040957 |
| C | 1.015742  | 4.071319  | -0.065874 |
| C | 1.047724  | 2.681599  | -0.081723 |
| N | -0.114444 | 1.946071  | -0.085315 |
| H | -0.274613 | 5.816722  | -0.027858 |
| H | -2.385959 | 4.467049  | 0.007012  |
| H | 1.944884  | 4.646044  | -0.065792 |
| C | -2.408377 | 1.620318  | -0.032553 |

|    |           |           |           |
|----|-----------|-----------|-----------|
| C  | -3.644335 | -1.734529 | -0.147779 |
| C  | -4.989875 | -2.097096 | -0.194319 |
| C  | -6.016407 | -1.130538 | -0.180052 |
| C  | -5.727544 | 0.232978  | -0.128913 |
| C  | -4.377904 | 0.592079  | -0.083480 |
| C  | -3.332501 | -0.368817 | -0.078957 |
| H  | -2.861085 | -2.490534 | -0.177317 |
| H  | -5.255616 | -3.155341 | -0.247674 |
| H  | -7.058584 | -1.455571 | -0.216989 |
| H  | -6.518305 | 0.985671  | -0.129384 |
| N  | -3.752646 | 1.826411  | -0.051250 |
| H  | -4.212577 | 2.730145  | -0.067543 |
| N  | -2.115093 | 0.302132  | -0.033034 |
| Cr | -0.043772 | -0.013401 | 0.170175  |
| H  | -1.303806 | -2.570052 | 1.150937  |
| H  | -0.159123 | -2.059834 | -0.143674 |
| H  | 1.017722  | -1.012630 | 2.405726  |
| H  | -0.793379 | -0.725527 | 2.586448  |
| C  | -0.246210 | -2.273185 | 1.128806  |
| C  | 0.022543  | -1.086426 | 1.948097  |
| C  | -0.029062 | -2.705909 | -1.648837 |
| C  | 0.663553  | -3.498652 | 1.221467  |
| C  | 0.460542  | -4.498749 | 0.078622  |
| C  | 0.800327  | -3.908388 | -1.304950 |
| H  | -1.100489 | -2.859741 | -1.826141 |
| H  | 0.420132  | -1.909608 | -2.256080 |
| H  | 1.716342  | -3.178096 | 1.273007  |
| H  | 0.449941  | -3.989149 | 2.186852  |
| H  | 1.081748  | -5.391129 | 0.255572  |
| H  | -0.589033 | -4.845620 | 0.080602  |
| H  | 1.871720  | -3.650972 | -1.341935 |
| H  | 0.652067  | -4.694461 | -2.072020 |

#### <sup>6</sup>7B

Geometry with 62 atoms:

Total energy: -2363.480065010

|   |           |           |           |
|---|-----------|-----------|-----------|
| C | -5.153638 | -2.098891 | 0.837639  |
| C | -3.803664 | -1.770283 | 0.811421  |
| C | -3.458186 | -0.500768 | 0.322141  |
| C | -4.465557 | 0.396701  | -0.119234 |
| C | -5.825604 | 0.067901  | -0.092855 |
| C | -6.148998 | -1.195840 | 0.391296  |
| H | -5.457392 | -3.079399 | 1.210987  |
| H | -3.033292 | -2.462107 | 1.151577  |
| H | -6.591891 | 0.764890  | -0.437422 |
| H | -7.197706 | -1.499463 | 0.429481  |
| N | -3.792066 | 1.535475  | -0.519938 |
| H | -4.218386 | 2.376354  | -0.895942 |
| N | -2.226420 | 0.108944  | 0.177376  |
| C | -2.465420 | 1.324989  | -0.321203 |
| C | 0.983405  | 2.348033  | -0.441639 |
| C | 1.004903  | 3.606642  | -1.055215 |
| C | -0.215391 | 4.177833  | -1.432853 |
| C | -1.414287 | 3.495353  | -1.215180 |



|    |           |           |           |    |           |           |           |
|----|-----------|-----------|-----------|----|-----------|-----------|-----------|
| C  | -1.351609 | 2.239752  | -0.597200 | H  | 5.401452  | -2.720705 | -0.820380 |
| N  | -0.177902 | 1.717923  | -0.208845 | H  | 2.973332  | -2.196633 | -0.730075 |
| H  | -0.228686 | 5.157432  | -1.914843 | H  | 6.431012  | 1.434532  | -0.160252 |
| H  | 1.945105  | 4.124798  | -1.249946 | H  | 7.108253  | -0.945935 | -0.542965 |
| H  | -2.367198 | 3.922421  | -1.533711 | N  | 3.621659  | 2.113270  | -0.041894 |
| C  | 2.132893  | 1.531808  | -0.024633 | H  | 4.029464  | 3.027168  | 0.122905  |
| C  | 3.584224  | -1.465168 | 1.239027  | N  | 2.076305  | 0.522130  | -0.317404 |
| C  | 4.946279  | -1.690435 | 1.398370  | C  | 2.290556  | 1.840521  | -0.083358 |
| C  | 5.908808  | -0.705189 | 1.070706  | C  | -1.175051 | 2.718267  | 0.138870  |
| C  | 5.539694  | 0.541304  | 0.570456  | C  | -1.229301 | 4.131071  | 0.384581  |
| C  | 4.168166  | 0.767588  | 0.413955  | C  | -0.010043 | 4.809942  | 0.480863  |
| C  | 3.193797  | -0.211128 | 0.741499  | C  | 1.220179  | 4.160395  | 0.343919  |
| H  | 2.840902  | -2.226300 | 1.476944  | C  | 1.191454  | 2.744774  | 0.105508  |
| H  | 5.285907  | -2.655774 | 1.780515  | N  | 0.013798  | 2.102907  | 0.027227  |
| H  | 6.968499  | -0.930513 | 1.210610  | H  | -0.019765 | 5.887474  | 0.666297  |
| H  | 6.279031  | 1.302582  | 0.315250  | H  | -2.183151 | 4.648885  | 0.483386  |
| N  | 3.451409  | 1.856201  | -0.057003 | H  | 2.164517  | 4.700634  | 0.410704  |
| H  | 3.845217  | 2.731568  | -0.385513 | C  | -2.257753 | 1.794187  | -0.051627 |
| N  | 1.942099  | 0.294610  | 0.443997  | C  | -3.615640 | -1.431920 | -0.815533 |
| Cr | -0.140347 | -0.269405 | 0.610999  | C  | -4.975321 | -1.727995 | -0.931613 |
| C  | 2.677031  | -1.715797 | -2.725577 | C  | -5.965352 | -0.745861 | -0.736336 |
| C  | 1.363388  | -1.649158 | -3.420624 | C  | -5.625673 | 0.572932  | -0.422133 |
| C  | 0.341768  | -2.745794 | -3.056754 | C  | -4.266401 | 0.865818  | -0.308259 |
| C  | -0.311574 | -2.574450 | -1.674741 | C  | -3.255666 | -0.115643 | -0.494040 |
| C  | -0.002111 | -2.340613 | 0.842069  | H  | -2.861044 | -2.200837 | -0.972630 |
| C  | 0.597466  | -2.859181 | -0.476353 | H  | -5.278524 | -2.747631 | -1.180644 |
| H  | 3.146013  | -2.678040 | -2.494459 | H  | -7.018512 | -1.018064 | -0.835092 |
| H  | 0.900661  | -0.654051 | -3.265228 | H  | -6.388001 | 1.340539  | -0.275743 |
| H  | 0.819850  | -3.740230 | -3.130173 | N  | -3.593041 | 2.045735  | -0.029888 |
| H  | -0.703963 | -1.539781 | -1.594916 | H  | -4.018140 | 2.950354  | 0.142582  |
| H  | -0.977171 | -2.828196 | 1.040902  | N  | -2.019154 | 0.485270  | -0.318815 |
| H  | 3.329590  | -0.836982 | -2.688445 | Cr | 0.026704  | 0.103969  | -0.280561 |
| H  | 1.547032  | -1.695609 | -4.519278 | C  | 0.120341  | -0.389381 | 1.727519  |
| H  | -0.450354 | -2.738080 | -3.825448 | C  | -0.999951 | -1.201939 | 2.359276  |
| H  | -1.208308 | -3.218900 | -1.607802 | C  | -1.263080 | -2.618640 | 1.829323  |
| H  | 0.640921  | -2.612567 | 1.697000  | C  | 0.813028  | -4.180099 | -0.393745 |
| H  | 0.830784  | -3.943749 | -0.466732 | C  | 0.032914  | -2.038456 | -1.583814 |
| H  | 1.568380  | -2.359034 | -0.648274 | C  | -0.224060 | -3.467157 | -1.274879 |
| C  | -1.186690 | 0.151268  | 3.424839  | H  | 0.179626  | 0.613604  | 2.179537  |
| H  | -2.113288 | 0.694121  | 3.212266  | H  | -0.774830 | -1.279392 | 3.443137  |
| H  | -1.293550 | -0.917206 | 3.645372  | H  | -1.581066 | -2.556304 | 0.780081  |
| C  | 0.004091  | 0.764978  | 3.435074  | H  | 1.775260  | -4.196645 | -0.936004 |
| H  | 0.928276  | 0.229080  | 3.674335  | H  | 1.058244  | -1.728012 | -1.823261 |
| H  | 0.094399  | 1.837647  | 3.233196  | H  | 1.109491  | -0.860529 | 1.825855  |

<sup>68</sup>B

Geometry with 62 atoms:

Total energy: -2363.482087820

|   |          |           |           |
|---|----------|-----------|-----------|
| C | 5.078070 | -1.689097 | -0.662661 |
| C | 3.711672 | -1.404089 | -0.619700 |
| C | 3.324791 | -0.072097 | -0.412251 |
| C | 4.317466 | 0.931387  | -0.244839 |
| C | 5.683052 | 0.649886  | -0.289824 |
| C | 6.049120 | -0.682006 | -0.503192 |

|    |           |           |           |
|----|-----------|-----------|-----------|
| H  | 5.401452  | -2.720705 | -0.820380 |
| H  | 2.973332  | -2.196633 | -0.730075 |
| H  | 6.431012  | 1.434532  | -0.160252 |
| H  | 7.108253  | -0.945935 | -0.542965 |
| N  | 3.621659  | 2.113270  | -0.041894 |
| H  | 4.029464  | 3.027168  | 0.122905  |
| N  | 2.076305  | 0.522130  | -0.317404 |
| C  | 2.290556  | 1.840521  | -0.083358 |
| C  | -1.175051 | 2.718267  | 0.138870  |
| C  | -1.229301 | 4.131071  | 0.384581  |
| C  | -0.010043 | 4.809942  | 0.480863  |
| C  | 1.220179  | 4.160395  | 0.343919  |
| C  | 1.191454  | 2.744774  | 0.105508  |
| N  | 0.013798  | 2.102907  | 0.027227  |
| H  | -0.019765 | 5.887474  | 0.666297  |
| H  | -2.183151 | 4.648885  | 0.483386  |
| H  | 2.164517  | 4.700634  | 0.410704  |
| C  | -2.257753 | 1.794187  | -0.051627 |
| C  | -3.615640 | -1.431920 | -0.815533 |
| C  | -4.975321 | -1.727995 | -0.931613 |
| C  | -5.965352 | -0.745861 | -0.736336 |
| C  | -5.625673 | 0.572932  | -0.422133 |
| C  | -4.266401 | 0.865818  | -0.308259 |
| C  | -3.255666 | -0.115643 | -0.494040 |
| H  | -2.861044 | -2.200837 | -0.972630 |
| H  | -5.278524 | -2.747631 | -1.180644 |
| H  | -7.018512 | -1.018064 | -0.835092 |
| H  | -6.388001 | 1.340539  | -0.275743 |
| N  | -3.593041 | 2.045735  | -0.029888 |
| H  | -4.018140 | 2.950354  | 0.142582  |
| N  | -2.019154 | 0.485270  | -0.318815 |
| Cr | 0.026704  | 0.103969  | -0.280561 |
| C  | 0.120341  | -0.389381 | 1.727519  |
| C  | -0.999951 | -1.201939 | 2.359276  |
| C  | -1.263080 | -2.618640 | 1.829323  |
| C  | 0.813028  | -4.180099 | -0.393745 |
| C  | 0.032914  | -2.038456 | -1.583814 |
| C  | -0.224060 | -3.467157 | -1.274879 |
| H  | 0.179626  | 0.613604  | 2.179537  |
| H  | -0.774830 | -1.279392 | 3.443137  |
| H  | -1.581066 | -2.556304 | 0.780081  |
| H  | 1.775260  | -4.196645 | -0.936004 |
| H  | 1.058244  | -1.728012 | -1.823261 |
| H  | 1.109491  | -0.860529 | 1.825855  |
| H  | -1.942093 | -0.631797 | 2.298160  |
| H  | -2.144548 | -3.004177 | 2.369347  |
| H  | 0.506242  | -5.235439 | -0.298171 |
| H  | -0.780313 | -1.460558 | -2.047916 |
| H  | -0.242655 | -3.977242 | -2.265489 |
| H  | -1.244436 | -3.600616 | -0.884650 |
| C  | 1.053002  | -3.592563 | 1.004614  |
| C  | -0.126661 | -3.645128 | 1.992513  |
| H  | 1.424306  | -2.562224 | 0.904511  |
| H  | 1.890712  | -4.157418 | 1.447570  |

H -0.560441 -4.660226 1.945747  
H 0.273595 -3.545882 3.017229

<sup>6</sup>TS[8B-12B]

Geometry with 62 atoms:

Total energy: -2363.494030890

C 5.047323 -1.868719 0.947977  
C 3.723102 -1.447671 0.911195  
C 3.470089 -0.151717 0.432399  
C 4.541744 0.676618 0.008504  
C 5.875924 0.254834 0.045578  
C 6.106863 -1.031673 0.523434  
H 5.279267 -2.871491 1.313728  
H 2.905356 -2.090632 1.232901  
H 6.692146 0.900789 -0.283220  
H 7.131916 -1.406203 0.572003  
N 3.951127 1.859308 -0.396788  
H 4.436039 2.669129 -0.769502  
N 2.282868 0.541365 0.274820  
C 2.610492 1.737124 -0.224311  
C -0.752852 2.997105 -0.389293  
C -0.674179 4.310307 -0.867586  
C 0.592398 4.821293 -1.172723  
C 1.738462 4.037454 -0.995018  
C 1.572660 2.733833 -0.508367  
N 0.351931 2.254968 -0.229811  
H 0.687983 5.842329 -1.547755  
H -1.570288 4.919548 -0.996047  
H 2.727471 4.438571 -1.224519  
C -1.956024 2.253355 -0.008096  
C -3.644304 -0.653912 1.154725  
C -5.024078 -0.799514 1.241910  
C -5.907541 0.245728 0.880283  
C -5.440188 1.471175 0.414299  
C -4.050782 1.615159 0.322830  
C -3.154217 0.577347 0.689460  
H -2.962369 -1.458432 1.425725  
H -5.440797 -1.744764 1.596822  
H -6.984494 0.083823 0.966337  
H -6.121245 2.275524 0.130427  
N -3.248158 2.656637 -0.108135  
H -3.569996 3.550715 -0.464941  
N -1.858763 1.012047 0.474173  
H -0.963197 -2.193463 -0.241671  
H -1.392163 -3.194120 1.254213  
H -0.812889 -1.237245 2.481303  
H 0.884481 -1.711362 2.246951  
C -0.508783 -2.656675 0.865874  
C -0.060440 -1.494538 1.712175  
Cr 0.171862 0.284789 0.607749  
C -1.975448 -4.217926 -1.698309  
C 0.579222 -3.623941 0.412547  
C 0.121902 -4.913306 -0.286069  
C -0.539671 -4.795419 -1.671435

H -2.397369 -4.242974 -0.679351  
H -2.624026 -4.875918 -2.300587  
H 1.287376 -3.085723 -0.246454  
H 1.171494 -3.917624 1.301108  
H 1.009429 -5.561665 -0.392697  
H -0.564853 -5.459360 0.387556  
H 0.117564 -4.211821 -2.341740  
H -0.562810 -5.809930 -2.102962  
H -0.140552 -1.800294 -1.989209  
H -1.569736 -0.742033 -1.588528  
H -1.946831 -2.824712 -3.354908  
H -3.158623 -2.462871 -2.124177  
C -1.183340 -1.768268 -1.641167  
C -2.112669 -2.788553 -2.258583

<sup>6</sup>9B

Geometry with 68 atoms:

Total energy: -2442.061587670

C 5.060944 1.206748 1.703906  
C 3.699975 0.964515 1.556342  
C 3.320428 -0.088210 0.707007  
C 4.305258 -0.862316 0.038095  
C 5.675700 -0.619791 0.187071  
C 6.032755 0.428378 1.030606  
H 5.392315 2.018688 2.355161  
H 2.948227 1.560747 2.072506  
H 6.425945 -1.221088 -0.329805  
H 7.090959 0.656507 1.177953  
N 3.598250 -1.795052 -0.699369  
H 3.996577 -2.505082 -1.305149  
N 2.068855 -0.563312 0.360003  
C 2.274999 -1.581201 -0.478220  
C -1.199740 -2.278027 -1.079286  
C -1.245426 -3.311488 -2.023120  
C -0.032418 -3.840208 -2.478067  
C 1.182698 -3.331213 -2.006443  
C 1.140939 -2.296896 -1.063880  
N -0.028722 -1.814814 -0.617004  
H -0.033924 -4.646665 -3.214447  
H -2.198105 -3.687246 -2.399860  
H 2.134145 -3.722606 -2.369872  
C -2.330380 -1.543451 -0.509199  
C -3.752037 1.022241 1.501969  
C -5.111770 1.278943 1.634324  
C -6.084135 0.506785 0.954525  
C -5.728483 -0.548203 0.119028  
C -4.358996 -0.804901 -0.014183  
C -3.373761 -0.038388 0.662514  
H -2.997599 1.614495 2.019400  
H -5.441859 2.097828 2.277473  
H -7.141537 0.746082 1.089364  
H -6.478999 -1.143668 -0.404185  
N -3.653384 -1.745523 -0.742520  
H -4.052024 -2.454199 -1.349709

|    |           |           |           |
|----|-----------|-----------|-----------|
| N  | -2.123042 | -0.525606 | 0.328978  |
| Cr | -0.024484 | -0.192782 | 0.796512  |
| C  | 0.474995  | 1.148446  | -2.669090 |
| C  | -0.363198 | 2.278045  | -3.155551 |
| C  | 0.320540  | 3.653575  | -3.116828 |
| C  | -0.692958 | 3.191839  | 0.177063  |
| C  | 0.042235  | 1.527203  | 1.989134  |
| C  | 0.370466  | 2.814906  | 1.218236  |
| H  | 0.038583  | 0.155366  | -2.531031 |
| H  | -0.673453 | 2.076104  | -4.204789 |
| H  | -0.368808 | 4.397970  | -3.552846 |
| H  | -1.640218 | 3.405098  | 0.704370  |
| H  | 0.801935  | 1.354744  | 2.779135  |
| H  | 1.563047  | 1.238362  | -2.595544 |
| H  | -1.319014 | 2.303969  | -2.597709 |
| H  | 1.196032  | 3.620840  | -3.790742 |
| H  | -0.902267 | 2.314313  | -0.459270 |
| H  | -0.914214 | 1.657846  | 2.535447  |
| H  | 1.345775  | 2.703385  | 0.707947  |
| H  | 0.502408  | 3.682748  | 1.897981  |
| C  | -0.326312 | 4.398026  | -0.702446 |
| C  | 0.786973  | 4.155797  | -1.741063 |
| H  | -0.020256 | 5.222115  | -0.033811 |
| H  | -1.228573 | 4.762410  | -1.226480 |
| H  | 1.329167  | 5.101752  | -1.909160 |
| H  | 1.537343  | 3.459162  | -1.327612 |
| C  | -0.629732 | -1.799332 | 3.332803  |
| H  | -1.459587 | -2.431489 | 2.999465  |
| H  | -0.897472 | -0.874325 | 3.853292  |
| C  | 0.645709  | -2.151139 | 3.138590  |
| H  | 1.473267  | -1.526405 | 3.489572  |
| H  | 0.914488  | -3.084946 | 2.633025  |

<sup>6</sup>10B

Geometry with 68 atoms:

Total energy: -2442.091536230

|   |           |           |           |
|---|-----------|-----------|-----------|
| C | 4.947101  | 1.999918  | -0.419942 |
| C | 3.632397  | 1.555434  | -0.503888 |
| C | 3.399395  | 0.180862  | -0.331814 |
| C | 4.483731  | -0.696929 | -0.068455 |
| C | 5.808560  | -0.252859 | 0.011885  |
| C | 6.019092  | 1.110758  | -0.170578 |
| H | 5.160145  | 3.063662  | -0.547386 |
| H | 2.809252  | 2.243268  | -0.687522 |
| H | 6.632814  | -0.939358 | 0.213963  |
| H | 7.035971  | 1.505918  | -0.114364 |
| N | 3.912869  | -1.946298 | 0.086385  |
| H | 4.406041  | -2.804427 | 0.309791  |
| N | 2.223488  | -0.551164 | -0.337457 |
| C | 2.571000  | -1.813410 | -0.068353 |
| C | -0.773108 | -3.125821 | 0.097241  |
| C | -0.656339 | -4.510258 | 0.268686  |
| C | 0.630391  | -5.055402 | 0.350310  |
| C | 1.756550  | -4.230780 | 0.247852  |

|    |           |           |           |
|----|-----------|-----------|-----------|
| C  | 1.552874  | -2.855775 | 0.078651  |
| N  | 0.314478  | -2.341582 | 0.028976  |
| H  | 0.756745  | -6.132056 | 0.481014  |
| H  | -1.541078 | -5.147589 | 0.325184  |
| H  | 2.763514  | -4.650077 | 0.288937  |
| C  | -2.001355 | -2.342516 | -0.049736 |
| C  | -3.772286 | 0.694903  | -0.598960 |
| C  | -5.155722 | 0.830656  | -0.590925 |
| C  | -6.010226 | -0.274508 | -0.364161 |
| C  | -5.508082 | -1.551815 | -0.132450 |
| C  | -4.114980 | -1.686210 | -0.139175 |
| C  | -3.246736 | -0.587441 | -0.371745 |
| H  | -3.112720 | 1.544797  | -0.768835 |
| H  | -5.597506 | 1.814515  | -0.763951 |
| H  | -7.091518 | -0.119370 | -0.369140 |
| H  | -6.166204 | -2.403981 | 0.047115  |
| N  | -3.283571 | -2.774117 | 0.058065  |
| H  | -3.579515 | -3.723465 | 0.260624  |
| N  | -1.938905 | -1.034695 | -0.314288 |
| Cr | 0.070325  | -0.293619 | -0.565844 |
| C  | -0.253037 | 1.059091  | -2.140259 |
| C  | 0.516513  | 2.368900  | -2.348696 |
| C  | 0.357551  | 3.403719  | -1.225290 |
| C  | -0.724642 | 2.136378  | 2.001823  |
| C  | 0.111475  | -0.134295 | 2.773775  |
| C  | 0.318165  | 1.337923  | 2.795689  |
| H  | -1.342464 | 1.245654  | -2.194173 |
| H  | 1.591110  | 2.147139  | -2.475698 |
| H  | 1.023883  | 4.263868  | -1.422036 |
| H  | -1.736616 | 1.827988  | 2.321649  |
| H  | 0.923435  | -0.816916 | 3.040764  |
| H  | -0.044199 | 0.384220  | -3.000043 |
| H  | 0.214462  | 2.855818  | -3.299258 |
| H  | 0.705073  | 2.967082  | -0.272599 |
| H  | -0.652107 | 1.861016  | 0.932746  |
| H  | -0.903748 | -0.543895 | 2.751251  |
| H  | 1.336846  | 1.586932  | 2.442887  |
| H  | 0.298453  | 1.690954  | 3.851969  |
| C  | -0.581906 | 3.650879  | 2.181265  |
| C  | -1.072535 | 3.933360  | -1.065328 |
| H  | 0.436356  | 3.967777  | 1.891181  |
| H  | -0.656685 | 3.859299  | 3.263253  |
| H  | -1.764655 | 3.095034  | -0.878427 |
| H  | -1.379183 | 4.354808  | -2.038930 |
| C  | -1.624845 | 4.507680  | 1.438872  |
| C  | -1.268174 | 5.000086  | 0.026763  |
| H  | -1.832083 | 5.403516  | 2.048764  |
| H  | -2.581742 | 3.954042  | 1.397934  |
| H  | -0.363055 | 5.633038  | 0.082732  |
| H  | -2.080242 | 5.677458  | -0.289258 |

<sup>6</sup>11B

Geometry with 56 atoms:

Total energy: -2284.996336860

|    |           |           |           |                 |                 |           |           |
|----|-----------|-----------|-----------|-----------------|-----------------|-----------|-----------|
| C  | 4.808176  | 2.520809  | -1.112042 | H               | -0.438750       | 4.497928  | 1.343704  |
| C  | 3.532078  | 1.964776  | -1.009811 | H               | -3.541766       | 6.231243  | 2.686187  |
| C  | 3.418348  | 0.671157  | -0.479237 |                 |                 |           |           |
| C  | 4.586282  | -0.025938 | -0.070159 |                 |                 |           |           |
| C  | 5.864725  | 0.527300  | -0.171094 | <sup>61</sup> B |                 |           |           |
| C  | 5.956289  | 1.815724  | -0.700096 | Geometry with   | 62 atoms:       |           |           |
| H  | 4.919428  | 3.527298  | -1.522009 | Total energy:   | -2363.574253320 |           |           |
| H  | 2.657229  | 2.526993  | -1.335351 | C               | -3.510357       | -4.383334 | -1.110577 |
| H  | 6.751239  | -0.023483 | 0.149383  | C               | -2.687313       | -3.258035 | -1.046290 |
| H  | 6.937514  | 2.285877  | -0.796985 | C               | -3.188520       | -2.111950 | -0.411531 |
| N  | 4.145856  | -1.252374 | 0.396784  | C               | -4.502216       | -2.124565 | 0.128092  |
| H  | 4.728213  | -1.992734 | 0.772064  | C               | -5.328353       | -3.248963 | 0.066036  |
| N  | 2.313559  | -0.142215 | -0.251291 | C               | -4.808276       | -4.381737 | -0.562015 |
| C  | 2.790252  | -1.292641 | 0.279137  | H               | -3.140180       | -5.287251 | -1.599827 |
| C  | -0.462531 | -2.846383 | 0.590970  | H               | -1.689050       | -3.278330 | -1.482370 |
| C  | -0.224345 | -4.113267 | 1.111744  | H               | -6.334677       | -3.240573 | 0.489292  |
| C  | 1.100352  | -4.498811 | 1.398998  | H               | -5.420570       | -5.283701 | -0.631460 |
| C  | 2.158516  | -3.606572 | 1.144108  | N               | -4.698609       | -0.863622 | 0.664719  |
| C  | 1.874440  | -2.347018 | 0.626558  | H               | -5.535201       | -0.538393 | 1.136467  |
| N  | 0.574418  | -1.967992 | 0.374482  | N               | -2.627941       | -0.859936 | -0.184472 |
| H  | 1.305757  | -5.489626 | 1.806169  | C               | -3.567622       | -0.133183 | 0.464556  |
| H  | -1.051595 | -4.803513 | 1.291257  | C               | -1.513904       | 2.833723  | 0.707483  |
| H  | 3.190829  | -3.899449 | 1.347090  | C               | -2.315662       | 3.799909  | 1.304546  |
| C  | -1.717447 | -2.263018 | 0.189204  | C               | -3.630949       | 3.461440  | 1.680058  |
| C  | -3.679073 | 0.344234  | -1.278612 | C               | -4.115846       | 2.162475  | 1.435543  |
| C  | -5.061591 | 0.310229  | -1.463150 | C               | -3.279833       | 1.228647  | 0.832587  |
| C  | -5.831902 | -0.799369 | -1.061054 | N               | -1.987943       | 1.561552  | 0.490937  |
| C  | -5.240794 | -1.914404 | -0.465751 | H               | -4.275945       | 4.206938  | 2.146925  |
| C  | -3.856319 | -1.875730 | -0.283934 | H               | -1.933815       | 4.809973  | 1.470640  |
| C  | -3.066412 | -0.761818 | -0.672731 | H               | -5.138840       | 1.893621  | 1.707940  |
| H  | -3.094313 | 1.203408  | -1.603748 | C               | -0.165187       | 2.968418  | 0.219749  |
| H  | -5.558469 | 1.161473  | -1.934125 | C               | 2.751087        | 1.765281  | -1.475347 |
| H  | -6.912062 | -0.789080 | -1.223384 | C               | 3.910427        | 2.505910  | -1.709500 |
| H  | -5.831597 | -2.779902 | -0.159474 | C               | 4.035886        | 3.839892  | -1.274038 |
| N  | -2.969206 | -2.793285 | 0.250429  | C               | 2.999417        | 4.477274  | -0.591521 |
| H  | -3.204172 | -3.708241 | 0.619159  | C               | 1.841376        | 3.731573  | -0.359166 |
| N  | -1.737865 | -1.026067 | -0.359019 | C               | 1.697801        | 2.383828  | -0.783930 |
| Cr | 0.205107  | -0.166784 | -0.398428 | H               | 2.678902        | 0.737113  | -1.826145 |
| C  | -0.158916 | 1.940998  | -1.581875 | H               | 4.739785        | 2.039790  | -2.246388 |
| C  | -2.677374 | 6.002147  | 2.042387  | H               | 4.959402        | 4.386470  | -1.477951 |
| C  | -0.098170 | 2.305950  | -0.274658 | H               | 3.085887        | 5.512392  | -0.255330 |
| H  | 0.742510  | 1.862975  | -2.198270 | N               | 0.650487        | 4.055562  | 0.264922  |
| H  | -1.115577 | 1.840464  | -2.104119 | H               | 0.422461        | 4.949279  | 0.685249  |
| C  | -2.563937 | 4.502600  | 1.773439  | N               | 0.438267        | 1.928280  | -0.402372 |
| H  | -2.801160 | 6.569498  | 1.104459  | Cr              | -0.837857       | 0.224868  | -0.444163 |
| H  | -1.775274 | 6.388720  | 2.546127  | C               | 7.798900        | -3.687297 | 1.383141  |
| C  | -1.274362 | 2.631330  | 0.602128  | C               | 6.639286        | -2.707449 | 1.555800  |
| H  | 0.889157  | 2.492659  | 0.169871  | H               | 7.513617        | -4.705577 | 1.698078  |
| C  | -1.375704 | 4.144032  | 0.876931  | H               | 8.675369        | -3.387933 | 1.980578  |
| H  | -3.494704 | 4.137048  | 1.303042  | C               | 0.410929        | -1.268808 | -1.844866 |
| H  | -2.473280 | 3.957345  | 2.730352  | C               | 5.398474        | -3.085287 | 0.741716  |
| H  | -2.208618 | 2.277791  | 0.140639  | H               | 6.365289        | -2.641869 | 2.624687  |
| H  | -1.173255 | 2.104805  | 1.567785  | H               | 6.966564        | -1.691931 | 1.266056  |
| H  | -1.460665 | 4.678939  | -0.085657 | C               | 0.671129        | -1.758997 | -0.602671 |
|    |           |           |           | H               | -0.406759       | -1.666333 | -2.454616 |

|   |          |           |           |
|---|----------|-----------|-----------|
| H | 1.086685 | -0.565550 | -2.341112 |
| C | 4.237597 | -2.102525 | 0.907696  |
| H | 5.670796 | -3.151796 | -0.328221 |
| H | 5.065226 | -4.099326 | 1.031155  |
| C | 1.871019 | -1.428601 | 0.241746  |
| H | 8.119775 | -3.746801 | 0.329043  |
| H | 0.013491 | -2.544190 | -0.207274 |
| C | 3.003522 | -2.462596 | 0.077264  |
| H | 4.575714 | -1.087325 | 0.628195  |
| H | 3.955441 | -2.043178 | 1.974946  |
| H | 2.263558 | -0.434029 | -0.013938 |
| H | 1.574113 | -1.392752 | 1.303777  |
| H | 3.277325 | -2.522842 | -0.991029 |
| H | 2.637509 | -3.465841 | 0.359046  |
